# Supplementary material
Source: publisher figshare collection journal article supplement (https://brill.figshare.com/ndownloader/files/20135588)
Supplement: Supplementary file 1 [file 20135588]

## Sheet: Longevity Records
Species	Family	Maximum Longevity (Years)	Origin Of Data	Mean Body Mass (Grams)	Activity Time	Microhabitat	Insularity (yes or no)	Sample size for each species (individiuals count)*	Data Quality	Longevity Source
Dracaena guianensis	Teiidae	9.3	captive	1195	Diurnal	Aquatic	N	55	acceptable	10-12:(http://thezooreviewer.blogspot.co.il/2015/02/species-fact-profile-northern-caiman.html); Carey and Judge 2000, De Magalhaes & Costa 2009, Honegger 1969, Slavens and Slavens 1999: 9 and 3 months
Hydrosaurus weberi	Agamidae	18	captive	923.407	Diurnal	Aquatic	Y	1	low	10-15:(http://www.globalspecies.org/ntaxa/1699226), Slavens and Slavens 1999, Snider and Bowler 1992: 8.75
Varanus dumerilii	Varanidae	22.6	captive	818.297	Cathemeral	Aquatic	N	55	acceptable	22.6:(Mendyk, 2015); De Magalhaes & Costa 2009; Slavens and Slavens 1999: 10 and 7 months
Tropidophorus laotus	Scincidae	6	captive	9.0632	Cathemeral	Aquatic	N	NA	Questionable	at least 6 years (Harbig 2000)
Varanus salvator	Varanidae	15.8	captive	3724.61	Diurnal	Aquatic	N	550	high	Carey and Judge 2000, De Magalhaes & Costa 2009, Honegger 1969, Slavens and Slavens 1999: 15 and 8 months, Pianka and King 2004: 10 and 8 months
Hydrosaurus amboinensis	Agamidae	24.5	captive	1012.13	Diurnal	Aquatic	Y	55	acceptable	Carey and Judge 2000, De Magalhaes & Costa 2009, Honegger 1969, Slavens and Slavens 1999: 24.4
Physignathus cocincinus	Agamidae	18	captive	142.193	Diurnal	Aquatic	N	550	high	Carey and Judge 2000, De Magalhaes & Costa 2009, Slavens and Slavens 1999: 15.4; Snider and Bowler 1992: 11 and 5 months, Langerwerf 2006: 18 (p73)
Varanus mertensi	Varanidae	20.3	captive	1038.95	Diurnal	Aquatic	N	550	high	Carey and Judge 2000, De Magalhaes & Costa 2009, Slavens and Slavens 1999: 20 and 4 months
Basiliscus plumifrons	Corytophanidae	13	captive	49.1579	Diurnal	Aquatic	N	1000	high	Carey and Judge 2000, De Magalhaes & Costa 2009: 13, Slavens and Slavens 1999, tio l Geographic: to 13
Varanus mitchelli	Varanidae	6.6	captive	282.296	Diurnal	Aquatic	N	1	low	Carey and Judge 2000, Slavens and Slavens 1999: 6 and 7 months
Lanthanotus borneensis	Lanthanotidae	7.9	captive	129.01	Nocturnal	Aquatic	Y	1	low	Carey and Judge 2000: 6.9; Slavens and Slavens 1999: 7 and 10 months; Petzold 2008: 6+
Hydrosaurus pustulatus	Agamidae	15.2	captive	418.117	Diurnal	Aquatic	Y	550	high	De Magalhaes & Costa 2009, Slavens and Slavens 1999: 15.2
Varanus indicus	Varanidae	17.4	captive	1016.56	Diurnal	Aquatic	N	550	high	De Magalhaes & Costa 2009, Slavens and Slavens 1999: 17 and 5 months
Crocodilurus amazonicus	Teiidae	7.8	captive	306.056	Diurnal	Aquatic	N	NA	Questionable	Honegger 1969
Shinisaurus crocodilurus	Shinisauridae	11.4	captive	60.318	Diurnal	Aquatic	N	2	low	Slavens and Slavens 1999
Basiliscus galeritus	Corytophanidae	4.8	captive	291.084	Diurnal	Aquatic	N	2	low	Slavens and Slavens 1999
Lissolepis luctuosa	Scincidae	18.2	captive	29.3419	Cathemeral	Aquatic	N	1	low	Slavens and Slavens 1999: 18.2, Brown 2012: 18
Intellagama lesueurii	Agamidae	28	captive	309.102	Diurnal	Aquatic	N	NA	Questionable	(http://www.wiresnr.org/easternwaterdragon.html) Greer 2005: can probably live for as long as 25 or even 28 years, Brown 2012: to 25-28 years, Wilson 2012: 26
Amblyrhynchus cristatus	Iguanidae	28	wild	2079.78	Diurnal	Aquatic	Y	55	acceptable	(Wikelski and Thom 2000) Carey and Judge 2000, De Magalhaes & Costa 2009: 6.4 (Captivity);Petzold 2008: 6.5
Varanus niloticus	Varanidae	20	captive	4156.68	Diurnal	Aquatic	N	550	high	10-15:(https://edis.ifas.ufl.edu/pdffiles/UW/UW33800.pdf) 10-20: (Bartlett and Bartlett, 1996; Buffrenil and Castanet, 2000; Steel, 1996); Carey and Judge 2000, De Magalhaes & Costa 2009: 14.6 , Slavens and Slavens 1999: 14 and 7 months, Hughes 1988, 102 months (de Buffrenil and Hemery 2002)
Basiliscus vittatus	Corytophanidae	9.1	captive	62.5567	Diurnal	Aquatic	N	550	high	4-7:(https://artssciences.lamar.edu/biology/jungle-critters/jungle-critters-2/belize-reptile.html) Carey and Judge 2000, Savage 2002, De Magalhaes & Costa 2009: 9.1, Slavens and Slavens 1999, Campbell 1999 ( 5 years 11 months)
Basiliscus basiliscus	Corytophanidae	9	captive	239.366	Diurnal	Aquatic	N	2	low	ADW: 7 Carey and Judge 2000: 3.3, Savage 2002: 7; Slavens and Slavens 1999: 5 and 4 months; ADW: 9 , Wikipedia: average 7 years
Emoia atrocostata	Scincidae	3.5	wild	10.0405	Diurnal	Aquatic	N	6	low	Alcala and Brown 1967: more than 3 but less than four
Eulamprus leuraensis	Scincidae	6	wild	6.57034	Diurnal	Aquatic	N	222	high	Dubey et al. 2013
Varanus beccarii	Varanidae	16.8	captive	408.824	Diurnal	Arboreal	Y	167	high	(Mendyk, 2015)
Phelsuma quadriocellata	Gekkonidae	5.33	captive	1.60428	Diurnal	Arboreal	Y	2	low	10:(http://www.pet-gecko.com/peacock-day-gecko.html); Werner et al. 1993: 5.33; Slavens and Slavens 1999: 4 and 11 months
Phelsuma laticauda	Gekkonidae	10	captive	2.76984	Diurnal	Arboreal	Y	550	high	10:(https://www.lllreptile.com/articles/23-gold-dust-day-gecko/); Carey and Judge 2000, De Magalhaes & Costa 2009, Hallmann and Griebeler 2015: 8.7, (Slavens and Slavens 1999):8.8
Varanus salvadorii	Varanidae	15	captive	4761.53	Diurnal	Arboreal	Y	155	high	12-20:(Mattison, Chris); 7.7:(Slavens and Slavens 1999)
Abronia graminea	Anguidae	10	captive	18.4533	Diurnal	Arboreal	N	1	low	15:(http://goodlifeherps.weebly.com/green-arboreal-alligator-lizard-abronia-graminea.html); aduldts caught in 2008 still alive at 2015 (Clause et al. 2016, who give 3 as age of first breeding)
Phelsuma standingi	Gekkonidae	15	captive	15.1106	Diurnal	Arboreal	Y	550	high	15:(http://www.reptiletalk.net/standings-day-gecko/); 9.7:(De Magalhaes & Costa 2009, Slavens and Slavens 1999)
Ctenosaura bakeri	Iguanidae	13.8	captive	392.572	Diurnal	Arboreal	Y	550	high	20:(http://www.zoocentral.dk/uploads/4/9/7/5/49755431/utila-spiny-tailed-igua -ctenosaura-bakeri.pdf); De Magalhaes & Costa 2009, Slavens and Slavens 1999: 13 and 9 months
Brachylophus fasciatus	Iguanidae	25	captive	185.005	Diurnal	Arboreal	Y	550	high	20-50:(http://www.cyclura.eu/de/files/publications/txt_bfasciatus_eng.htm); Carey and Judge 2000, De Magalhaes & Costa 2009: 5.9, Slavens and Slavens 1999; TAU museum records: 12 years and 5 months
Rieppeleon brevicaudatus	Chamaeleonidae	3	captive	2.70404	Diurnal	Arboreal	N	NA	Questionable	3:(http://www.chameleonforums.com/care/caresheets/pygmy/), LeBerre 2009: 2
Correlophus sarasinorum	Diplodactylidae	30	captive	20.1837	Nocturnal	Arboreal	Y	NA	Questionable	30:(http://www.the-gex-files.nl/indexeng.php?pagi =pages/sarasinorum_eng), 3.7:(Slavens and Slavens 1999)
Chamaeleo gracilis	Chamaeleonidae	10	captive	33.9505	Diurnal	Arboreal	N	1	low	3-5:(Ne?as 1999), 1.6:(Slavens and Slavens 1999)
Chamaeleo senegalensis	Chamaeleonidae	5	captive	38.8745	Diurnal	Arboreal	N	1	low	5:(http://exoticpets.about.com/od/chameleons/a/Senegal-Chameleon.htm), 1.5:(Slavens and Slavens 1999)
Furcifer minor	Chamaeleonidae	2	captive	10.8571	Diurnal	Arboreal	Y	NA	Questionable	6:(http://www.captivebredreptileforums.co.uk/chameleons/50536-furcifer-minor-success-last.html), LeBerre 2009: 2
Ptychozoon lionotum	Gekkonidae	10	captive	16.7903	Nocturnal	Arboreal	N	2	low	7-10:(https://sites.google.com/site/thesmoothbackedglidingg/); Werner et al. 1993: 2 and 2 months; Slavens and Slavens 1999: 4 and 5 months
Trioceros deremensis	Chamaeleonidae	5	captive	65.0974	Diurnal	Arboreal	N	NA	Questionable	8:(http://www.chameleonforums.com/threads/age-of-trioceros-deremensis-and-quadricornis-in-captivity.35407/), LeBerre et al. 2000, LeBerre 2009: over 3 years,(http://www.chameleonforums.com/blogs/entry/basic-chameleon-information-11-18.632/):3
Kinyongia fischeri	Chamaeleonidae	3.83333	captive	25.6027	Diurnal	Arboreal	N	2	low	8:(http://www.luckyreptile.com/tiere/150/en/pid1,467$pid2,47$pid3,48/animals.html), 3.1:(Slavens and Slavens 1999)
Blaesodactylus sakalava	Gekkonidae	10	captive	23.2514	Cathemeral	Arboreal	Y	NA	Questionable	8-10:(http://www.reptile-care.de/species/Gekkota/Gekkonidae/Blaesodactylus-sakalava.html); 8:(Werner et al. 1993)
Brachylophus vitiensis	Iguanidae	9.1	captive	380.521	Diurnal	Arboreal	Y	2	low	at least 14 (Reidpath), Slavens and Slavens 1999: 9 and 1 month
Trachylepis buettneri	Scincidae	1.6	captive	5.138	Diurnal	Arboreal	N	12	low	Barbault 1976: 18 months
Lyriocephalus scutatus	Agamidae	3.5	captive	71.2977	Diurnal	Arboreal	Y	1	low	Carey and Judge 2000
Oplurus cyclurus	Opluridae	9.3	captive	28.9905	Diurnal	Arboreal	Y	55	acceptable	Carey and Judge 2000, De Magalhaes & Costa 2009, Slavens and Slavens 1999
Corucia zebrata	Scincidae	24.3	captive	481.061	Nocturnal	Arboreal	Y	550	high	Carey and Judge 2000, De Magalhaes & Costa 2009, Slavens and Slavens 1999
Anolis equestris	Dactyloidae	16.6	captive	98.6671	Diurnal	Arboreal	Y	550	high	Carey and Judge 2000, De Magalhaes & Costa 2009, Slavens and Slavens 1999, Henderson & Powell 2009: 16 and 6 months; 149 months (Andrew Durso in "Anole An ls" (http://www.anolean ls.org/2013/06/27/fill-in-the-blank-obscure-anole-life-history-traits/)
Phelsuma lineata	Gekkonidae	10	captive	2.83681	Diurnal	Arboreal	Y	55	acceptable	Carey and Judge 2000, De Magalhaes & Costa 2009, Werner et al. 1993(5 years, 8 months); Slavens and Slavens 1999: 3, 10: (Hallmann and Griebeler 2015)
Gehyra oceanica	Gekkonidae	15.5	captive	9.00281	Nocturnal	Arboreal	Y	55	acceptable	Carey and Judge 2000, De Magalhaes & Costa 2009, Werner et al. 1993: 10.5; Slavens and Slavens 1999: 10.5, Brown 2012: 15.5
Ptychozoon kuhli	Gekkonidae	6.4	captive	14.4897	Nocturnal	Arboreal	N	3	low	Carey and Judge 2000: 1.1; Werner et al. 1993: 1 year, 10 months - as Rogner 1997, p96 writes it takes them 12-24 months to mature this is highly doubtful; TAU museum records: 6 years & 4 months
Anolis luteogularis	Dactyloidae	2.11	captive	76.4672	Diurnal	Arboreal	Y	1	low	Carey and Judge 2000: 2.8, Snider and Bowler 1992: 2 and 11 months
Phelsuma astriata	Gekkonidae	7.5	captive	2.83547	Diurnal	Arboreal	Y	55	acceptable	De Magalhaes & Costa 2009 and Slavens and Slavens 1999: 7.5; Werner et al. 1993: 5.1
Phelsuma cepediana	Gekkonidae	9.3	captive	2.62636	Diurnal	Arboreal	Y	55	acceptable	De Magalhaes & Costa 2009 and Slavens and Slavens 1999: 9.3; Werner et al. 1993: 8.67
Corytophanes cristatus	Corytophanidae	7.1	captive	32.0779	Diurnal	Arboreal	N	55	acceptable	De Magalhaes & Costa 2009, Slavens and Slavens 1999
Ctenosaura palearis	Iguanidae	10.3	captive	445.583	Diurnal	Arboreal	N	10	low	De Magalhaes & Costa 2009, Slavens and Slavens 1999: 10 and 3 months`
Naultinus rudis	Diplodactylidae	13	captive	5.17917	Diurnal	Arboreal	Y	10	low	De Magalhaes & Costa 2009, Slavens and Slavens 1999: 13
Varanus prasinus	Varanidae	15.5	captive	303.356	Diurnal	Arboreal	N	550	high	De Magalhaes & Costa 2009: 14.2; Slavens and Slavens 1999: 15 and 5 months
Phelsuma sundbergi	Gekkonidae	15.9	captive	8.84848	Diurnal	Arboreal	Y	55	acceptable	De Magalhaes & Costa 2009: 15.9; Werner et al. 1993: 3; Slavens and Slavens 1999: 10.8
Phelsuma guentheri	Gekkonidae	17.9	captive	33.794	Cathemeral	Arboreal	Y	10	low	De Magalhaes & Costa 2009: 17.8, Slavens and Slavens 1999: 17.9, Werner et al. 1993: 13 years, 7 months;
Naultinus elegans	Diplodactylidae	23	captive	6.08887	Diurnal	Arboreal	Y	55	acceptable	De Magalhaes & Costa 2009: 20; Werner et al. 1993: 20; Bauer 2013 and Cree and Hare 2016: 20; Slavens and Slavens 1999: 20, A stasiadis and Whitaker 1987: 23( Robb 1986)
Rhacodactylus leachianus	Diplodactylidae	30	captive	169.984	Nocturnal	Arboreal	Y	550	high	De Magalhaes & Costa 2009: 8.5, Honegger 1969, Werner et al. 1993: 30; Slavens and Slavens 1999: 8.5
Mokopirirakau granulatus	Diplodactylidae	30	captive	9.74632	Cathemeral	Arboreal	Y	550	high	De Magalhaes & Costa 2009; Slavens and Slavens 1999: 21; Werner et al. 1993: 8.5, A stasiadis and Whitaker 1987: 8-9
Phelsuma inexpectata	Gekkonidae	7	captive	3.65974	Diurnal	Arboreal	Y	NA	Questionable	Dubos 2013
Phelsuma grandis	Gekkonidae	20	captive	20.7746	Diurnal	Arboreal	Y	NA	Questionable	Dubos 2013,(http://www.reptilesmagazine.com/Care-Sheets/Lizards/Giant-Day-Gecko/):20
Epibator nigrofasciolatum	Scincidae	10	captive	13.6284	Diurnal	Arboreal	Y	NA	Questionable	Hauschild and Gassner 1995: 10
Anolis allisoni	Dactyloidae	1.8	captive	7.17786	Diurnal	Arboreal	N	1	low	Henderson & Powell 2009: 1 and 8 months (in captivity)
Lygodactylus picturatus	Gekkonidae	1.1	captive	0.986263	Diurnal	Arboreal	N	6	low	Hughes 1988: 1.1 , Slavens and Slavens 1999: 1 year
Oedura castelnaui	Diplodactylidae	15	captive	14.8434	Nocturnal	Arboreal	N	1	low	in excess of 15 years (Porter 2008)
Oedura filicipoda	Diplodactylidae	15	captive	21.682	Nocturnal	Arboreal	N	NA	Questionable	in excess of 15 years (Porter 2008)
Furcifer polleni	Chamaeleonidae	5	captive	8.42892	Diurnal	Arboreal	Y	NA	Questionable	Necas 1999
Brookesia ebenaui	Chamaeleonidae	5	captive	3.03499	Diurnal	Arboreal	Y	NA	Questionable	Necas 1999: >5
Sphaerodactylus roosevelti	Sphaerodactylidae	2.3	captive	1.12041	Nocturnal	Arboreal	Y	NA	Questionable	Regalado 2006:4
Anolis porcatus	Dactyloidae	5.25	captive	5.95122	Diurnal	Arboreal	Y	1	low	Rogner 1997: male still fertile at 5 and 3 months and still alive and healthy
Trachylepis sparsa	Scincidae	3.8	captive	9.34799	Diurnal	Arboreal	N	1	low	Slavens and Slavens 1999
Nadzikambia mlanjensis	Chamaeleonidae	2.1	captive	13.1141	Diurnal	Arboreal	N	1	low	Slavens and Slavens 1999
Anolis biporcatus	Dactyloidae	3.1	captive	18.6103	Diurnal	Arboreal	N	1	low	Slavens and Slavens 1999
Anolis petersii	Dactyloidae	1.3	captive	27.1554	Diurnal	Arboreal	N	1	low	Slavens and Slavens 1999
Trachylepis binotata	Scincidae	8.1	captive	31.5198	Diurnal	Arboreal	N	1	low	Slavens and Slavens 1999
Ctenosaura clarki	Iguanidae	5.7	captive	126.805	Diurnal	Arboreal	N	1	low	Slavens and Slavens 1999
Lygodactylus keniensis	Gekkonidae	4.7	captive	0.883667	Diurnal	Arboreal	N	1	low	Slavens and Slavens 1999
Phelsuma dubia	Gekkonidae	4.7	captive	3.29023	Diurnal	Arboreal	N	1	low	Slavens and Slavens 1999
Phelsuma serraticauda	Gekkonidae	5.2	captive	4.03501	Diurnal	Arboreal	Y	1	low	Slavens and Slavens 1999
Naultinus punctatus	Diplodactylidae	7	captive	12.5984	Diurnal	Arboreal	Y	1	low	Slavens and Slavens 1999
Sphaerodactylus cinereus	Sphaerodactylidae	3.4	captive	0.597027	Nocturnal	Arboreal	Y	1	low	Slavens and Slavens 1999
Cyrtodactylus marmoratus	Gekkonidae	3.1	captive	8.95977	Nocturnal	Arboreal	N	1	low	Slavens and Slavens 1999
Ptychozoon horsfieldii	Gekkonidae	7.7	captive	9.24636	Nocturnal	Arboreal	N	1	low	Slavens and Slavens 1999
Hemidactylus tanganicus	Gekkonidae	3.3	captive	9.57775	Nocturnal	Arboreal	N	1	low	Slavens and Slavens 1999
Anolis chlorocyanus	Dactyloidae	2.1	captive	5.53226	Diurnal	Arboreal	Y	1	low	Slavens and Slavens 1999, Henderson & Powell 2009: 2 and 1 months (in captivity)
Anolis leachii	Dactyloidae	7	captive	34.8093	Diurnal	Arboreal	Y	1	low	Slavens and Slavens 1999, Henderson & Powell 2009: 7 years as bimaculatus leachi
Aristelliger lar	Sphaerodactylidae	1.9	captive	38.5513	Nocturnal	Arboreal	Y	1	low	Slavens and Slavens 1999, Henderson and Powell 2009: 1 and 11 months in captivity
Anolis smallwoodi	Dactyloidae	3.9	captive	89.9077	Diurnal	Arboreal	Y	1	low	Slavens and Slavens 1999, Henderson and Powell 2009: 3 and 11 months (in captivity)
Anolis semilineatus	Dactyloidae	3.2	captive	1.30055	Diurnal	Arboreal	Y	1	low	Slavens and Slavens 1999, Henderson and Powell 2009: 3 years, 2 months (in captivity)
Abronia mixteca	Anguidae	4.7	captive	22.4397	Diurnal	Arboreal	N	1	low	Slavens and Slavens 1999, Snider and Bowler 1992: 4 and 7 months
Trioceros montium	Chamaeleonidae	10	captive	17.7053	Diurnal	Arboreal	N	3	low	Slavens and Slavens 1999: 3 and 2 months; Necas 1999: 9, "often beyond 9" - Measey et al. 2014, so I write 10, LeBerre et al. 2000, LeBerre 2009: 2 years
Lophosaurus boydii	Agamidae	10	captive	102.734	Diurnal	Arboreal	N	1	low	to 10, exceptio lly even longer (Brown 2012)
Hemidactylus bouvieri	Gekkonidae	4.4	captive	1.74606	Nocturnal	Arboreal	Y	7	low	Werner et al. 1993
Hemidactylus garnotii	Gekkonidae	1.3	captive	3.02977	Nocturnal	Arboreal	N	NA	Questionable	Werner et al. 1993
Geckolepis typica	Gekkonidae	10	captive	3.20184	Nocturnal	Arboreal	Y	10	low	Werner et al. 1993
Bavayia cyclura	Diplodactylidae	8	captive	3.69811	Nocturnal	Arboreal	Y	NA	Questionable	Werner et al. 1993
Uroplatus alluaudi	Gekkonidae	4	captive	8.47856	Nocturnal	Arboreal	Y	NA	Questionable	Werner et al. 1993
Naultinus stellatus	Diplodactylidae	47	captive	5.78694	Diurnal	Arboreal	Y	1	low	Werner et al. 1993: 10, A stasiadis and Whitaker 1987: 10, (Hare et al. 2007):47
Oedura monilis	Diplodactylidae	14	captive	13.8972	Nocturnal	Arboreal	N	NA	Questionable	Werner et al. 1993: 14
Phyllodactylus pulcher	Phyllodactylidae	3.1	captive	3.37113	Nocturnal	Arboreal	Y	NA	Questionable	Werner et al. 1993: 3 years, 1 month
Chamaeleo calyptratus	Chamaeleonidae	10	captive	131.702	Diurnal	Arboreal	N	NA	Questionable	When housed and fed properly, a male chameleon generally lives 7-10 yrs; breeding females, 4-6 years:(http://www.peteducation.com/article.cfm?c=17+1796&aid=2363); LeBerre 2009: 5
Furcifer pardalis	Chamaeleonidae	6	captive	32.8364	Diurnal	Arboreal	Y	550	high	3:("Furcifer pardalis", 2002; Ferguson, et al., 2004), Mattioli et al. 2006:2, Rogner 1997: 2, Andreone et al. 2005: 2, Measey et al. 2014: 2 LeBerre et al. 2000: 6, LeBerre 2009: over 6 in captivity, De Magalhaes & Costa 2009: 5.2, Slavens and Slavens 1999: 5 years, 2 months
Phelsuma madagascariensis	Gekkonidae	13.6	captive	15.03	Diurnal	Arboreal	Y	1000	high	("Smithsonian tio l Zoological Park Reptiles & Amphibians Fact Sheet", 2009; Bartlett and Bartlett, 2001) 15: ("Smithsonian tio l Zoological Park Reptiles & Amphibians Fact Sheet", 2009; Bartlett and Bartlett, 2001); Carey and Judge 2000, De Magalhaes & Costa 2009, Slavens and Slavens 1999: 10, Loveridge 1942: >3 years, Hallmann and Griebeler 2015: 13.6
Chamaeleo chamaeleon	Chamaeleonidae	6	captive	31.5577	Diurnal	Arboreal	N	55	acceptable	(Cuadrado, 2001) Slavens and Slavens 1999, Hughes 1988: 3 years 7 months in Jerusalem, Necas 1999: 6 but maybe even longer, LeBerre 2009: 5 years
Iguana iguana	Iguanidae	28	captive	1878.47	Diurnal	Arboreal	N	1000	high	(De Vosjoli, 1992; Frye, 1995) Carey and Judge 2000, De Magalhaes & Costa 2009: 19.8, Castanet 1994, Honegger 1969, Slavens and Slavens 1999, Rogers 1997: 28, Petzold 2008: 12 & 5 months
Hemidactylus frenatus	Gekkonidae	7	captive	2.85426	Nocturnal	Arboreal	N	7	low	(DeVoe, 2015) Werner et al. 1993
Furcifer labordi	Chamaeleonidae	1.4	captive	13.9887	Nocturnal	Arboreal	Y	40	acceptable	(Eckhardt et al. 2017)
Trioceros melleri	Chamaeleonidae	12	wild	399.722	Diurnal	Arboreal	N	NA	Questionable	(http://animals. tio lgeographic.com/animals/reptiles/mellers-chameleon/) Necas 1999: 12 years, Measey et al. 2014: 12, LeBerre 2009: over 10
Naultinus grayii	Diplodactylidae	25	wild	10.0398	Diurnal	Arboreal	Y	55	acceptable	(http://www.bcssecretreptiles.com/care-sheets/ ultinus-grayii-new-zealand-gecko/):30 De Magalhaes & Costa 2009: 16; Werner et al. 1993: 23, Slavens and Slavens 1999: 16,
Uroplatus fimbriatus	Gekkonidae	10	captive	94.718	Nocturnal	Arboreal	Y	2	low	(https://aquazoo1.wordpress.com/) 10-15:(https://aquazoo1.wordpress.com/), Carey and Judge 2000: 1.3; Werner et al. 1993: 5; Slavens and Slavens 1999: 7.33
Trioceros jacksonii	Chamaeleonidae	9	wild	26.8301	Diurnal	Arboreal	N	4	low	(https://www.aboutanimals.com/reptile/jacksons-chameleon/) Slavens and Slavens 1999: 8 years, 2 months, Necas 1999: 9 or more, Rogner 1997: 9, LeBerre 2009: over 8
Brachylophus bulabula	Iguanidae	25	captive	295.64	Diurnal	Arboreal	Y	NA	Questionable	(IUCN)
Furcifer oustaleti	Chamaeleonidae	5	captive	397.656	Diurnal	Arboreal	Y	NA	Questionable	(LeBerre 2009)
Trioceros affinis	Chamaeleonidae	5	captive	6.54574	Diurnal	Arboreal	N	NA	Questionable	(Necas 1999) Necas 1999: over 5 in captivity, much less in the wild
Anolis stratulus	Dactyloidae	1.6	wild	1.71942	Diurnal	Arboreal	Y	9	low	(Reagan 1992)
Gekko vittatus	Gekkonidae	5	captive	33.4261	Nocturnal	Arboreal	Y	NA	Questionable	(Slavens and Slavens 1999)
Uroplatus sikorae	Gekkonidae	7	captive	22.615	Nocturnal	Arboreal	Y	NA	Questionable	(Svatek and Van Duin, 2001) Bauer 2013: 7
Phelsuma guimbeaui	Gekkonidae	8	captive	4.05543	Diurnal	Arboreal	Y	55	acceptable	(Toren et al. 2015) De Magalhaes & Costa 2009 and Slavens and Slavens 1999: 7.1; Werner et al. 1993: 8
Mniarogekko chahoua	Diplodactylidae	5	captive	48.7107	Nocturnal	Arboreal	Y	NA	Questionable	(Werner 1993)
Bradypodion thamnobates	Chamaeleonidae	2.4	captive	7.12526	Diurnal	Arboreal	N	1	low	10 months:(https://www.pixgram.me/chameleon_breeder/media/1281380737001851845_2137856329) Slavens and Slavens 1999
Varanus melinus	Varanidae	10.7	captive	2780.66	Diurnal	Arboreal	Y	1	low	10.7: (Mendyk, 2015); 10+(http://cincin tizoo.org/blog/animals/quince-monitor/), Ziegler et al. 2010: 8.5
Calumma parsonii	Chamaeleonidae	14	captive	139.035	Diurnal	Arboreal	Y	55	acceptable	10-12:(http://online-field-guide.com/Calummaparsonii.htm); minimum age: 9 for males, 8 for males:(Tessa et al. 2017) De Magalhaes & Costa 2009;(http://online-field-guide.com/Calummaparsonii.htm):10-12, http://www.skypoint.com/members/mikefry/parsonii2.html: 20 years, LeBerre 2009: over 10
Hesperoedura reticulata	Diplodactylidae	11	wild	4.89167	Nocturnal	Arboreal	N	651	high	11: (Kitchener et al. 1988), 11 years: (Werner et al. 1993), >9: (Wilson 2012), Wilson 2012: 9.5
Anolis carolinensis	Dactyloidae	11	captive	3.70473	Diurnal	Arboreal	N	550	high	1-10:(Dirickson, 1976; Losos, 2009) Carey and Judge 2000, De Magalhaes & Costa 2009: 7.2, Slavens and Slavens 1999; Petzold 2008: 11
Toropuku stephensi	Diplodactylidae	16	wild	8.43718	Nocturnal	Arboreal	Y	NA	Questionable	16 (Bauer 2013, Kurita and Toda 2013, Kalayci et al. 2015, Cree and Hare 2016)
Trioceros ellioti	Chamaeleonidae	6	captive	17.653	Diurnal	Arboreal	N	1	low	2-3:(Necas 1999) Slavens and Slavens 1999: 4 Necas 1999: 4, Rogner 1997: over 4, Uetz 1989: 4 (captivity)
Acanthosaura armata	Agamidae	2.08333	wild	41.3991	Diurnal	Arboreal	N	1	low	2-5:(http://ourwhite.goip.de/tf) Slavens and Slavens 1999
Anolis gundlachi	Dactyloidae	3	wild	4.01137	Diurnal	Arboreal	Y	82	acceptable	3 years (Henderson & Powell 2009), at least 3 (Schwartz and Henderson 1991)
Acanthocercus atricollis	Agamidae	10.9167	captive	42.3326	Diurnal	Arboreal	N	55	acceptable	3-5:(http://www. ture-photo.com/blue-headed-tree-agama-fact-sheet-73.html) TAU museum records: 10 years and 11 months
Naultinus manukanus	Diplodactylidae	30	captive	6.93772	Diurnal	Arboreal	Y	1	low	4+:(Hare et al. 2007) Slavens and Slavens 1999: 5; at least 30 (Hare et al. 2007)
Uroplatus phantasticus	Gekkonidae	10	captive	4.85911	Diurnal	Arboreal	Y	NA	Questionable	4-8:(http://www.animalspot.net/satanic-leaf-tailed-gecko.html)
Lamprolepis smaragdina	Scincidae	5	wild	14.5406	Diurnal	Arboreal	Y	NA	Questionable	Alcala 1966
Draco volans	Agamidae	3	wild	9.75882	Diurnal	Arboreal	N	40	acceptable	Alcala 1966 (http://www.reptileforums.co.uk/forums/lizards/109312-draco-volans-flying-dragon.html)
Phymaturus aguanegra	Liolaemidae	16	wild	33.3426	Diurnal	Arboreal	N	36	acceptable	Cabezas-Cartes et al. 2018
Sphaerodactylus savagei	Sphaerodactylidae	4	captive	0.895337	Cathemeral	Arboreal	Y	NA	Questionable	Carey and Judge 2000, Slavens and Slavens 1999
Woodworthia brunnea	Diplodactylidae	53	wild	6.18277	Nocturnal	Arboreal	Y	23	low	Cree and Hare 2016
Naultinus gemmeus	Diplodactylidae	16	captive	6.44933	Diurnal	Arboreal	Y	55	acceptable	Cree and Hare 2016:13 De Magalhaes & Costa 2009, Slavens and Slavens 1999: 16; Cree and Hare 2016: 16, 13 in ture
Urosaurus graciosus	Phrynosomatidae	5	wild	5.47104	Diurnal	Arboreal	N	64	acceptable	Gates 1963: probably 5
Liolaemus pictus	Liolaemidae	9	wild	5.69655	Diurnal	Arboreal	N	31	acceptable	Gutierrez et al. 2013:9; Cabezas-Cartes et al. 2015: 9
Anolis garmani	Dactyloidae	10	wild	23.5213	Diurnal	Arboreal	Y	NA	Questionable	Henderson & Powell 2009: to 10
Oedura coggeri	Diplodactylidae	15	captive	8.60016	Nocturnal	Arboreal	N	1	low	in excess of 15 years (Porter 2008)
Gerrhonotus rhombifer	Anguidae	4	captive	29.4547	Nocturnal	Arboreal	N	1	low	Lamar et al. 2015
Trioceros cristatus	Chamaeleonidae	2.5	captive	35.0815	Diurnal	Arboreal	N	NA	Questionable	LeBerre 2009: over 2 years
Woodworthia maculata	Diplodactylidae	37	wild	5.6448	Nocturnal	Arboreal	Y	133	high	Lettink & Whitaker 2006
Anolis oculatus	Dactyloidae	1.2	wild	4.13758	Diurnal	Arboreal	Y	44	acceptable	male:0.51, female:1.24 years (Henderson & Powell 2009)
Trioceros hoehnelii	Chamaeleonidae	4.5	captive	14.6885	Diurnal	Arboreal	N	NA	Questionable	Measey et al. 2014: 4.5; Lin and Nelson 1980: 4.5 (Necas 1999: 4), (http://www.chameleonforums.com/blogs/entry/basic-chameleon-information-11-18.632/):8
Sphaerodactylus argus	Sphaerodactylidae	4	captive	0.895337	Diurnal	Arboreal	Y	25	low	NA
Sceloporus olivaceus	Phrynosomatidae	3.8	wild	20.25	Diurnal	Arboreal	N	NA	Questionable	Pianka and Parker 1975 2:(http://www.repticzone.com/forums/Swifts/messages/1748298.html)
Woodworthia chrysosiretica	Diplodactylidae	9	captive	6.18277	Cathemeral	Arboreal	Y	1	low	Slavens and Slavens 1999
Trioceros quadricornis	Chamaeleonidae	5	captive	35.5387	Diurnal	Arboreal	N	1	low	The female four-horned chameleon lives for about three to four years with a variation of one year for those in the wild, the males on the other hand have a span of between five to seven years:(http://chameleontime.com/four-horned-chameleon/). The female four-horned chameleon lives for about three to four years with a variation of one year for those in the wild, the males on the other hand have a …
Phelsuma rosagularis	Gekkonidae	7.1	captive	6.88	Diurnal	Arboreal	Y	NA	Questionable	Werner et al. 1993
Strophurus williamsi	Diplodactylidae	10	captive	4.13778	Nocturnal	Arboreal	N	NA	Questionable	Werner et al. 1993 over 3 years (http://www.geckosunlimited.com/community/aussie-geckos-diplodactylus-strophurus-saltuaris-phyllurus-oedura-/19641-strophurus-life-expectancy.html):10
Chalcides sepsoides	Scincidae	9.7	captive	14.7879	Cathemeral	Fossorial	N	6	low	Amitai and Bouskila 2001: 9; Slavens and Slavens 1999: 9.5, also Hughes 1988, TAUM museum records: 9.73
Concinnia queenslandiae	Scincidae	10	captive	5.8841	Cathemeral	Fossorial	N	11	low	Brown 2012
Eremiascincus pardalis	Scincidae	4	captive	5.2476	Nocturnal	Fossorial	N	NA	Questionable	Brown 2012
Eremiascincus richardsonii	Scincidae	10	captive	10.0042	Nocturnal	Fossorial	N	NA	Questionable	Brown 2012
Amphisbaena alba	Amphisbaenidae	15.2	captive	191.899	Cathemeral	Fossorial	N	55	acceptable	Carey and Judge 2000, De Magalhaes & Costa 2009: 15.1; : 14 and 11 months, Snider and Bowler 1992: 15 and 2 months
Hemiergis decresiensis	Scincidae	2.4	captive	4.02687	Diurnal	Fossorial	N	1	low	Carey and Judge 2000: 2.4
Acontias meleagris	Scincidae	3.4	captive	81.031	Cathemeral	Fossorial	N	1	low	Carey and Judge 2000: 3.4
Aprasia striolata	Pygopodidae	2	captive	5.47161	Cathemeral	Fossorial	N	NA	Questionable	Greer 1989: 2
Anomalopus swansoni	Scincidae	8	captive	18.0545	Diurnal	Fossorial	N	NA	Questionable	Greer 2005: 8, Brown 2012: >8
Trogonophis wiegmanni	Trogonophidae	14	captive	3.40942	Cathemeral	Fossorial	N	2	low	Honegger 1969 say 3 years - short compared with age at maturity, so is Snider and Bowler 1992 reporting 2… Slavens and Slavens 1999 report of 14 years,
Chalcides ocellatus	Scincidae	14	captive	21.5654	Cathemeral	Fossorial	N	1000	high	Schleich et al. 1996, Carey and Judge 2000, Amitai and Bouskila 2001: 13; Slavens and Slavens 1999: 14, TAUM museum records: : 8.18, Hauschild and Gassner 1995: 10, 8.5: (Foufopoulos and Ives 1999)
Eublepharis turcmenicus	Eublepharidae	15	captive	11.9378	Nocturnal	Fossorial	N	13	low	Seufer et al. 2005 12-15 ,(Slavens and Slavens 1999):28.6
Anniella pulchra	Anguidae	11.9	captive	55.6937	Cathemeral	Fossorial	N	1	low	Slavens and Slavens 1999
Scelotes limpopoensis	Scincidae	2.3	captive	6.51574	Diurnal	Fossorial	N	1	low	Slavens and Slavens 1999
Tetradactylus africanus	Gerrhosauridae	1.3	captive	7.46865	Diurnal	Fossorial	N	1	low	Slavens and Slavens 1999
Monopeltis capensis	Amphisbaenidae	1.8	captive	18.6753	Diurnal	Fossorial	N	1	low	Slavens and Slavens 1999
Scincopus fasciatus	Scincidae	5.3	captive	49.1264	Nocturnal	Fossorial	N	1	low	Slavens and Slavens 1999
Bellatorias frerei	Scincidae	10.8	captive	102.381	Diurnal	Fossorial	N	2	low	Slavens and Slavens 1999: 7.25; Greer 1989: 10 and 10 months
Ophiomorus tridactylus	Scincidae	5.8	captive	10.2327	Cathemeral	Fossorial	N	1	low	Snider and Bowler 1992, Carey and Judge 2000
Gerrhosaurus skoogi	Gerrhosauridae	12	captive	66.9187	Diurnal	Fossorial	N	3	low	TAU museum records: 12 years
Ophiomorus latastii	Scincidae	3.6	captive	15.4659	Cathemeral	Fossorial	N	2	low	TAU museum records: 3 years and 6 months
Blanus strauchi	Blanidae	23	captive	4.07566	Cathemeral	Fossorial	N	3	low	TAU museum records: 6 years and 4 months
Lerista bipes	Scincidae	8.3	captive	1.05034	Nocturnal	Fossorial	N	2	low	TAU museum records: 8 years and 3 months
Plestiodon obsoletus	Scincidae	7.33	wild	23.0345	Diurnal	Fossorial	N	3	low	(Hall and Fitch, 1971) Carey and Judge 2000: 6.2; Slavens and Slavens 1999: 7 and 4 months
Ophisaurus ventralis	Anguidae	14.8	captive	65.3088	Cathemeral	Fossorial	N	55	acceptable	(http://reptilesalive.com/blog/?p=564) 15:(http://www.ncparc.org/WG-EO/NCWRC%20species%20profiles/Reptiles/lizardeastglass.pdf); Carey and Judge 2000, De Magalhaes & Costa 2009: 14.8, Slavens and Slavens 1999
Plestiodon septentrionalis	Scincidae	7	wild	7.34504	Diurnal	Fossorial	N	NA	Questionable	(http://www. turenorth.com/Skink/COSEWIC_Status_Report_Prairie_Skink.pdf)
Scincus scincus	Scincidae	16.11	captive	17.2584	Cathemeral	Fossorial	N	4	low	(http://www.beastlyscience.co.uk/meet_swimmer.html) 10 years: (Schleich et al. 1996, Amitai and Bouskila 2001, Hauschild and Gassner 1995, Werner 2016); Slavens and Slavens 1999: 5.25
Blanus cinereus	Anguidae	16	wild	4.29587	Diurnal	Fossorial	N	55	acceptable	(http://www.mitoage.info/view/17767/species/) Carey and Judge 2000, De Magalhaes & Costa 2009, Slavens and Slavens 1999: 16
Bellatorias major	Scincidae	23	wild	374.924	Diurnal	Fossorial	N	NA	Questionable	(https://www.moretonbay.qld.gov.au/uploadedFiles/common/forms/environment/priority-species-of-mbrc.pdf) Carey and Judge 2000, Chapple 2003: 11-23,Greer 2005: 23, Hauschild and Gassner 1995: 23
Tribolonotus ponceleti	Scincidae	11	captive	30.3606	Nocturnal	Fossorial	Y	NA	Questionable	(McCoy 2015)
Nothobachia ablephara	Gymnophthalmidae	2	captive	2.18317	Cathemeral	Fossorial	N	NA	Questionable	(Ramiro et al. 2017)
Diplometopon zarudnyi	Trogonophidae	21	captive	4.81178	Nocturnal	Fossorial	N	NA	Questionable	(Seufer 2017)
Lissolepis coventryi	Scincidae	9	wild	13.9081	Cathemeral	Fossorial	N	NA	Questionable	>8 (Chapple 2003)
Sitana schleichi	Agamidae	1	wild	1.13726	Diurnal	Fossorial	N	NA	Questionable	1 year, none survive for 2nd (Kastle et al. 2013)
Plestiodon reynoldsi	Scincidae	10	wild	2.66944	Diurnal	Fossorial	N	539	high	Ashton 2005: 8-10, Meneken et al. 2005: 10
Chalcides chalcides	Scincidae	4	wild	36.1095	Diurnal	Fossorial	N	40	acceptable	Guarino 2010: 4
Egernia kingii	Scincidae	13	wild	158.581	Diurnal	Fossorial	N	52	acceptable	Hauschild and Gassner 1995: 12, but Greer (2005) also reports that "Over a ten year period, one free-ranging female in a suburban backyard gave birth in e times and as infrequently as every third season at other times (Masters and Shine, 2004)." - so 10 years as adult, or 13 in total, as it takes 3 to mature Greer 2005: "In captivity, individuals can live as long as 12 years (Hauschild and Gassne…
Liopholis inornata	Scincidae	10	wild	6.07686	Cathemeral	Fossorial	N	NA	Questionable	Mallee Catchment Ma gement Authority (Malee lizards fieldguide): 8-10 years
Liopholis multiscutata	Scincidae	10	wild	5.73287	Diurnal	Fossorial	N	NA	Questionable	Mallee Catchment Ma gement Authority (Malee lizards fieldguide): 8-10 years
Sitana ponticeriana	Agamidae	6	wild	2.34436	Diurnal	Fossorial	N	160	high	Pal et al. 2009
Phymaturus spurcus	Liolaemidae	12	wild	17.818	Diurnal	Saxicolous	N	NA	Questionable	Cabezas-Cartes et al. 2015
Phymaturus zapalensis	Liolaemidae	15	wild	21.967	Diurnal	Saxicolous	N	41	acceptable	Cabezas-Cartes et al. 2018
Chondrodactylus fitzsimonsi	Gekkonidae	5	captive	11.571	Cathemeral	Saxicolous	N	NA	Questionable	NA
Phymaturus patagonicus	Liolaemidae	16	wild	27.0218	Diurnal	Saxicolous	N	19	low	Piantoni et al. 2006
Agama planiceps	Agamidae	5.91667	captive	20.4926	Diurnal	Terrestrial	N	5	low	TAU museum records: 5 years and 11 months
Phrynosoma cornutum	Phrynosomatidae	10	captive	18.1862	Diurnal	Terrestrial	N	2	low	"almost 10 years" Degenhardt et al. 1996; Slavens and Slavens 1999: 1 and 7 months (i.e., before maturity..)
Mokopirirakau kahutarae	Diplodactylidae	25	captive	13.7032	Nocturnal	Terrestrial	Y	NA	Questionable	(http://nzlizards.landcareresearch.co.nz/Synopses/SpeciesSynopses.aspx?source=SearchBasic&id=856f1950-4c05-4a1d-aec6-5d2c977d071f )- 25 years
Ctenophorus decresii	Agamidae	10	captive	8.80311	Diurnal	Terrestrial	N	4	low	10:(Michael McFadden and Peter S. Harlow), 9:(Wilson 2012)
Ctenosaura melanosterna	Iguanidae	15	captive	408.023	Diurnal	Terrestrial	N	NA	Questionable	15 years (http://www.herpcenter.com/reptile-caresheets/spiny-tailed-igua .html), (https://www.hindawi.com/jour ls/isrn/2013/495304/):20
Varanus acanthurus	Varanidae	20	captive	65.8126	Diurnal	Terrestrial	N	1	low	15-20:(https://www.lllreptile.com/articles/179-ackies-monitor/); (Carey and Judge 2000, Slavens and Slavens 1999: 10)
Sceloporus cyanostictus	Phrynosomatidae	2	captive	12.7083	Diurnal	Terrestrial	N	33	acceptable	2 (Axtell and Axtell 1971)
Uromastyx dispar	Agamidae	17	captive	167.372	Diurnal	Terrestrial	N	NA	Questionable	25:(https://cites.org/sites/default/files/eng/com/ac/22/E22-10-2-A6c.pdf); Tacutu et al. 2013: 17
Smaug giganteus	Cordylidae	24.9	captive	115.207	Diurnal	Terrestrial	N	6	low	25-35:(http://wiredspace.wits.ac.za/xmlui/bitstream/handle/10539/14925/Shivan%20Parus th_MSc%20Dissertation_Fi l%20Submission.pdf?sequence=2&isAllowed=y); Carey and Judge 2000, De Magalhaes & Costa 2009: 24.9, Honegger 1969, Slavens and Slavens 1999
Leiocephalus personatus	Leiocephalidae	7	captive	4.80668	Diurnal	Terrestrial	Y	1	low	5-7:(http://www.fishpondinfo.com/animals/curly.htm), 3.3:(Slavens and Slavens 1999), (Henderson & Powell 2009: 3 and 4 months)
Lepidothyris fernandi	Scincidae	10	captive	36.6484	Cathemeral	Terrestrial	N	2	low	6: (Hauschild, Andree/Paul Ga?ner, 1995),(Slavens and Slavens 1999: 2, Hauschild and Gassner 1995: >5)
Egernia cunninghami	Scincidae	40	captive	58.936	Diurnal	Terrestrial	N	550	high	8: (Heatwole and Taylor 1987), Carey and Judge 2000: 20, De Magalhaes & Costa 2009, Brown 2012 and Slavens and Slavens 1999: 26.5, Chapple 2003: >20, Greer 2005: 15, Greer 1989: 19 and 11 months, Wilson 2012: 40; Petzold 2008: 16
Diplodactylus galeatus	Diplodactylidae	10	captive	2.70404	Nocturnal	Terrestrial	N	NA	Questionable	8-10 (Porter 2008)
Bunopus blanfordii	Gekkonidae	6	captive	1.55676	Cathemeral	Terrestrial	N	6	low	Amitai and Bouskila 2001, Werner et al. 1993 (1 year, 11 months); TAUM: 6
Mediodactylus amictopholis	Gekkonidae	3	captive	0.828315	Diurnal	Terrestrial	N	4	low	Amitai and Bouskila 2001, Werner et al. 1993 (2 years 9 months in captivity, then it ran away)
Stenodactylus doriae	Gekkonidae	8.11	captive	3.97769	Nocturnal	Terrestrial	N	13	low	Amitai and Bouskila 2001: > 8, Werner et al. 1993: 8 years, 10 months; TAU museum records: 8 years and 11 months, Yael Olek pers comm.: usually 3 years
Ptyodactylus puiseuxi	Phyllodactylidae	8.3	captive	6.1156	Diurnal	Terrestrial	N	2	low	Amitai and Bouskila 2001: 5; Werner et al. 1993: 5 years, 3 months; TAU museum records: 8 years and 4 months, Werner & Sivan 1994: a specimen caught as adult lived 5 years and four month, Werner 2016: max 7.5 years
Stenodactylus sthenodactylus	Gekkonidae	9.1	captive	2.27078	Nocturnal	Terrestrial	N	20	low	Amitai and Bouskila 2001: 8, Werner et al. 1993: 4 years, 8 months; Hughes 1988: 4 and 3 months, Slavens and Slavens 1999: 4 years, 3 months; TAU museum records: 9 years and 1 months
Tropiocolotes nattereri	Gekkonidae	2.8	captive	0.389157	Nocturnal	Terrestrial	N	2	low	Amitai and Bouskila 2001; TAU museum records: 2 years and 8 months
Dixonius hangseesom	Gekkonidae	10.2	captive	1.24676	Nocturnal	Terrestrial	N	NA	Questionable	Bauer et al. 2004
Takydromus tachydromoides	Lacertidae	9	captive	3.53474	Diurnal	Terrestrial	Y	347	high	Bogin et al. 1999: 7-9 years, Bauwens and Diaz-Uriarte 1997: 25 months
Darevskia praticola	Lacertidae	8.6	captive	3.37996	Diurnal	Terrestrial	N	NA	Questionable	Bogin et al. 1999: 8.6
Algyroides moreoticus	Lacertidae	9.2	captive	2.41479	Diurnal	Terrestrial	N	1	low	Bogin et al. 1999: 9 years, 2 months
Salvator merianae	Teiidae	20	captive	1481.27	Diurnal	Terrestrial	N	NA	Questionable	Britto et al. 2001: an adult survived for 17 years and 3 months, so I write 20
Cyrtodactylus tuberculatus	Gekkonidae	10	captive	23.7038	Nocturnal	Terrestrial	N	NA	Questionable	Brown 2012: 10
Nephrurus amyae	Carphodactylidae	13	captive	40.3674	Nocturnal	Terrestrial	N	1	low	Brown 2012: 13 (collected as adult 1997, still living and breeding 2008)
Stenodactylus petrii	Gekkonidae	13.1	captive	3.72707	Nocturnal	Terrestrial	N	22	low	Carey and Judge 2000, Amitai and Bouskila 2001: 14 months, Barak Levi, pers. comm. - at least 5 years, Werner et al. 1993: 1 year, 2 months; TAU museum records: 13 years and 1 months
Ptyodactylus hasselquistii	Phyllodactylidae	14.7	captive	8.70012	Cathemeral	Terrestrial	N	55	acceptable	Carey and Judge 2000, De Magalhaes & Costa 2009, Amitai and Bouskila 2001 (12), de Espinoza et al. 1990 (12), Werner et al. 1993: 12 years, 7 months; Hughes 1988, Slavens and Slavens 1999: 10 and 11 months, 10.45 (Hallmann and Griebeler 2015), Werner & Sivan 1994: a specimen caught as adult lived 11 years and 11 months(so at least 13.33), Werner 2016 (at least 14 and 7 months)
Gallotia galloti	Lacertidae	15	captive	21.538	Diurnal	Terrestrial	Y	55	acceptable	Carey and Judge 2000, De Magalhaes & Costa 2009, Castanet 1994: 8; Slavens and Slavens 1999: 5, Jesus 2012: 15, Castanet and Baez 1991: 9, Moli -Borja and Rodriguez-Dominguez 2004: 7 and 1 month
Uma notata	Phrynosomatidae	8.1	captive	24.6913	Diurnal	Terrestrial	N	55	acceptable	Carey and Judge 2000, De Magalhaes & Costa 2009, Slavens and Slavens 1999
Eumeces algeriensis	Scincidae	28.8	captive	43.1222	Diurnal	Terrestrial	N	55	acceptable	Carey and Judge 2000, De Magalhaes & Costa 2009, Slavens and Slavens 1999 (all 22 and 10 months); TAU museum records: 28 years and 9 months
Leiocephalus carinatus	Leiocephalidae	10.1	captive	23.9544	Diurnal	Terrestrial	Y	55	acceptable	Carey and Judge 2000, De Magalhaes & Costa 2009, Slavens and Slavens 1999, Henderson & Powell 2009: 10 and 10 months
Cyclura cornuta	Iguanidae	22.9	captive	5375.49	Diurnal	Terrestrial	Y	550	high	Carey and Judge 2000, De Magalhaes & Costa 2009, Slavens and Slavens 1999, Henderson & Powell 2009: 22 and 11 months, Petzold 2008: 7.5
Broadleysaurus major	Gerrhosauridae	24	captive	193.343	Diurnal	Terrestrial	N	550	high	Carey and Judge 2000, De Magalhaes & Costa 2009, Slavens and Slavens 1999, Hughes 1988: 16, Loveridge 1942: 7 years, 2 months; Petzold 2008: 10 & 2 months
Leiolepis belliana	Agamidae	5.6	captive	18.3492	Diurnal	Terrestrial	N	10	low	Carey and Judge 2000, De Magalhaes & Costa 2009, Slavens and Slavens 1999, Snider and Bowler 1992: 5 and 7 months
Salvator rufescens	Teiidae	10.8	captive	1929.8	Diurnal	Terrestrial	N	55	acceptable	Carey and Judge 2000, De Magalhaes & Costa 2009, Slavens and Slavens 1999: 10 and 9 months
Tiliqua gigas	Scincidae	17.3	captive	508.275	Diurnal	Terrestrial	Y	550	high	Carey and Judge 2000, De Magalhaes & Costa 2009, Slavens and Slavens 1999: 17.3
Varanus giganteus	Varanidae	19.7	captive	5585.21	Diurnal	Terrestrial	N	55	acceptable	Carey and Judge 2000, De Magalhaes & Costa 2009, Slavens and Slavens 1999: 19 and 8 months
Tiliqua scincoides	Scincidae	30	captive	499.704	Diurnal	Terrestrial	N	1000	high	Carey and Judge 2000, De Magalhaes & Costa 2009, Slavens and Slavens 1999: 26 and 7 months, Geer 2005: 14, Greer 1989: 17, Wilson and Swan 2009: 30 years
Ameiva ameiva	Teiidae	4.7	captive	51.446	Diurnal	Terrestrial	N	55	acceptable	Carey and Judge 2000, De Magalhaes & Costa 2009, Slavens and Slavens 1999: 4 and 7 months,("Index of Scientific Binomi ls", 2002; Bowler, 1975):4.6
Varanus gouldii	Varanidae	18.3	captive	631.239	Diurnal	Terrestrial	N	550	high	Carey and Judge 2000, De Magalhaes & Costa 2009, Slavens and Slavens 1999:18 and 3 months, Greer 1989: 6 and 10 months
Eublepharis macularius	Eublepharidae	29	captive	9.66583	Nocturnal	Terrestrial	N	1000	high	Carey and Judge 2000, De Magalhaes & Costa 2009, Werner et al. 1993: 22 years, 4 months, Slavens and Slavens 1999: 28.5, Rogner 1997: 22; Bauer 2013: 29; Seufer et al. 2005 24.2,(Hallmann & Griebeler 2015): 24.25
Tarentola annularis	Phyllodactylidae	19.9	captive	16.9791	Nocturnal	Terrestrial	N	550	high	Carey and Judge 2000, De Magalhaes & Costa 2009, Werner et al. 1993: 8 years, 8 months; Slavens and Slavens 1999: 11 years, 10 months, Hughes 1988: 8.67; TAU museum records: 19 years and 10 months
Tiliqua nigrolutea	Scincidae	18	captive	369.606	Diurnal	Terrestrial	N	55	acceptable	Carey and Judge 2000, De Magalhaes & Costa 2009: 11.5; Slavens and Slavens 1999: 7 and 4 months, Hauschild and Gassner 1995: 18
Teratoscincus scincus	Sphaerodactylidae	13	captive	9.17459	Nocturnal	Terrestrial	N	550	high	Carey and Judge 2000, De Magalhaes & Costa 2009: 12.6, Werner et al. 1993: 12 years, 7 months; Slavens and Slavens 1999: 13
Platysaurus imperator	Cordylidae	14	captive	25.5081	Diurnal	Terrestrial	N	10	low	Carey and Judge 2000, De Magalhaes & Costa 2009: 14, Slavens and Slavens 1999
Cordylus cordylus	Cordylidae	15.7	captive	8.69787	Diurnal	Terrestrial	N	55	acceptable	Carey and Judge 2000, De Magalhaes & Costa 2009: 15.6, Slavens and Slavens 1999
Platysaurus guttatus	Cordylidae	15.7	captive	13.4416	Diurnal	Terrestrial	N	10	low	Carey and Judge 2000, De Magalhaes & Costa 2009: 15.7, Slavens and Slavens 1999
Smaug warreni	Cordylidae	19.9	captive	38.9009	Diurnal	Terrestrial	N	550	high	Carey and Judge 2000, De Magalhaes & Costa 2009: 19.8, Slavens and Slavens 1999
Gerrhosaurus nigrolineatus	Gerrhosauridae	8.3	captive	23.8555	Diurnal	Terrestrial	N	1	low	Carey and Judge 2000, Slavens and Slavens 1999
Pseudocordylus microlepidotus	Cordylidae	2.8	captive	34.0278	Diurnal	Terrestrial	N	2	low	Carey and Judge 2000, Slavens and Slavens 1999
Sphaerodactylus notatus	Sphaerodactylidae	1.3	captive	0.557127	Diurnal	Terrestrial	Y	1	low	Carey and Judge 2000, Slavens and Slavens 1999
Hyalosaurus koellikeri	Anguidae	9.4	captive	33.2671	Nocturnal	Terrestrial	N	1	low	Carey and Judge 2000, Slavens and Slavens 1999
Phrynosoma douglasii	Phrynosomatidae	7.3	captive	10.4471	Diurnal	Terrestrial	N	1	low	Carey and Judge 2000, Slavens and Slavens 1999: 1, weird as it takes 2 years to reach maturity, Montanucci 1983: 5.25 in captivity as adult, so as it takes 2 years to reach adulthood I write 7.25
Varanus spenceri	Varanidae	15	captive	1469.03	Diurnal	Terrestrial	N	1	low	Carey and Judge 2000, Slavens and Slavens 1999: 4 and 3 months
Tiliqua rugosa	Scincidae	35	captive	366.561	Diurnal	Terrestrial	N	4	low	Carey and Judge 2000: 14.5; Slavens and Slavens 1999: 20 and 10 months, Greer 2005: 12, Greer 1989: 20, (C. Michael Bull):50
Ctenotus labillardieri	Scincidae	2	captive	5.29484	Diurnal	Terrestrial	N	NA	Questionable	Carey and Judge 2000: 2
Tarentola delalandii	Phyllodactylidae	7	captive	3.31705	Cathemeral	Terrestrial	Y	2	low	Carey and Judge 2000: 2.4; Werner et al. 1993: 7; Hughes 1988, Slavens and Slavens 1999: 3.75
Podarcis filfolensis	Lacertidae	2.8	captive	6.55808	Diurnal	Terrestrial	Y	NA	Questionable	Carey and Judge 2000: 2.8
Teratoscincus microlepis	Sphaerodactylidae	11.2	captive	6.41014	Nocturnal	Terrestrial	N	5	low	Carey and Judge 2000: 3.1, Werner et al. 1993: 3 years 2 months; Slavens and Slavens 1999: 3 and 1 month, TAU museum records: 11.17
Mesalina rubropunctata	Lacertidae	4	captive	2.64663	Diurnal	Terrestrial	N	1	low	Carey and Judge 2000: 3.3; Bogin et al. 1999: 3 years, 4 months; Slavens and Slavens 1999: 3 and 4 months; TAU museum records: 4 years
Coleonyx variegatus	Eublepharidae	15.2	captive	1.23524	Nocturnal	Terrestrial	N	55	acceptable	Carey and Judge 2000: 34.8 but cites Bowler 1977 and Snider and Bowler 1992 give 15.2 , De Magalhaes & Costa 2009: 15.2 , Stebbins and McGinnis 2012: over 14 , Werner et al. 1993 (14 years, 2 months), Slavens and Slavens 1999: 15 years, 2 months; Seufer et al. 2005 (14 1 month, 26 days and 15 and 2 months)
Karusasaurus polyzonus	Cordylidae	11.1	captive	21.7556	Diurnal	Terrestrial	N	2	low	Carey and Judge 2000: 9.1; Slavens and Slavens 1999: 11 years, 1 month
Gallotia stehlini	Lacertidae	13	captive	148.869	Diurnal	Terrestrial	Y	1	low	Castanet 1994: 12; Jesus 2012: 13, Moli -Borja and Rodriguez-Dominguez 2004: 145 months, Hallmann & Griebeler 2015: 13 months
Podarcis hispanicus	Lacertidae	13	captive	3.58405	Diurnal	Terrestrial	N	NA	Questionable	Castanet 1994: 3; Jesus 2012: 13, Bauwens and Diaz-Uriarte 1997: 19 months
Phrynosoma modestum	Phrynosomatidae	5	captive	6.51551	Cathemeral	Terrestrial	N	NA	Questionable	close to 5 years (Degenhardt et al. 1996, Lemos-Espi l and Dixon 2013), 2-3 years (Sherbrook 2003)
Sauromalus varius	Iguanidae	11.4	captive	1010.59	Diurnal	Terrestrial	N	550	high	De Magalhaes & Costa 2009, Slavens and Slavens 1999
Xantusia henshawi	Xantusiidae	14.3	captive	3.83755	Cathemeral	Terrestrial	N	10	low	De Magalhaes & Costa 2009, Slavens and Slavens 1999: 14 and 4 months
Chondrodactylus angulifer	Gekkonidae	10.8	captive	12.9453	Nocturnal	Terrestrial	N	55	acceptable	De Magalhaes & Costa 2009: 10.8; Werner et al. 1993, Hughes 1988: 7 years, 5 months, Slavens and Slavens 1999 (10 years, 10 months)
Underwoodisaurus milii	Carphodactylidae	18	captive	2.77154	Nocturnal	Terrestrial	N	55	acceptable	De Magalhaes & Costa 2009: 12, Slavens and Slavens 1999: 12, Brown 2012: exceptio l cases of specimens breeding at 18 years of age
Diploglossus monotropis	Diploglossidae	12.3	captive	121.31	Diurnal	Terrestrial	N	55	acceptable	De Magalhaes & Costa 2009: 12.3 (also Corry et al. 2010)
Cyclodomorphus gerrardii	Scincidae	12.9	captive	174.138	Cathemeral	Terrestrial	N	55	acceptable	De Magalhaes & Costa 2009: 12.9; Slavens and Slavens 1999: 9 and 11 months, Greer 1989: 9
Pseudopus apodus	Anguidae	54	captive	143.013	Diurnal	Terrestrial	N	550	high	De Magalhaes & Costa 2009: 54
Sceloporus poinsettii	Phrynosomatidae	8	captive	33.2786	Diurnal	Terrestrial	N	55	acceptable	Degenhardt et al. 1996 write they can reproduce 3 times in their lifetime; Slavens and Slavens 1999: 8
Phymaturus palluma	Liolaemidae	12	captive	22.1089	Diurnal	Terrestrial	N	6	low	Eisenberg and Werning 2012: 12
Delma inornata	Pygopodidae	5	captive	5.17331	Cathemeral	Terrestrial	N	NA	Questionable	Greer 1989: >5
Pygopus nigriceps	Pygopodidae	7	captive	9.76134	Nocturnal	Terrestrial	N	NA	Questionable	Greer 1989: 7 (also Petzold 2008)
Oligosoma lichenigera	Scincidae	7	captive	6.32705	Cathemeral	Terrestrial	Y	1	low	Greer 1989: 8
Cyclodomorphus michaeli	Scincidae	11	captive	27.4273	Cathemeral	Terrestrial	N	NA	Questionable	Greer 2005:10 years (Shea, 1998).
Agama etoshae	Agamidae	2.1	captive	8.76635	Diurnal	Terrestrial	N	1	low	Hughes 1988, Slavens and Slavens 1999
Pachydactylus bicolor	Gekkonidae	1.1	captive	0.883667	Nocturnal	Terrestrial	N	1	low	Hughes 1988, Slavens and Slavens 1999:1 and 1
Pachydactylus purcelli	Gekkonidae	1.5	captive	1.57521	Nocturnal	Terrestrial	N	1	low	Hughes 1988, Werner et al. 1993, Slavens and Slavens 1999: 1 and 5 months
Pachydactylus maculatus	Gekkonidae	3.2	captive	1.92861	Nocturnal	Terrestrial	N	1	low	Hughes 1988, Werner et al. 1993, Slavens and Slavens 1999: 3 and 2 months
Pachydactylus geitje	Gekkonidae	3.6	captive	1.17406	Nocturnal	Terrestrial	N	1	low	Hughes 1988, Werner et al. 1993, Slavens and Slavens 1999: 3.6
Pachydactylus acuminatus	Gekkonidae	1.5	captive	1.95808	Nocturnal	Terrestrial	N	NA	Questionable	Hughes 1988: 1 and 5 months
Agama caudospinosa	Agamidae	9.6	captive	47.8111	Diurnal	Terrestrial	N	28	low	Hughes 1988: over 6 in TAU zoo, TAUM museum records: 9.6
Phrynosoma blainvillii	Phrynosomatidae	10	captive	13.951	Diurnal	Terrestrial	N	NA	Questionable	Jennings and Hayes 1994: >8
Correlophus ciliatus	Diplodactylidae	20	captive	23.2514	Nocturnal	Terrestrial	Y	NA	Questionable	Jepson 2014: animals brought from ture in 1994 are still alive (2014), ADW: ("Crested Gecko", 2013; De Vosjoli, 2003; Whitaker and Sadlier, 2011):20
Lacerta bilineata	Lacertidae	13	captive	23.6025	Diurnal	Terrestrial	N	NA	Questionable	Jesus 2012
Gallotia caesaris	Lacertidae	12	captive	11.3286	Diurnal	Terrestrial	Y	1	low	Jesus 2012: 12, Castanet and Baez 1991: 6, Moli -Borja and Rodriguez-Dominguez 2004: 61 months
Podarcis tiliguerta	Lacertidae	15	captive	5.33759	Diurnal	Terrestrial	Y	NA	Questionable	Jesus 2012: 15
Lepidophyma smithii	Xantusiidae	5	captive	17.9183	Cathemeral	Terrestrial	N	24	low	Mautz and Lopez-Forment 1978: 5, Flores-Villela and Rubio-Perez 2008: 5
Brookesia stumpffi	Chamaeleonidae	4	captive	2.18903	Diurnal	Terrestrial	Y	NA	Questionable	Necas 1999: 3-4
Sphaerodactylus pimienta	Sphaerodactylidae	2	captive	0.864956	Diurnal	Terrestrial	Y	NA	Questionable	Regalado 2006:4
Pedioplanis lineoocellata	Lacertidae	5	captive	4.41208	Diurnal	Terrestrial	N	NA	Questionable	Rogner 1997: 4-5
Varanus flavescens	Varanidae	10.5	captive	752.142	Diurnal	Terrestrial	N	1	low	Schleich and Kastle 2002: more than 10 years; Slavens and Slavens 1999: 4 and 6 months; King & Green 1999: 10 and 6 months
Atlantolacerta andreanskyi	Lacertidae	17	captive	2.39956	Diurnal	Terrestrial	N	NA	Questionable	Schleich et al. 1996: 4 in ture, at least 5; Petzold 2008: 17+
Trachylepis brevicollis	Scincidae	2.5	captive	23.7825	Cathemeral	Terrestrial	N	1	low	Slavens and Slavens 1999
Oligosoma aeneum	Scincidae	8	captive	2.11309	Diurnal	Terrestrial	Y	1	low	Slavens and Slavens 1999
Cordylus vittifer	Cordylidae	7.6	captive	3.29197	Diurnal	Terrestrial	N	1	low	Slavens and Slavens 1999
Plestiodon tetragrammus	Scincidae	3.9	captive	4.15643	Diurnal	Terrestrial	N	1	low	Slavens and Slavens 1999
Trachylepis sulcata	Scincidae	2.9	captive	5.31857	Diurnal	Terrestrial	N	1	low	Slavens and Slavens 1999
Sphenomorphus indicus	Scincidae	6	captive	6.4808	Diurnal	Terrestrial	N	70	acceptable	Slavens and Slavens 1999
Platysaurus capensis	Cordylidae	7.4	captive	8.83844	Diurnal	Terrestrial	N	1	low	Slavens and Slavens 1999
Ninurta coeruleopunctatus	Cordylidae	3.2	captive	9.74433	Diurnal	Terrestrial	N	1	low	Slavens and Slavens 1999
Trachylepis capensis	Scincidae	3.5	captive	10.1372	Diurnal	Terrestrial	N	1	low	Slavens and Slavens 1999
Namazonurus peersi	Cordylidae	4	captive	10.8028	Diurnal	Terrestrial	N	1	low	Slavens and Slavens 1999
Mesaspis moreletii	Anguidae	2.83333	captive	12.2973	Diurnal	Terrestrial	N	1	low	Slavens and Slavens 1999
Pseudocordylus spinosus	Cordylidae	1.8	captive	12.5216	Diurnal	Terrestrial	N	1	low	Slavens and Slavens 1999
Cnemidophorus arubensis	Teiidae	2	captive	16.5846	Diurnal	Terrestrial	Y	1	low	Slavens and Slavens 1999
Hemicordylus capensis	Cordylidae	3.3	captive	16.7396	Diurnal	Terrestrial	N	1	low	Slavens and Slavens 1999
Plestiodon chinensis	Scincidae	6.9	captive	20.618	Diurnal	Terrestrial	N	1	low	Slavens and Slavens 1999
Chamaesaura aenea	Cordylidae	1.8	captive	24.5804	Diurnal	Terrestrial	N	1	low	Slavens and Slavens 1999
Holcosus undulatus	Teiidae	2	captive	28.4642	Diurnal	Terrestrial	N	1	low	Slavens and Slavens 1999
Chamaesaura macrolepis	Cordylidae	1.3	captive	32.5606	Diurnal	Terrestrial	N	1	low	Slavens and Slavens 1999
Chamaeleo namaquensis	Chamaeleonidae	1.4	captive	34.5743	Diurnal	Terrestrial	N	1	low	Slavens and Slavens 1999
Ophisaurus compressus	Anguidae	3.3	captive	35.0741	Diurnal	Terrestrial	N	1	low	Slavens and Slavens 1999
Smaug vandami	Cordylidae	7.91667	captive	35.7548	Diurnal	Terrestrial	N	1	low	Slavens and Slavens 1999
Smaug breyeri	Cordylidae	5.91667	captive	37.9898	Diurnal	Terrestrial	N	1	low	Slavens and Slavens 1999
Gerrhosaurus typicus	Gerrhosauridae	2.4	captive	42.7833	Diurnal	Terrestrial	N	1	low	Slavens and Slavens 1999
Smaug regius	Cordylidae	7.2	captive	44.3242	Diurnal	Terrestrial	N	1	low	Slavens and Slavens 1999
Callopistes maculatus	Teiidae	5	captive	61.1634	Diurnal	Terrestrial	N	1	low	Slavens and Slavens 1999
Zonosaurus laticaudatus	Gerrhosauridae	8.91667	captive	84.2885	Diurnal	Terrestrial	Y	1	low	Slavens and Slavens 1999
Gerrhosaurus multilineatus	Gerrhosauridae	8.3	captive	103.923	Diurnal	Terrestrial	N	1	low	Slavens and Slavens 1999
Tiliqua occipitalis	Scincidae	7.4	captive	345.716	Diurnal	Terrestrial	N	1	low	Slavens and Slavens 1999
Callopistes flavipunctatus	Teiidae	4.3	captive	505.777	Diurnal	Terrestrial	N	1	low	Slavens and Slavens 1999
Saurodactylus mauritanicus	Sphaerodactylidae	3.7	captive	0.557127	Diurnal	Terrestrial	N	2	low	Slavens and Slavens 1999
Phelsuma barbouri	Gekkonidae	5.2	captive	4.92876	Diurnal	Terrestrial	Y	1	low	Slavens and Slavens 1999
Oligosoma macgregori	Scincidae	20	captive	18.9026	Nocturnal	Terrestrial	Y	1	low	Slavens and Slavens 1999
Tarentola boettgeri	Phyllodactylidae	6.1	captive	3.85426	Nocturnal	Terrestrial	Y	1	low	Slavens and Slavens 1999
Gekko petricolus	Gekkonidae	8.8	captive	10.5752	Nocturnal	Terrestrial	N	1	low	Slavens and Slavens 1999
Oligosoma ornatum	Scincidae	13	captive	4.25797	Cathemeral	Terrestrial	Y	1	low	Slavens and Slavens 1999, Cree and Hare 2016: 13
Celestus costatus	Diploglossidae	12.4	captive	13.261	Diurnal	Terrestrial	Y	2	low	Slavens and Slavens 1999, Henderson & Powell 2009, Corry et al. 2010 (all 12.3)
Leiocephalus barahonensis	Leiocephalidae	4.8	captive	6.1647	Diurnal	Terrestrial	Y	1	low	Slavens and Slavens 1999, Henderson & Powell 2009: 4.8, in captivity
Gerrhosaurus flavigularis	Gerrhosauridae	11.3	captive	56.0766	Diurnal	Terrestrial	N	2	low	Slavens and Slavens 1999, Loveridge 1942: 11 and 3 months
Elgaria kingii	Anguidae	15	captive	11.4535	Diurnal	Terrestrial	N	55	acceptable	Slavens and Slavens 1999: 12.4
Agama hartmanni	Agamidae	2.1	captive	13.5314	Diurnal	Terrestrial	N	1	low	Slavens and Slavens 1999: 2 years, 1 months
Leiocephalus schreibersii	Leiocephalidae	10	captive	8.71064	Diurnal	Terrestrial	Y	1	low	Slavens and Slavens 1999: 5 and 7 months, Henderson & Powell 2009: 9-10 years
Trachylepis hoeschi	Scincidae	5.3	captive	7.22039	Diurnal	Terrestrial	N	1	low	Slavens and Slavens 1999: 5.33; Hughes 1988: 5
Trachylepis occidentalis	Scincidae	6.9	captive	9.28745	Diurnal	Terrestrial	N	1	low	Slavens and Slavens 1999: 6.9; Hughes 1988: more than 5
Platysaurus intermedius	Cordylidae	13.5	captive	10.3978	Diurnal	Terrestrial	N	2	low	Slavens and Slavens 1999:6.2 ; TAU museum records: 13 years and 5 months
Uromastyx ornata	Agamidae	18	captive	89.8381	Diurnal	Terrestrial	N	56	acceptable	TAU museum records: 18
Pachydactylus vanzyli	Gekkonidae	3.8	captive	3.11503	Nocturnal	Terrestrial	N	3	low	TAU museum records: 3 years & 10 months
Trapelus agilis	Agamidae	3.1	captive	13.8138	Diurnal	Terrestrial	N	1	low	TAU museum records: 3 years and 1 month
Podarcis melisellensis	Lacertidae	3.9	captive	5.1812	Diurnal	Terrestrial	N	15	low	TAU museum records: 3 years and 11 months
Agama rueppelli	Agamidae	3.2	captive	8.92209	Diurnal	Terrestrial	N	3	low	TAU museum records: 3 years and 2 months
Podarcis siculus	Lacertidae	13	captive	6.19489	Diurnal	Terrestrial	N	2	low	TAU museum records: 3 years and 8 months, 13 (Hallmann and Griebeler 2015)
Dalmatolacerta oxycephala	Lacertidae	3.9	captive	4.80445	Diurnal	Terrestrial	N	4	low	TAU museum records: 3 years and 9 months
Agama mwanzae	Agamidae	4	captive	29.9343	Diurnal	Terrestrial	N	20	low	TAU museum records: 4 years
Liolaemus nitidus	Liolaemidae	4.5	captive	16.9492	Diurnal	Terrestrial	N	2	low	TAU museum records: 4 years and 6 months
Trapelus mutabilis	Agamidae	4.9	captive	7.10297	Diurnal	Terrestrial	N	2	low	TAU museum records: 4 years and 9 months
Darevskia saxicola	Lacertidae	5.83333	captive	5.64294	Diurnal	Terrestrial	N	17	low	TAU museum records: 5 years and 10 months
Trapelus savignii	Agamidae	5.5	captive	12.7085	Diurnal	Terrestrial	N	16	low	TAU museum records: 5 years and 5 months
Laudakia tuberculata	Agamidae	7.4	captive	38.0284	Diurnal	Terrestrial	N	3	low	TAU museum records: 7 years and 5 months
Laudakia nupta	Agamidae	8.9	captive	72.9918	Diurnal	Terrestrial	N	1	low	TAU museum records: 8 years and 11 months
Ablepharus rueppellii	Scincidae	8.3	captive	0.684142	Diurnal	Terrestrial	N	1	low	TAU museum records: 8 years and 3 months
Trapelus agnetae	Agamidae	2.6	captive	8.78976	Diurnal	Terrestrial	N	17	low	TAUM 13518 died 2 years and 7 months after collection
Mesalina guttulata	Lacertidae	4.4	captive	2.25462	Diurnal	Terrestrial	N	15	low	TAUM museum records: 4.4
Diplodactylus vittatus	Diplodactylidae	3	captive	2.5351	Nocturnal	Terrestrial	N	1	low	Werner et al. 1993
Lucasium damaeum	Diplodactylidae	6.8	captive	2.74264	Nocturnal	Terrestrial	N	3	low	Werner et al. 1993
Ptyodactylus oudrii	Phyllodactylidae	3.7	captive	2.82335	Nocturnal	Terrestrial	N	1	low	Werner et al. 1993
Tarentola fascicularis	Phyllodactylidae	2.5	captive	3.63112	Nocturnal	Terrestrial	N	3	low	Werner et al. 1993
Afroedura transvaalica	Gekkonidae	2.08	captive	3.56494	Nocturnal	Terrestrial	N	2	low	Werner et al. 1993 and Hughes 1988; Slavens and Slavens 1999: 1 year, one month
Pachydactylus namaquensis	Gekkonidae	1.91667	captive	8.59514	Cathemeral	Terrestrial	N	1	low	Werner et al. 1993, Slavens and Slavens 1999
Afroedura africana	Gekkonidae	3.7	captive	3.47176	Diurnal	Terrestrial	N	2	low	Werner et al. 1993, Slavens and Slavens 1999, Hughes 1988: 3 years and 7 months
Ptenopus garrulus	Gekkonidae	7.4	captive	2.24943	Nocturnal	Terrestrial	N	1	low	Werner et al. 1993: 1.75; Slavens and Slavens 1999: 4; ; TAU museum records: 7 years and 5 months
Nephrurus asper	Carphodactylidae	10	captive	4.61719	Nocturnal	Terrestrial	N	NA	Questionable	Werner et al. 1993: 10, Rogner 1997: 8-10
Ptyodactylus ragazzii	Phyllodactylidae	10.5	captive	11.8402	Cathemeral	Terrestrial	N	1	low	Werner et al. 1993: 10; Slavens and Slavens 1999: 10.5
Pachydactylus weberi	Gekkonidae	2.8	captive	1.64972	Nocturnal	Terrestrial	N	NA	Questionable	Werner et al. 1993: 2; Hughes 1988: 2 and 8 months
Garthia gaudichaudii	Phyllodactylidae	5.2	captive	0.960168	Nocturnal	Terrestrial	N	8	low	Werner et al. 1993: 5 and 2 months; Slavens and Slavens 1999: 2 and 8 months
Rhoptropus bradfieldi	Gekkonidae	6.9	captive	2.7832	Diurnal	Terrestrial	N	NA	Questionable	Werner et al. 1993: 6; Hughes 1988: 6 and 11 months
Amalosia lesueurii	Diplodactylidae	9.5	captive	5.45763	Nocturnal	Terrestrial	N	1	low	Werner et al. 1993: 8 in captivity (see Petzold 2008)
Homonota whitii	Phyllodactylidae	5.6	captive	1.089	Nocturnal	Terrestrial	N	1	low	Werner et al. 1993: still living at 5 years, 7 months of age
Homonota underwoodi	Phyllodactylidae	5.6	captive	1.86582	Nocturnal	Terrestrial	N	10	low	Werner et al. 1993: still living at 5 years, 7 months of age
Liopholis whitii	Scincidae	13.8	captive	12.105	Diurnal	Terrestrial	N	1	low	While et al. 2009, Chapple 2003: 10; Slavens and Slavens 1999: 12.75, Greer 2005: 3, Brown 2012: 13, Hauschild and Gassner 1995: 8; Petzold 2008: 13, 7 months & 25 days
Uromastyx ocellata	Agamidae	16	captive	76.9425	Diurnal	Terrestrial	N	1	low	Wilms 2005: 3.75, 16 years for a female bought as an adult, so I write 16
Saara asmussi	Agamidae	7.5	captive	454.402	Diurnal	Terrestrial	N	1	low	Wilms 2005: 6.5 years as adult, so I write 7.5
Uromastyx benti	Agamidae	8	captive	140.935	Diurnal	Terrestrial	N	1	low	Wilms 2005: 7 years as adult so I write 8
Gerrhonotus parvus	Anguidae	6	captive	8.4759	Diurnal	Terrestrial	N	1	low	Zaldivar Riveron et al. 2002: kept in captivity for 5 years, assuming it takes at least a year to mature (specimen was a gravid female) I list 6
Varanus griseus	Varanidae	21	captive	961.195	Diurnal	Terrestrial	N	55	acceptable	14: (Werner 2016) 17: (Werner, according to Hughes 1988), Schleich et al. 1996 and Slavens and Slavens 1999, Castanet 1994, >20(Amitai and Bouskila 2001); Petzold 2008: 17 in TAUZ; 17.
Anomalopus verreauxii	Scincidae	7	captive	67.0168	Diurnal	Terrestrial	N	NA	Questionable	Brown 2012: >7
Sauromalus ater	Iguanidae	65	captive	196.048	Diurnal	Terrestrial	N	55	acceptable	(Abts, 1987; Friends of the Rosamond Gifford Zoo Education Volunteers, 2008; Johnson, 1965; Montanucci, 1997; Sullivan and Sullivan, 2008):30 De Magalhaes & Costa 2009, probably over 25 (Stebbins and McGinnis 2012), Sullivan and Sullivan 2012 (17, estimate: 30 and one near 40), ADW:(http://animaldiversity.org/accounts/Sauromalus_ater/#lifespan_longevity):65 in captvity, 30 in the wild
Cyclura lewisi	Iguanidae	69	captive	4262.56	Diurnal	Terrestrial	Y	1	low	(Adams, 2004; Blair, 1991) at least 54, estimated 69: (Henderson and Powell 2009), ADW:( Adams, 2004; Blair, 1991):69
Zootoca vivipara	Lacertidae	12	captive	4.08672	Diurnal	Terrestrial	N	327	high	(Avery, 1975; Crews and Gans, 1992) Castanet 1994, Jesus 2012: 5, Bauwens and Diaz-Uriarte 1997: 32 months, Yakin and Tok 2015: 4 ( ture), Petzold 2008: 5 ( ture) but 12 (captivity), Hallmann and Griebeler 2015 (11)
Chalcides lanzai	Scincidae	6	captive	9.37748	Diurnal	Terrestrial	N	NA	Questionable	(Bogaerts, 2006) at least 6 (Bogaerts 2006)
Phymaturus antofagastensis	Liolaemidae	20	captive	20.9236	Diurnal	Terrestrial	N	28	low	(Boretto et al. 2017):females and males of P. antofagastensis mature late in life, at 6–7 years old, respectively, and some individuals reached 20 years of age.
Podarcis gaigeae	Lacertidae	5	wild	6.88386	Diurnal	Terrestrial	Y	175	high	(Cooper Jr et al. 2014)
Aspidoscelis sexlineatus	Teiidae	6	captive	8.62548	Diurnal	Terrestrial	N	1	low	(Degenhardt et al. 1996) TAU museum records: 5 years and 6 months, A ge:(http://genomics.senescence.info/species/biblio.php?id=528):6
Cnemidophorus vanzoi	Teiidae	5.3	captive	24.0314	Diurnal	Terrestrial	Y	1	low	(Dickinson and Fa, 2000) Slavens and Slavens 1999 report 4 years and 15 months - not sure how much they mean it…., 5 years 3 months (Henderson and Powell 2009, in captivity)
Agama impalearis	Agamidae	6	captive	29.5927	Diurnal	Terrestrial	N	55	acceptable	(El Mouden et al., 1997) De Magalhaes & Costa 2009 (6), Slavens and Slavens 1999: 6, Hughes 1988: over 6 in TAU zoo,El Mouden et al. 1999: 5, TAU museum: 5 and 8 months
Podarcis tauricus	Lacertidae	10	wild	6.44426	Diurnal	Terrestrial	N	40	acceptable	(Eroglu et al. 2017):5-10 yr. (Altun???k et al. 2016):7 yr.
Coleonyx elegans	Eublepharidae	11	wild	3.74121	Nocturnal	Terrestrial	N	10	low	(Gibson et al. 2005) De Magalhaes & Costa 2009, Slavens and Slavens 1999
Ptyodactylus guttatus	Phyllodactylidae	10.9	captive	7.60848	Cathemeral	Terrestrial	N	14	low	(Greg johnston & Amos Bouskila, 2007) Amitai and Bouskila 2001, Werner et al. 1993 ( 7 years, 9 months); Slavens and Slavens 1999: 6 and 11 months, Yom-Tov in Hughes 1988: 10 years, 11 months (as hasselquistii), Werner & Sivan 1994: a specimen caught as adult lived 7 years and 10 months, Werner 2016 (9 years and 9 months)
Apathya cappadocica	Lacertidae	7	wild	7.78929	Diurnal	Terrestrial	N	56	acceptable	(Gul et al. 2015)
Iranolacerta brandtii	Lacertidae	6	wild	5.54453	Diurnal	Terrestrial	N	23	low	(gul et al. 2017): females age range 4-5 years, males range 3-6)
Holcosus quadrilineatus	Teiidae	2	wild	9.18297	Diurnal	Terrestrial	N	215	high	(Hirth 1963), rarely survive more than 2 (Savage 2002)
Oligosoma kokowai	Scincidae	8	wild	8.69315	Diurnal	Terrestrial	Y	NA	Questionable	(Hoare et al. 2005)
Plestiodon fasciatus	Scincidae	6	wild	5.23584	Diurnal	Terrestrial	N	2	low	(http://animaldiversity.org/accounts/Plestiodon_fasciatus/#lifespan_longevity) Slavens and Slavens 1999
Ophisaurus attenuatus	Anguidae	10	wild	66.7803	Diurnal	Terrestrial	N	3	low	(http://animals.howstuffworks.com/s kes/legless-lizard-vs-s ke1.htm); reaching adulthood in 3 yearsL(https://prezi.com/nnutqayckzdm/slender-glass-lizard/) Slavens and Slavens 1999
Lepidophyma flavimaculatum	Xantusiidae	11	wild	14.2284	Cathemeral	Terrestrial	N	10	low	(http://eol.org/pages/457244/details) Carey and Judge 2000, De Magalhaes & Costa 2009, Slavens and Slavens 1999: 11 years; Petzold 2008: 7
Pachydactylus rangei	Gekkonidae	8.8	captive	4.64382	Nocturnal	Terrestrial	N	3	low	(http://goodlifeherps.weebly.com/web-footed-gecko-pachydactylus-rangei.html) Werner et al. 1993: 4; Hughes 1988, Slavens and Slavens 1999: 2.33, TAUM museum records: 8.77; Kuhneli 1982: 2 years for an adult
Gallotia atlantica	Lacertidae	15	wild	7.16598	Diurnal	Terrestrial	Y	42	acceptable	(http://online-field-guide.com/Gallotiaatlantica.htm) Castanet 1994: 6, Jesus 2012: 12, Castanet and Baez 1991: 5, Moli -Borja and Rodriguez-Dominguez 2004: 50 months, 15 (Hallmann & Griebeler 2015)
Uromastyx acanthinura	Agamidae	26	captive	247.505	Diurnal	Terrestrial	N	550	high	(http://www.arkive.org/saharan-spiny-tailed-lizard/uromastyx-geyri/) Carey and Judge 2000, De Magalhaes & Costa 2009, Bringsoe 1998: 22, Wilms 2005: 26 years
Leiolopisma telfairii	Scincidae	12.2	wild	37.9398	Cathemeral	Terrestrial	Y	1	low	(http://www.darwininitiative.org.uk/documents/15038/21439/15-038%20FR%20Ann5.10%20Ranger%20info%20Telfair's%20skink.pdf) Slavens and Slavens 1999
Ouroborus cataphractus	Cordylidae	30	captive	23.377	Diurnal	Terrestrial	N	1	low	(http://www.globalspecies.org/ntaxa/1697374) De Magalhaes & Costa 2009, Slavens and Slavens 1999: 20.25; Fogel 2003: 25 or more; Petzold 2008: 30
Heloderma horridum	Helodermatidae	34.4	captive	1095.02	Cathemeral	Terrestrial	N	550	high	(http://www.helodermahorridum.com/beaded_lizard.php) Carey and Judge 2000, De Magalhaes & Costa 2009, Slavens and Slavens 1999, see Bogert and Martin del Campo 1956, Beck 2005: 37, Mitchell 2006: 44; Petzold 2008: 17,(http://animal-world.com/encyclo/reptiles/lizards_venomous/BeadedLizard.php):50
Anguis fragilis	Anguidae	54	captive	38.1214	Diurnal	Terrestrial	N	550	high	(http://www.wildlifetrusts.org/species/slow-worm) Carey and Judge 2000, De Magalhaes & Costa 2009, Slavens and Slavens 1999, Wilson 2012: all 54, Hallmann & Griebeler 2015: 44.33
Phrynosoma coronatum	Phrynosomatidae	8.3	captive	17.6822	Diurnal	Terrestrial	N	1	low	(https://prezi.com/ei6bid_axp6q/coast-horned-lizard-endangerment/) (https://prezi.com/ei6bid_axp6q/coast-horned-lizard-endangerment/)
Xenosaurus grandis	Xenosauridae	12.8	captive	22.9746	Diurnal	Terrestrial	N	2	low	(Jaime Zu Niga-Vega et al. 2015) Slavens and Slavens 1999
Ctenophorus fionni	Agamidae	10	captive	7.97992	Diurnal	Terrestrial	N	120	high	(Johnston, 1999) Brown 2012
Dipsosaurus dorsalis	Iguanidae	14.6	captive	71.4747	Diurnal	Terrestrial	N	550	high	(Jones & Lovich, 2009): 10; 6:("A ge entry for Dipsosaurus dorsalis", 2001; "Desert Igua - Rosamond Gifford Zoo", 2010) Carey and Judge 2000, De Magalhaes & Costa 2009, Slavens and Slavens 1999, Petzold 2008: 14 & 7 months
Darevskia derjugini	Lacertidae	8	wild	3.60888	Diurnal	Terrestrial	N	29	low	(Kidov et al. 2017); 7 yr max: (Kurnaz et al. 2018)
Phrynocephalus vlangalii	Agamidae	6	wild	5.42025	Diurnal	Terrestrial	N	44	acceptable	(Lu et al. 2017)
Uromastyx nigriventris	Agamidae	46	captive	336.058	Diurnal	Terrestrial	N	NA	Questionable	(Pauwels et al. 2017)
Acanthodactylus scutellatus	Lacertidae	9.3	captive	4.17522	Diurnal	Terrestrial	N	8	low	(Perry & Dmi'el, 1994) TAU museum records: 9 years and 3 months
Menetia greyii	Scincidae	1	wild	0.460288	Diurnal	Terrestrial	N	36	acceptable	(Pianka 2011)
Xantusia vigilis	Xantusiidae	10.9	captive	1.22855	Cathemeral	Terrestrial	N	55	acceptable	(Richard G. Zweifel & Charles H. Lowe, 1966) Carey and Judge 2000, De Magalhaes & Costa 2009: 10.9, Stebbins and McGinnis 2012: 10; Slavens and Slavens 1999: 10 and 11 months, Zuniga-Vega et al. 2005: 11.5 citing Zweifel and Lowe 1966, but Zweifel and Lowe 1966 doubt this record and give 8.5 for the maximum verified age
Podarcis lilfordi	Lacertidae	13.11	captive	5.80496	Diurnal	Terrestrial	Y	8	low	(Rotger et al. 2016) TAU museum records: 13 years and 11 months
Phrynosoma hernandesi	Phrynosomatidae	8.5	captive	14.6376	Diurnal	Terrestrial	N	40	acceptable	(Sherbrooke, Wade C, 2003) Montanucci 1983: "The mother (RRM 2350) of the captive-reared lizards was an apparently old adult when collected in 1977." - she dies 5.5 years later, assuming she was at least 3 when captured (douglassi, somewhat smaller, mature at 2 years) I write 8.5, "about 8 years" (Lemos-Espi l et al. 2013)
Phrynocephalus strauchi	Agamidae	2.5	wild	2.23915	Diurnal	Terrestrial	N	NA	Questionable	(Smirina and Ananjeva 2017)
Phrynocephalus versicolor	Agamidae	5	wild	2.88546	Diurnal	Terrestrial	N	NA	Questionable	(Smirina and Ananjeva 2017)
Micrablepharus atticolus	Gymnophthalmidae	1	wild	0.996201	Diurnal	Terrestrial	N	465	high	(Sousa et al. 2015)
Aspidoscelis rodecki	Teiidae	2	wild	6.92383	Diurnal	Terrestrial	N	70	acceptable	(Walker 2012)
Homonota horrida	Phyllodactylidae	5.6	captive	2.14337	Nocturnal	Terrestrial	N	NA	Questionable	(Werner et al. 1993)
Ctenophorus isolepis	Agamidae	2	wild	4.99735	Diurnal	Terrestrial	N	NA	Questionable	(Wilson 2012): 2
Phrynocephalus theobaldi	Agamidae	8	captive	2.88502	Diurnal	Terrestrial	N	340	high	(Yuanting JIN & Pinghu LIAO, 2015): sexually mature in 2 years so I write 7 Schleich and Kastle 2002
Lampropholis guichenoti	Scincidae	5	wild	0.934629	Diurnal	Terrestrial	N	NA	Questionable	>4 (Heatwole and Taylor 1987), so I write 5
Ctenotus taeniolatus	Scincidae	6	wild	5.64587	Diurnal	Terrestrial	N	NA	Questionable	>5 (Heatwole and Taylor 1987), so I write 5; 2 years after the 2 it takes to mature (Hutchinson 1993)
Liopholis modesta	Scincidae	5	wild	15.1203	Diurnal	Terrestrial	N	6	low	>5, Chapple 2003, Greer 2005
Acanthodactylus beershebensis	Lacertidae	4.6	captive	6.83136	Diurnal	Terrestrial	N	5	low	1 year:(Gregory J. Watkins-Colwell et al. 2010) Amitai and Bouskila 2001: 2, TAUM museum records: 4.57
Sceloporus bicanthalis	Phrynosomatidae	1.3	wild	4.12103	Diurnal	Terrestrial	N	715	high	1: Rodriguez-Romero et al. 2004, Rodriguez-Romero et al. 2011: 15 months
Paralaudakia caucasia	Agamidae	14	wild	48.0283	Diurnal	Terrestrial	N	3	low	10:(Erg?l et al. 2017), Baig et al. 2012, Smiri and A njeva 2007: 13, Cicek et al. 2012: 13; Kumas and Ayaz 2014: 13, Panov and Zykova 2016: 14
Varanus bengalensis	Varanidae	22	captive	2009.37	Diurnal	Terrestrial	N	55	acceptable	10-12:(https://www.saczoo.org/document.doc?id=361) Schleich and Kastle 2002: 22 (also Kastle et al. 2013), Carey and Judge 2000 say 10; Slavens and Slavens 1999: 11 and 2 months, Rogner 1997: 16-17, Erickson 2003: 10.5
Panaspis wahlbergi	Scincidae	1.2	wild	1.92802	Diurnal	Terrestrial	N	NA	Questionable	10-14 months (Branch 2014, Branch 2016)
Elgaria multicarinata	Anguidae	15	wild	23.6684	Cathemeral	Terrestrial	N	55	acceptable	10-15:(http://library.sandiegozoo.org/factsheets/alligator_lizard/alligatorlizard.htm) De Magalhaes & Costa 2009, Slavens and Slavens 1999 (9 years, 10 months)
Tupinambis teguixin	Teiidae	16.1	captive	1355.63	Diurnal	Terrestrial	N	550	high	10-15:(http://pioneerunion.ca.schoolwebpages.com/education/components/scrapbook/default.php?sectiondetailid=3319&linkid= v-menu-container-4-27728) Carey and Judge 2000, De Magalhaes & Costa 2009, Slavens and Slavens 1999: 16.1; Petzold 2008: 16.1
Ctenophorus mirrityana	Agamidae	11.5	captive	9.70897	Diurnal	Terrestrial	N	4	low	1-2:(McFadden and Purcell 2015) McFadden and Purcell 2015:11 years, 6 months, and 5 days.
Meroles squamulosus	Lacertidae	1.9	wild	5.05829	Diurnal	Terrestrial	N	NA	Questionable	12-13 months (Branch 2014), 12-14 months after breeding (Branch 2016): 23 months
Phrynosoma asio	Phrynosomatidae	13.8	captive	38.5093	Diurnal	Terrestrial	N	1	low	13 years, 8 months, 29 days over 12 years, 1 month, and 11 days (Pareja et al. 2016)
Lacerta agilis	Lacertidae	15	wild	10.6045	Diurnal	Terrestrial	N	8	low	15:(LJUNGSTROM et al 2016); Jesus 2012: 12; Olsson and Shine 1996: 12, Hallmann and Griebeler 2015: 11
Coleonyx reticulatus	Eublepharidae	15	wild	3.174	Nocturnal	Terrestrial	N	1	low	15-20:(https://prezi.com/comik27mmtjv/reticulated-gecko/) Slavens and Slavens 1999, Seufer et al. 2005: 8 and 11 months
Ctenophorus nuchalis	Agamidae	11	captive	16.4759	Diurnal	Terrestrial	N	NA	Questionable	2-3:(http://reptilepark.com.au/animals/reptiles/dragons/central-netted-dragon/) Brown 2012: 11
Agama aculeata	Agamidae	2.16667	wild	16.6615	Diurnal	Terrestrial	N	1	low	25-28:(http://www.kololo.co.za/en/index.php?option=com_content&view=article&id=1012:ground-agama&catid=332&Itemid=1702) Hughes 1988, Slavens and Slavens 1999
Alsophylax pipiens	Gekkonidae	3.5	wild	0.806828	Nocturnal	Terrestrial	N	NA	Questionable	3.5 inferred from Szczerbak and Golubev 1996
Ablepharus kitaibelii	Scincidae	4	wild	1.14843	Diurnal	Terrestrial	N	4	low	3.5 years (Foufopoulos and Ives 1999)
Uromastyx aegyptia	Agamidae	33	wild	828.048	Diurnal	Terrestrial	N	550	high	33: (Bringsoe 1998), Amitai and Bouskila 2001: 20, Werner 2016:20 (http://animals.mom.me/life-expectancy-egyptian-spiny-tailed-lizard-6652.html)
Oligosoma polychroma	Scincidae	6	captive	3.16119	Diurnal	Terrestrial	Y	1	low	3-4:(chapple, 2016) Slavens and Slavens 1999: 6, Cree and Hare 2016 (3-4 in ture, 6 in captivity)
Sceloporus cyanogenys	Phrynosomatidae	6.7	captive	40.2686	Diurnal	Terrestrial	N	1	low	3-4:(http://cincin tizoo.org/blog/animals/blue-spiny-lizard/) Carey and Judge 2000, Slavens and Slavens 1999
Aspidoscelis uniparens	Teiidae	4	wild	7.09727	Diurnal	Terrestrial	N	12	low	3-5:(http://squamatabiodiversity.weebly.com/desert-grassland-whiptail.html), Bateman et al. 2010: at least 4
Aspidoscelis tesselatus	Teiidae	5	wild	13.1024	Diurnal	Terrestrial	N	36	acceptable	4 or older Degenhardt et al. 1996
Coleonyx brevis	Eublepharidae	5	wild	1.09111	Nocturnal	Terrestrial	N	1	low	4-5:(Aguirre and Gatica 2010),(http://www.luckyreptile.com/tiere/150/en/pid1,467$pid2,59$pid3,259/animals.html):10 2.75: (Slavens and Slavens 1999)
Egernia hosmeri	Scincidae	26.5	captive	57.989	Diurnal	Terrestrial	N	550	high	5+ (Chapple, 2005):Life spans are generally long, known to exceed 5 years in all species studied Carey and Judge 2000 say 3.3, but as some only breed at 5 years of age, De Magalhaes & Costa 2009: 24.5, females at leat 12, a male 24.5 (Post 2000), Chapple 2003: 12-24; Slavens and Slavens 1999: 26 and 6 months, Greer 2005: 9, Brown 2012: 24.5
Pseudemoia entrecasteauxii	Scincidae	6	wild	2.18888	Diurnal	Terrestrial	N	NA	Questionable	5-6 years (Wikipedia)
Gambelia sila	Crotaphytidae	5	wild	30.0695	Diurnal	Terrestrial	N	1078	high	5-7:(https://prezi.com/xatkrwjum77w/lizard-blunt-nosed-leopard/); (Germano & Williams 2005: 4 years and 10 months)
Phrynosoma solare	Phrynosomatidae	8	captive	29.1599	Diurnal	Terrestrial	N	NA	Questionable	5-8:(http://kids. tio lgeographic.com/animals/regal-horned-lizard/#regal-horned-lizard-close.jpg) more than 8 (Degenhardt et al. 1996)
Phrynosoma mcallii	Phrynosomatidae	9	captive	11.4813	Diurnal	Terrestrial	N	NA	Questionable	6: (http://www.azgfd.gov/w_c/edits/documents/Phrymcal.d_004.pdf) 9: (http://www.azgfd.gov/w_c/edits/documents/Phrymcal.d_004.pdf)
Moloch horridus	Agamidae	20	wild	21.0713	Diurnal	Terrestrial	N	104	high	6-20: (Pianka and Pianka, 1970) Greer 2005: 12 years and 10 months as adult, so at least 13 and 10
Callisaurus draconoides	Phrynosomatidae	8	captive	13.0116	Diurnal	Terrestrial	N	NA	Questionable	71 months (Tanner and Krogh 1975) (Smith, 1946)
Liolaemus irregularis	Liolaemidae	10	wild	11.3047	Nocturnal	Terrestrial	N	31	acceptable	8 for females, 10 for males : (Cabezas-Cartes et al. 2015)
Uma inornata	Phrynosomatidae	5	wild	19.1435	Diurnal	Terrestrial	N	NA	Questionable	8: (XIONGWEN CHEN, 2006); (Barrows et al. 2010: few lived over 5 years)
Hemitheconyx caudicinctus	Eublepharidae	16.2	captive	8.58381	Nocturnal	Terrestrial	N	550	high	8-10:(http://warrensburg.k12.mo.us/animals/jackier1/) De Magalhaes & Costa 2009: 16.2, Werner et al. 1993: 8 years, 1 month; Slavens and Slavens 1999: 16 and 2 months; http://care-sheet.com/index/Hemitheconyx_caudicinctus: up to 15 years
Gambelia wislizenii	Crotaphytidae	9.8	wild	31.9779	Diurnal	Terrestrial	N	1	low	Aguirre and Gatica 2010: 8 years, Medica and Turner 1984: 118 months Slavens and Slavens 1999 give 1 year and 10 months - before maturity of some specimens,
Eutropis multifasciata	Scincidae	5	captive	18.7295	Diurnal	Terrestrial	N	1	low	Alcala 1966 (http://www.lesdragonsdasgard.com/t1553-golden-skink-care-sheet-by-anthony)
Papuascincus stanleyanus	Scincidae	6	wild	2.66944	Diurnal	Terrestrial	Y	628	high	Allison 1982
Eremias argus	Lacertidae	11	wild	4.28096	Diurnal	Terrestrial	N	117	high	Altunisik et al. 2013: 11 for females, 8 for males, Uzum et al. 2014 (max 11)
Chioninia coctei	Scincidae	16	wild	346.983	Cathemeral	Terrestrial	Y	27	low	Andreone and Guarino 2003; Jesus 2012: 16 Carey and Judge 2000 say 8.9
Cnemidophorus murinus	Teiidae	5	wild	31.125	Diurnal	Terrestrial	Y	5	low	animals captured as adults were recaptured 4.3 years later (Dearing & Schall 1994), so I write 5 Slavens and Slavens 1999:1.5
Darevskia rostombekowi	Lacertidae	6	wild	3.2251	Diurnal	Terrestrial	N	3	low	Arakelyan et al. 2011
Darevskia portschinskii	Lacertidae	6	wild	3.31838	Diurnal	Terrestrial	N	NA	Questionable	Arakelyan et al. 2011
Darevskia valentini	Lacertidae	9	wild	6.83288	Diurnal	Terrestrial	N	28	low	Arakelyan et al. 2011, Arakelyan 2002
Darevskia raddei	Lacertidae	6	wild	4.83125	Diurnal	Terrestrial	N	NA	Questionable	Arakelyan et al. 2011, Arakelyan 2002 ( irensis):6; Yakin and Tok 2015: 6
Darevskia unisexualis	Lacertidae	8	wild	4.89998	Diurnal	Terrestrial	N	112	high	Arakelyan et al. 2011, Arakelyan 2002: 7; Yakin and Tok 2015: 6, Arakelyan et al. 2013: 8
Darevskia dahli	Lacertidae	6	wild	4.5464	Diurnal	Terrestrial	N	NA	Questionable	Arakelyan et al. 2011: 6; Yakin and Tok 2015: 6
Darevskia armeniaca	Lacertidae	8	wild	3.73777	Diurnal	Terrestrial	N	76	acceptable	Arakelyan et al. 2011: 8; Yakin and Tok 2015: 7, Arakelyan et al. 2013: max 8
Darevskia sapphirina	Lacertidae	6	wild	4.159	Diurnal	Terrestrial	N	15	low	Arakelyan et al. 2013: 6
Darevskia uzzelli	Lacertidae	6	wild	5.15607	Diurnal	Terrestrial	N	52	acceptable	Arakelyan et al. 2013: 6
Podarcis erhardii	Lacertidae	5	wild	5.94783	Diurnal	Terrestrial	N	45	acceptable	around 5, Panyiotis Pafilis; Foufopoulos and Ives 1999: 5 years
Iberolacerta aurelioi	Lacertidae	17	wild	3.63982	Diurnal	Terrestrial	N	222	high	Arribas 2004: 17, Galan 2011: 14-16; Arribas 2014:16
Iberolacerta martinezricai	Lacertidae	8	captive	5.14966	Nocturnal	Terrestrial	N	535	high	Arribas 2014: 8 years
Sceloporus arenicolus	Phrynosomatidae	4	wild	6.23638	Diurnal	Terrestrial	N	NA	Questionable	at least 2 (Degenhardt et al. 1996), 3-4 years (Jones and Lovich 2009)
Aspidoscelis neomexicanus	Teiidae	4	wild	8.75255	Diurnal	Terrestrial	N	61	acceptable	Bateman et al. 2010: at least 4 Carey and Judge 2000, Slavens and Slavens 1999: 3 and 2 months
Aspidoscelis exsanguis	Teiidae	5	wild	15.195	Diurnal	Terrestrial	N	56	acceptable	Bateman et al. 2010: at least 4, Cordes and Walker 2016 :5-6
Psammodromus hispanicus	Lacertidae	0.916667	captive	2.42664	Diurnal	Terrestrial	N	NA	Questionable	Bauwens and Diaz-Uriarte 1997: 11 months, Careterro 2006: within less than 1 year Reptiles & Amphibians of France: (The average life span for Psammodromus hispanicus is only 2 to 3 years)
Podarcis bocagei	Lacertidae	7	wild	3.81314	Diurnal	Terrestrial	N	44	acceptable	Bauwens and Diaz-Uriarte 1997: 28 months, Galan 2008: 4, Galan 1999: estimated 7 years (Fig. 3), and 6 years known from skeletochronological methods (quoting Vicente, 1989)
Lacerta schreiberi	Lacertidae	10	wild	25.8082	Diurnal	Terrestrial	N	213	high	Bauwens and Diaz-Uriarte 1997: 44 months, Luis et al. 2004: 8 (but reports a literature record of 10)
Scincella lateralis	Scincidae	4	wild	1.41832	Diurnal	Terrestrial	N	1	low	Beane et al. 2010: 4 Slavens and Slavens 1999: 2.5
Heloderma suspectum	Helodermatidae	48	captive	568.151	Cathemeral	Terrestrial	N	1000	high	Beck 2005: 19 (p 113) Carey and Judge 2000, De Magalhaes & Costa 2009, Stebbins and McGinnis 2012, see Bogert and Martin del Campo 1956, Beck 2005: 30, TAUZ: an individual arrived as adult in 1974 or earlier (Arieh Landsman pers. Com.); Petzold 2008: 25
Nucras lalandii	Lacertidae	6.7	captive	14.0702	Diurnal	Terrestrial	N	1	low	Bogin et al. 1999: 6 years, 8 months
Phymaturus punae	Liolaemidae	20	wild	24.4822	Nocturnal	Terrestrial	N	21	low	Boretto et al. 2015: to 18 in females and to 20 in males
Phrynocephalus mystaceus	Agamidae	6	wild	8.6048	Diurnal	Terrestrial	N	NA	Questionable	Brushko 1979: 46 months in ture; Szczerbak 2003: 6 years
Darevskia parvula	Lacertidae	8	wild	3.44421	Diurnal	Terrestrial	N	92	acceptable	Bulbul et al. 2016
Darevskia clarkorum	Lacertidae	12	wild	5.02229	Diurnal	Terrestrial	N	89	acceptable	Bulbul et al. 2016
Liolaemus multicolor	Liolaemidae	20	wild	12.7549	Nocturnal	Terrestrial	N	NA	Questionable	Cabezas-Cartes et al. 2015: 20
Conolophus pallidus	Iguanidae	60	wild	1590.77	Diurnal	Terrestrial	Y	55	acceptable	can live for 60 years" (Charles Darwin Research Station Fact Sheet; (http://web.archive.org/web/20070606214921/http://www.darwinfoundation.org/files/species/pdf/land-igua -en.pdf) Carey and Judge 2000, De Magalhaes & Costa 2009: 17.1;
Conolophus subcristatus	Iguanidae	60	wild	2481.76	Diurnal	Terrestrial	Y	NA	Questionable	can live for 60 years" (Charles Darwin Research Station Fact Sheet; (http://web.archive.org/web/20070606214921/http://www.darwinfoundation.org/files/species/pdf/land-igua -en.pdf), Petzold 2008: 15 Carey and Judge 2000, De Magalhaes & Costa 2009: 15; Co nt and Hudson 1949: 15 and one month;
Matobosaurus validus	Gerrhosauridae	17.2	captive	301.595	Diurnal	Terrestrial	N	550	high	Carey and Judge 2000, De Magalhaes & Costa 2009 17:2, Slavens and Slavens 1999
Aspidoscelis scalaris	Teiidae	3	wild	13.9973	Diurnal	Terrestrial	N	NA	Questionable	Castanet 1994
Mesalina olivieri	Lacertidae	5	wild	1.65351	Diurnal	Terrestrial	N	2	low	Castanet 1994 (5), at least 2 (Amitai and Bouskila 2001)
Psammophilus dorsalis	Agamidae	4	wild	15.1622	Diurnal	Terrestrial	N	1	low	Castanet 1994, Cicek et al. 2012: 4, (Mahapatro N.N et al. 1989):3.4
Loxopholis guianense	Gymnophthalmidae	2	wild	0.752604	Diurnal	Terrestrial	N	NA	Questionable	Castanet 1994: 2 years, Avila-Pires 1995: 18-20 months
Acanthodactylus pardalis	Lacertidae	4	wild	5.11198	Diurnal	Terrestrial	N	1	low	Castanet 1994: 4 Slavens and Slavens 1999: 1.5, Carey and Judge 2000
Gallotia bravoana	Lacertidae	6	wild	44.2369	Diurnal	Terrestrial	Y	36	acceptable	Castanet and Baez 1991 (G. gomera ): 6
Phrynocephalus persicus	Agamidae	5	wild	1.937	Diurnal	Terrestrial	N	27	low	Cicek et al. 2012 (Phrynocephalus horvathi): 5
Acanthodactylus dumerilii	Lacertidae	1.5	wild	3.53474	Diurnal	Terrestrial	N	100	high	Cisse et al. 1977
Oligosoma maccanni	Scincidae	8	wild	3.15281	Diurnal	Terrestrial	Y	NA	Questionable	Cree and Hare 2016
Oligosoma otagense	Scincidae	44	captive	25.803	Diurnal	Terrestrial	Y	55	acceptable	Cree and Hare 2016: 21 De Magalhaes & Costa 2009, Cree 1994 18.5; Slavens and Slavens 1999: 44, Cree and Hare 2016: 44
Oligosoma grande	Scincidae	30	captive	12.7659	Diurnal	Terrestrial	Y	55	acceptable	Cree and Hare 2016: 23, (Reardon et al 2006):13-18; "Grand skinks can live 13-18 years in the wild (Reardon et al 2006, Tocher unpub. data 2006) Cree 1994: at least 5; Slavens and Slavens 1999: 11; and 30+ years (Tocher & Kean 2003).", Cree and Hare 2016: 30
Aspidoscelis tigris	Teiidae	8	wild	14.846	Diurnal	Terrestrial	N	550	high	De Magalhaes & Costa 2009: 7.8, Degenhardt et al. 1996: 8; Medica and Turner 1984: 94 months, Paulissen 2000: 7 Slavens and Slavens 1999: 1 and 11 months - before maturity in some populations,
Sceloporus scalaris	Phrynosomatidae	5	wild	5.20058	Diurnal	Terrestrial	N	NA	Questionable	Degenhardt et al. 1996: 5, but only 6.3% lived > 2 years; Ballinger and Congdon 1981: 5
Crotaphytus collaris	Crotaphytidae	10	captive	25.2826	Diurnal	Terrestrial	N	NA	Questionable	Degenhardt et al. 1996: 10 (http://switchzoo.com/profiles/collaredlizard.htm)
Holbrookia maculata	Phrynosomatidae	5	wild	6.12988	Diurnal	Terrestrial	N	NA	Questionable	Degenhardt et al. 1996: 5, Gutierrez et al. 2013: 4
Cophosaurus texanus	Phrynosomatidae	6	wild	9.14996	Diurnal	Terrestrial	N	NA	Questionable	Degenhardt et al. 1996: 6, Lemos-Espi l and Dixon 2013: 5
Sceloporus merriami	Phrynosomatidae	6	wild	4.62718	Diurnal	Terrestrial	N	132	high	Dunham 1981 (and interpretation in Huey & Dunham 1987): 6 years
Petrosaurus thalassinus	Phrynosomatidae	20	wild	32.9153	Diurnal	Terrestrial	N	3	low	EOL, Wikipedia: 20 years Slavens and Slavens 1999: 4.9
Stellagama stellio	Agamidae	10.4	captive	33.7015	Diurnal	Terrestrial	N	63	acceptable	Ergul et al. 2014 (also Panov and Zykova 2016): to 10 years. TAUM museum records: 10.36
Xantusia riversiana	Xantusiidae	32.9	wild	10.791	Diurnal	Terrestrial	Y	55	acceptable	Fellers et al. 1998: 11.3 known, calculated 32.9; Jones and Lovich 2009: 12 or more Carey and Judge 2000, De Magalhaes & Costa 2009, Slavens and Slavens 1999:13 and 11 months;
Iberolacerta monticola	Lacertidae	15	wild	6.92666	Diurnal	Terrestrial	N	1	low	Galan 2011: 15, Galan 2008: 8, Arribas 2004: 11; Arribas 2014: 10
Rhynchoedura ornata	Diplodactylidae	2.8	wild	2.30337	Nocturnal	Terrestrial	N	1235	high	Greer 2005: (2.78 years) (Read 1999). Read 1999: few live more than 2 years
Diplodactylus conspicillatus	Diplodactylidae	3.2	wild	3.24716	Nocturnal	Terrestrial	N	851	high	Greer 2005: 3.15 years , Read 1999: 3 years
Ctenotus leonhardii	Scincidae	7	wild	5.53287	Diurnal	Terrestrial	N	46	acceptable	Greer 2005: at least 7, Read 1998: 7
Lucasium stenodactylum	Diplodactylidae	6	wild	2.88714	Nocturnal	Terrestrial	N	871	high	Greer 2005: In the field, the species can live as long as 1488 days (4.07 years) (Read 1999), Read 1999: at least 6
Anguis veronensis	Anguidae	9	wild	35.5575	Diurnal	Terrestrial	N	8	low	Guarino et al. 2016
Darevskia rudis	Lacertidae	8	wild	7.60047	Diurnal	Terrestrial	N	62	acceptable	Gul et al. 2014: 8
Darevskia bithynica	Lacertidae	6	wild	5.60357	Diurnal	Terrestrial	N	74	acceptable	Gul et al. 2015 (6)
Phymaturus tenebrosus	Liolaemidae	16	wild	25.0666	Diurnal	Terrestrial	N	NA	Questionable	Gutierrez et al. 2013 (16), 16 (Boretto et al. 2015, Cabezas-Cartes et al. 2015)
Liolaemus quilmes	Liolaemidae	7	wild	4.66992	Diurnal	Terrestrial	N	55	acceptable	Halloy 2006: 7
Ctenophorus ornatus	Agamidae	11	wild	12.2512	Diurnal	Terrestrial	N	NA	Questionable	Heatwole and Taylor 1987
Ctenophorus fordi	Agamidae	2	wild	2.74728	Diurnal	Terrestrial	N	NA	Questionable	Heatwole and Taylor 1987, Swan and Watharow 2005: 1.6, Wilson 2012:2
Ctenophorus maculosus	Agamidae	3.5	wild	5.40402	Diurnal	Terrestrial	N	7	low	Heatwole and Taylor 1987: 3-5
Eutropis longicaudata	Scincidae	4.5	wild	23.623	Diurnal	Terrestrial	N	85	acceptable	Huang 2007: 4 ( ture, for adults, so I list 4.5) (Slavens and Slavens 1999)
Cyclura cychlura	Iguanidae	40	wild	1518.24	Diurnal	Terrestrial	Y	55	acceptable	Iverson et al. 2004: at least 40, Henderson & Powell 2009: 36.7
Scelarcis perspicillata	Lacertidae	5	wild	3.2251	Diurnal	Terrestrial	N	NA	Questionable	Jesus 2012
Teira dugesii	Lacertidae	16	wild	6.69867	Diurnal	Terrestrial	Y	55	acceptable	Jesus 2012 (16) Carey and Judge 2000, De Magalhaes & Costa 2009 (4.8)
Gallotia simonyi	Lacertidae	45	wild	201.563	Diurnal	Terrestrial	Y	55	acceptable	Jesus 2012: 20, Rodriguez-Dominguez and Moli -Borja 1998: 17, Castanet and Baez 1991: 20 (Gallotia goliath), Moli -Borja and Rodriguez-Dominguez 2004: 133 months, Hallmann & Griebeler 2015 (5.4 years) Carey and Judge 2000, De Magalhaes & Costa 2009: 5.4
Homonota darwinii	Phyllodactylidae	17	wild	1.35002	Nocturnal	Terrestrial	N	36	acceptable	Kubisch et al. 2012, Gutierrez et al. 2013: 9; Piantoni et al. 2006: 17, see also Cicek et al. 2015, Kalayci et al. 2015
Ophisops elegans	Lacertidae	7	wild	2.55792	Diurnal	Terrestrial	N	3	low	Kumas and Ayaz 2014: 7, Foufopoulos and Ives 1999: 6 years Carey and Judge 2000, De Magalhaes & Costa 2009, Slavens and Slavens 1999: 6
Sphaerodactylus nicholsi	Sphaerodactylidae	4	captive	0.392538	Diurnal	Terrestrial	Y	32	acceptable	Leclair et al. 2011
Sphaerodactylus nigropunctatus	Sphaerodactylidae	4	captive	1.58532	Diurnal	Terrestrial	Y	NA	Questionable	Leclair et al. 2011
Teratoscincus roborowskii	Sphaerodactylidae	6	captive	11.584	Nocturnal	Terrestrial	N	54	acceptable	Li et al. 2010 (http://www.reptile-care.de/species/Gekkota/Sphaerodactylidae/Teratoscincus-roborowskii.html)
Panaspis nimbaensis	Scincidae	2	captive	1.53667	Diurnal	Terrestrial	N	NA	Questionable	male: 0.9, female: 1.3(http://megaslides.com/doc/9457627/07chapter6-2) 7.1 months on average in the field, slightly longer than 18 months in captivity (Barbault 1974)
Carlia storri	Scincidae	3.3	wild	1.2388	Diurnal	Terrestrial	N	438	high	Manicom 2010: 2.8 years as adults, at least 6 extra months to become adult
Carlia rubrigularis	Scincidae	3.6	wild	2.43031	Diurnal	Terrestrial	N	548	high	Manicom 2010: 3.1 years as adults, at least 6 extra months to become adult
Carlia rostralis	Scincidae	3.8	wild	3.22195	Diurnal	Terrestrial	N	820	high	Manicom 2010: 3.3 years as adults, at least 6 extra months to become adult
Gallotia intermedia	Lacertidae	10.4	wild	64.1148	Diurnal	Terrestrial	Y	NA	Questionable	Moli -Borja and Rodriguez-Dominguez 2004: 125 months
Oligosoma chloronoton	Scincidae	8	wild	21.485	Diurnal	Terrestrial	Y	NA	Questionable	Mules 2012
Oligosoma lineoocellatum	Scincidae	14	wild	9.11593	Diurnal	Terrestrial	Y	6	low	Mules 2012: 8-14, Hoare et al. 2005: at least 8 but less than 14
Sphaerodactylus townsendi	Sphaerodactylidae	1.58	captive	0.674606	Diurnal	Terrestrial	Y	16	low	NA
Xantusia arizonae	Xantusiidae	10	wild	2.88133	Diurnal	Terrestrial	N	NA	Questionable	over 10 years (Jones and Lovich 2009)
Aspidoscelis laredoensis	Teiidae	3	wild	11.0957	Diurnal	Terrestrial	N	707	high	Paulissen 2000 (3: few were caught as adults for 3 successive years. They mature in just under 1 so 3 at least)
Ctenotus lancelini	Scincidae	6	wild	4.03872	Diurnal	Terrestrial	N	6	low	Pearson & Jones 2000
Sceloporus jarrovii	Phrynosomatidae	3.8	wild	15.3772	Diurnal	Terrestrial	N	91	acceptable	Pianka and Parker 1975: 2.8, Gadsden and Estrada-Rodriguez 2008: minimum 3.8 years Slavens and Slavens 1999: 2.5
Aspidoscelis deppii	Teiidae	2	wild	11.6496	Diurnal	Terrestrial	N	87	acceptable	rarely survive more than 2 (Savage 2002)
Ctenotus regius	Scincidae	4	wild	3.67299	Diurnal	Terrestrial	N	76	acceptable	Read 1998, and Greer 2005: at least 4
Ctenotus strauchii	Scincidae	2.5	wild	1.916	Diurnal	Terrestrial	N	7	low	Read 1998: at least 2.5
Ctenotus schomburgkii	Scincidae	5	wild	1.22211	Diurnal	Terrestrial	N	120	high	Read 1998: at least 5, Greer 2005: at least five years old
Uta stansburiana	Phrynosomatidae	4.8	wild	3.95331	Diurnal	Terrestrial	N	1	low	Rogner 1997: rarely more than 1 in the field, Medica and Turner 1984: 58 months Slavens and Slavens 1999
Phrynocephalus guttatus	Agamidae	5	wild	2.5793	Diurnal	Terrestrial	N	108	high	Rogovin & Semenov 2002: 4 years, A njeva et al. 2003 gives 5 for melanurus
Lacerta strigata	Lacertidae	7	wild	23.1302	Diurnal	Terrestrial	N	1	low	Roitberg and Smiri 2006 (4 years), Hallmann and Griebeler 2015: 7 years
Elgaria coerulea	Anguidae	8	captive	13.5885	Diurnal	Terrestrial	N	334	high	Rutherford 2004: 8, Stewart 1985 10:(http://www.lizardtypes.com/northern-alligator-lizard/); 5-8:(http://www.reptilesmagazine.com/Lizard-Species/Northern-Alligator-Lizard/)
Varanus komodoensis	Varanidae	62	wild	47274.1	Diurnal	Terrestrial	Y	550	high	Sastrawan and Ciofi 2002: 50, Auffenberg 1981: 50, Laver et al. 2012: 62; Petzold 2008: 17, Purwanda et al. 2015: 60 years Carey and Judge 2000, De Magalhaes & Costa 2009: 25; Slavens and Slavens 1999: 12 and 4 months,
Heteronotia binoei	Gekkonidae	13.6	captive	2.18062	Nocturnal	Terrestrial	N	55	acceptable	sexually mature at three years, so I write 7.25(Balshaw, 2000) De Magalhaes & Costa 2009: 13.6, Werner et al. 1993: 7.5; Slavens and Slavens 1999: 13 and 7 months, Brown 2012: 9, Porter 2008: >12
Pristidactylus achalensis	Leiosauridae	11	wild	29.8783	Diurnal	Terrestrial	N	155	high	Sinsch et al. 2002
Paralaudakia stoliczkana	Agamidae	10	wild	49.5413	Diurnal	Terrestrial	N	NA	Questionable	Smiri and Anjeva 2007: 10, Cicek et al. 2012: 10; Kumas and Ayaz 2014: 10
Ctenotus atlas	Scincidae	4	wild	5.28695	Diurnal	Terrestrial	N	NA	Questionable	Smith et al. 2013: 4
Nephrurus stellatus	Carphodactylidae	8	wild	2.59595	Nocturnal	Terrestrial	N	NA	Questionable	Smith et al. 2013: 8 (p14)
Cyclodomorphus casuarinae	Scincidae	5.3	captive	26.8609	Cathemeral	Terrestrial	N	NA	Questionable	Snider and Bowler 1992, Carey and Judge 2000
Plestiodon skiltonianus	Scincidae	8	wild	4.97577	Diurnal	Terrestrial	N	1	low	Stebbins and McGinnis 2012: 8 Slavens and Slavens 1999: 6 and 5 months
Phrynosoma platyrhinos	Phrynosomatidae	8	wild	16.5792	Diurnal	Terrestrial	N	3	low	Stebbins and McGinnis 2012: 8; Medica and Turner 1984: 82 months
Cyrtopodion scabrum	Gekkonidae	4	captive	2.00177	Nocturnal	Terrestrial	N	1	low	study was for 2 years tracking indivduals (ADEL A. IBRAHIM, 2013) Amitai and Bouskila 2001: 4, Werner et al. 1993: 3 years, 10 months; Slavens and Slavens 1999: 3 years, 10 months, see Hughes 1988, (http://www.luckyreptile.com/tiere/150/en/pid1,467$pid2,59$pid3,587/animals.html)
Phrynocephalus helioscopus	Agamidae	3	wild	3.34734	Nocturnal	Terrestrial	N	27	low	Szczerbak 2003 (3 in ture), 2.5 (Hallmann and Griebeler 2015)
Pachydactylus wahlbergii	Gekkonidae	5.5	captive	3.28132	Nocturnal	Terrestrial	N	3	low	TAUM: 5.5
Delma impar	Pygopodidae	20	wild	4.36784	Diurnal	Terrestrial	N	156	high	The life span of the Striped Legless Lizard is estimated to be at least 10 years (Smith & Robertson 1999) Greer 2005: "In captivity, the species has lived as long as eight years and eight months (Banks et al., 1999)."
Dinarolacerta mosorensis	Lacertidae	9	wild	6.0453	Diurnal	Terrestrial	N	56	acceptable	Tomasevic-Kolarov et al. 2010
Oligosoma suteri	Scincidae	12	wild	11.1425	Nocturnal	Terrestrial	Y	30	acceptable	Towns & Ferreira 2001: more than 12years, Cree and Hare 2016: 12 years
Oligosoma alani	Scincidae	20	wild	36.1953	Nocturnal	Terrestrial	Y	NA	Questionable	Towns 1994: estimated 20, Towns and Ferreira 2001: at least 11, Cree and Hare 2016: 11
Oligosoma whitakeri	Scincidae	45	captive	12.7873	Nocturnal	Terrestrial	Y	1	low	Towns and Ferreira 2001:16, Cree and Hare 2016: 18 Towns 1994: estimated 20, 12 as adults, modeled at 29, Slavens and Slavens 1999: 20, Cree and Hare 2016: 45
Darevskia brauneri	Lacertidae	13	wild	5.50825	Diurnal	Terrestrial	N	20	low	Tsellarius and Tsellarius 2009: 13
Eremias suphani	Lacertidae	10	wild	5.02849	Diurnal	Terrestrial	N	24	low	Uzum et al. 2014 (max 10)
Acanthodactylus boskianus	Lacertidae	9	wild	6.12097	Diurnal	Terrestrial	N	28	low	Uzum et al. 2014: 6 to 9 years in males and from 5 to 7 years in females TAU museum records: 8 years & 5 months,
Carinascincus ocellatus	Scincidae	12	wild	4.52972	Diurnal	Terrestrial	Y	472	high	Wapstra et al. 2001: 8-12 depending on temp of site
Paroedura picta	Gekkonidae	15	captive	8.98041	Nocturnal	Terrestrial	Y	1	low	Werner et al. 1993: 5; (http://www.jabberwockreptiles.com/pictus-gecko-care):10 (http://www.geckosunlimited.com/community/gecko-care-sheets/57079-paroedura-picta-geckos.html)
Anatololacerta anatolica	Lacertidae	10	wild	5.18879	Diurnal	Terrestrial	N	43	acceptable	Yakin and Tok 2015: 10 (also cited in Kumas and Ayaz 2014)
Parvilacerta parva	Lacertidae	8	wild	3.17775	Diurnal	Terrestrial	N	3	low	Yakin et al. 2012: 8
Varanus caudolineatus	Varanidae	12	captive	13.4729	Diurnal	Variable	N	NA	Questionable	("http://www.breeders-expo.de/species/Varanidae/Varanus-caudolineatus.html"):15
Calotes versicolor	Agamidae	5	captive	19.1717	Diurnal	Variable	N	10	low	(http://www.luckyreptile.com/tiere/150/en/pid1,467$pid2,56$pid3,109/animals.html):10, (De Magalhaes & Costa 2009):5
Cyrtodactylus pulchellus	Gekkonidae	4.75	captive	12.5126	Nocturnal	Variable	N	NA	Questionable	(http://www.luckyreptile.com/tiere/150/en/pid1,467$pid2,59$pid3,126/animals.html): 5; Slavens and Slavens 1999: 4.9
Varanus rudicollis	Varanidae	18.8	captive	744.231	Diurnal	Variable	N	65	acceptable	(Mendyk, 2015)
Uranoscodon superciliosus	Tropiduridae	4.83333	captive	40.1212	Diurnal	Variable	N	2	low	>7:(http://www.luckyreptile.com/tiere/150/en/pid1,467$pid2,64$pid3,132/animals.html); 4.1:(Slavens and Slavens 1999)
Cyrtodactylus mcdonaldi	Gekkonidae	10	captive	13.8628	Nocturnal	Variable	N	NA	Questionable	10: (Brown 2012)
Plica plica	Tropiduridae	5.2	captive	50.5477	Diurnal	Variable	N	1	low	10:(http://www.luckyreptile.com/tiere/150/en/pid1,467$pid2,64$pid3,130/animals.html); 5.2:(Slavens and Slavens 1999)
Lepidodactylus lugubris	Gekkonidae	15	captive	1.28716	Nocturnal	Variable	N	NA	Questionable	10-15:(https://www.joshsfrogs.com/mourning-gecko-lepidodactylus-lugubris.html), 12.6:(http://www.geckosunlimited.com/community/gecko-care-sheets/17763-mourning-gecko-lepidodactylus-lugubris-care-sheet.html), Greer 1989: 2.75
Varanus tristis	Varanidae	12	captive	230.983	Diurnal	Variable	N	1	low	12:(Brown, Danny, 2012), Carey and Judge 2000, Slavens and Slavens 1999: 8 and 3 months
Lacerta media	Lacertidae	15	captive	35.2673	Diurnal	Variable	N	17	low	15:(http://www.dragonfarm.co.uk/); TAUM museum records: 10.58
Varanus olivaceus	Varanidae	17.6	captive	4313.89	Diurnal	Variable	Y	55	acceptable	17.6:(Mendyk, 2015); De Magalhaes & Costa 2009, Slavens and Slavens 1999: 15 and 2 months
Egernia depressa	Scincidae	20	captive	18.7779	Diurnal	Variable	N	1	low	20:(http://www.reptile-care.de/species/Scincoidea/Scincidae/Egernia-depressa.html), 3.11:(Slavens and Slavens 1999)
Takydromus sexlineatus	Lacertidae	5	captive	3.41822	Diurnal	Variable	N	1	low	5:(http://grizzlyrun.com/Pets/Reptiles/Lizards/Long-Tailed_Grass/Default.htm), 1.5:(Slavens and Slavens 1999)
Acanthosaura crucigera	Agamidae	8	captive	61.2721	Diurnal	Variable	N	1	low	5-10:(http://reptile-parrots.com/forums/showthread.php/11072-Mountain-Horn-Dragon-Care), 2.6: (Slavens and Slavens 1999)
Chamaeleo dilepis	Chamaeleonidae	4	captive	59.7495	Diurnal	Variable	N	55	acceptable	5-8:(http://www.lizardtypes.com/flap-necked-chameleon/); 4:(De Magalhaes & Costa 2009, Slavens and Slavens 1999: 4);1-3.5:(https://books.google.co.il/books?id=Y8w0gEPC00AC&pg=PA137&lpg=PA137&dq=Chamaeleo+dilepis+lifespan+in+the+wild&source=bl&ots=zXL7JF2YG2&sig=ffY9sSsu1PQkEbDUlHsGBaY_ALs&hl=en&sa=X&ved=0ahUKEwjG_8qS1uvQAhWH0RQKHXALCBIQ6AEIUTAJ#v=onepage&q=Chamaeleo%20dilepis%20lifespan%20in%20th…
Agama lionotus	Agamidae	4	captive	20.6791	Diurnal	Variable	N	53	acceptable	6-10:(http://www.luckyreptile.com/tiere/150/en/pid1,467$pid2,56$pid3,594/animals.html); TAUM museum records: 4
Varanus gilleni	Varanidae	15	captive	29.5758	Diurnal	Variable	N	1	low	8:(http://www.reptiletalk.net/pygmy-mulga-monitor/); (Slavens and Slavens 1999: 5, Greer 1989: 4.5)
Trachylepis maculilabris	Scincidae	2.5	captive	7.02892	Diurnal	Variable	N	NA	Questionable	9.2 months on average in the field, "it is not rare to keep a M. maculilabris in captivity for more than two years" (Barbault 1976, p487), so I write 2.5
Omanosaura jayakari	Lacertidae	17	captive	70.0926	Diurnal	Variable	N	1	low	A specimen brought to TAU zoo, probably in 1997 (certainly not after 2001) as adult still lives (January 2014)
Anolis cristatellus	Dactyloidae	7	captive	5.1596	Diurnal	Variable	Y	NA	Questionable	Andrew Durso in "Anole An ls" (http://www.anolean ls.org/2013/06/27/fill-in-the-blank-obscure-anole-life-history-traits/): 83 months
Egernia striolata	Scincidae	15	captive	21.1838	Diurnal	Variable	N	1	low	Carey and Judge 2000 say 3.3, early after sexual maturity…; Slavens and Slavens 1999: 14 and 7 months, Brown 2012: 15
Ctenosaura similis	Iguanidae	22.5	captive	1717.95	Diurnal	Variable	N	55	acceptable	Carey and Judge 2000, De Magalhaes & Costa 2009, Slavens and Slavens 1999
Dactylocnemis pacificus	Diplodactylidae	13	captive	11.7753	Nocturnal	Variable	Y	55	acceptable	Carey and Judge 2000, De Magalhaes & Costa 2009, Slavens and Slavens 1999: 13, Werner et al. 1993: 11.5, A stasiadis and Whitaker 1987: 3
Varanus timorensis	Varanidae	14.9	captive	156.514	Diurnal	Variable	Y	55	acceptable	Carey and Judge 2000, De Magalhaes & Costa 2009, Slavens and Slavens 1999: 14 and 11 months
Ctenosaura pectinata	Iguanidae	16	captive	1095.68	Diurnal	Variable	N	55	acceptable	Carey and Judge 2000, De Magalhaes & Costa 2009, Slavens and Slavens 1999: 8.2, Petzold 2008: 16+
Gonatodes albogularis	Sphaerodactylidae	13	captive	1.50294	Diurnal	Variable	N	55	acceptable	Carey and Judge 2000, De Magalhaes & Costa 2009: 13; Slavens and Slavens 1999: 5 years, 7 months; Bauer 2013: 13
Iguana delicatissima	Iguanidae	20	captive	2624.74	Diurnal	Variable	Y	1	low	Carey and Judge 2000, Slavens and Slavens 1999: 4.4 (captivity, see also Henderson & Powell 2009); 20 (Henderson & Powell 2009)
Nebulifera robusta	Diplodactylidae	8.1	captive	10.1887	Nocturnal	Variable	N	1	low	Carey and Judge 2000, Slavens and Slavens 1999: 8.1
Anolis lineatopus	Dactyloidae	1	captive	3.55494	Diurnal	Variable	Y	1	low	Carey and Judge 2000, Snider and Bowler 1992
Tropiocolotes steudneri	Gekkonidae	3.4	captive	0.382697	Nocturnal	Variable	N	10	low	Carey and Judge 2000: 1.8, Werner et al. 1993: 3 years, 4 months; Slavens and Slavens 1999: 1 year, 10 months (also from Loveridge 1947, origin: Flower), (http://www.luckyreptile.com/tiere/150/en/pid1,467$pid2,59$pid3,673/animals.html):7
Phyllodactylus reissii	Phyllodactylidae	6.4	captive	5.89082	Nocturnal	Variable	N	3	low	de Espinoza et al. 1990: 5; Werner et al. 1993: 6 years, 5 months; Slavens and Slavens 1999: 4 and 5 months
Sceloporus serrifer	Phrynosomatidae	6.7	captive	27.8347	Diurnal	Variable	N	1000	high	De Magalhaes & Costa 2009
Laemanctus longipes	Corytophanidae	15.4	captive	77.3844	Diurnal	Variable	N	55	acceptable	De Magalhaes & Costa 2009, Slavens and Slavens 1999
Sauromalus hispidus	Iguanidae	17.2	captive	847.253	Diurnal	Variable	Y	55	acceptable	De Magalhaes & Costa 2009, Slavens and Slavens 1999
Anolis roquet	Dactyloidae	6.8	captive	6.39162	Diurnal	Variable	N	550	high	De Magalhaes & Costa 2009, Slavens and Slavens 1999, Henderson and Powell 2009: 6 and 8 months
Cyclura nubila	Iguanidae	47.6	captive	2302.91	Diurnal	Variable	Y	550	high	De Magalhaes & Costa 2009, Slavens and Slavens 1999: 47.6; Henderson & Powell 2009 (lewisi): 54, estimated 69
Christinus marmoratus	Gekkonidae	12.8	captive	3.72384	Nocturnal	Variable	N	55	acceptable	De Magalhaes & Costa 2009: 12.8; Slavens and Slavens 1999: 12 and 9 months, Brown 2012: 13
Egernia saxatilis	Scincidae	8	captive	23.0345	Diurnal	Variable	N	5	low	Greer 2005: at least 8
Strophurus ciliaris	Diplodactylidae	7	captive	7.62007	Nocturnal	Variable	N	NA	Questionable	Greer 2005:7(Husband, 1998).", (http://www.reptiletalk.net/spiny-tailed-gecko/):8, (http://www.petmagic.com.au/reptiles-and-amphibians/category-2/northern-spiny-tailed-gecko):10
Pseudothecadactylus lindneri	Diplodactylidae	18	captive	19.0351	Nocturnal	Variable	N	NA	Questionable	Henkel and Schmidt 1995: 12; more than 17 (Brown 2012)
Chondrodactylus bibronii	Gekkonidae	6.1	captive	10.4803	Nocturnal	Variable	N	3	low	Hughes 1988, Werner et al. 1993: 5.4, Slavens and Slavens 1999: 6 and a months
Rieppeleon kerstenii	Chamaeleonidae	3.5	captive	5.19051	Diurnal	Variable	N	NA	Questionable	Necas 1999: 3.5; LeBerre 2009: 2
Oligosoma inconspicuum	Scincidae	10	captive	3.58106	Diurnal	Variable	Y	1	low	Slavens and Slavens 1999
Oligosoma moco	Scincidae	3	captive	3.87117	Diurnal	Variable	Y	1	low	Slavens and Slavens 1999
Algyroides nigropunctatus	Lacertidae	2.3	captive	4.81829	Diurnal	Variable	N	1	low	Slavens and Slavens 1999
Plestiodon inexpectatus	Scincidae	2.3	captive	6.43442	Diurnal	Variable	N	1	low	Slavens and Slavens 1999
Cordylus jonesii	Cordylidae	10	captive	7.4798	Diurnal	Variable	N	1	low	Slavens and Slavens 1999
Sceloporus utiformis	Phrynosomatidae	3.4	captive	8.86402	Diurnal	Variable	N	1	low	Slavens and Slavens 1999
Trachylepis sechellensis	Scincidae	3.2	captive	9.36533	Diurnal	Variable	Y	1	low	Slavens and Slavens 1999
Pogona minor	Agamidae	6	captive	30.9231	Diurnal	Variable	N	1	low	Slavens and Slavens 1999
Varanus kordensis	Varanidae	14.3	captive	257.42	Diurnal	Variable	Y	3	low	Slavens and Slavens 1999
Pristurus rupestris	Sphaerodactylidae	4.9	captive	0.516361	Diurnal	Variable	N	1	low	Slavens and Slavens 1999
Lepidophyma tuxtlae	Xantusiidae	4.4	captive	5.24249	Nocturnal	Variable	N	1	low	Slavens and Slavens 1999
Diporiphora nobbi	Agamidae	3.2	captive	6.30221	Diurnal	Variable	N	1	low	Slavens and Slavens 1999 and Snider and Bowler 1992: 3 years, 2 months
Anolis cuvieri	Dactyloidae	9.3	captive	59.6245	Diurnal	Variable	Y	2	low	Slavens and Slavens 1999, Henderson & Powell 2009: 9 and 3 months
Lacerta trilineata	Lacertidae	10	captive	36.4865	Diurnal	Variable	N	1	low	Slavens and Slavens 1999, Jesus 2012: 7 and 9 months, Foufopoulos and Ives 1999 (6 years, field)
Sceloporus orcutti	Phrynosomatidae	16.3	captive	26.3437	Diurnal	Variable	N	9	low	TAU museum records: 16 years and 3 months
Trapelus sanguinolentus	Agamidae	8.1	captive	30.2605	Diurnal	Variable	N	4	low	TAU museum records: 8 years and 1 month
Chalcides guentheri	Scincidae	7	captive	25.4497	Diurnal	Variable	N	4	low	TAUM museum records: #772 was "7-8 years old"
Paralaudakia lehmanni	Agamidae	4	captive	41.8597	Diurnal	Variable	N	5	low	TAUM museum records: 3.96
Pseudotrapelus sinaitus	Agamidae	6.2	captive	12.7902	Diurnal	Variable	N	24	low	TAUM museum records: 6.19
Lophosaurus spinipes	Agamidae	10	captive	36.6007	Diurnal	Variable	N	1	low	to 10, exceptio lly even longer (Brown 2012)
Diporiphora winneckei	Agamidae	6	captive	3.87806	Diurnal	Variable	N	NA	Questionable	van der Reijden 2008
Hemidactylus mabouia	Gekkonidae	2.6	captive	4.48871	Cathemeral	Variable	N	1	low	Werner et al. 1993
Hemidactylus flaviviridis	Gekkonidae	11	captive	5.78436	Cathemeral	Variable	N	1	low	Werner et al. 1993
Blaesodactylus boivini	Gekkonidae	5.2	captive	35.2499	Cathemeral	Variable	Y	NA	Questionable	Werner et al. 1993
Phyllodactylus microphyllus	Phyllodactylidae	1.7	captive	2.20455	Nocturnal	Variable	N	6	low	Werner et al. 1993
Gehyra australis	Gekkonidae	10	captive	5.68426	Nocturnal	Variable	N	1	low	Werner et al. 1993
Gekko monarchus	Gekkonidae	8	captive	7.80079	Nocturnal	Variable	N	6	low	Werner et al. 1993
Homonota fasciata	Phyllodactylidae	5.6	captive	2.55168	Nocturnal	Variable	N	NA	Questionable	Werner et al. 1993 (as Horrida): still living at 5 years, 7 months of age
Ailuronyx seychellensis	Gekkonidae	6.2	captive	18.527	Nocturnal	Variable	Y	1	low	Werner et al. 1993, Slavens and Slavens 1999
Gekko smithii	Gekkonidae	18	captive	70.8405	Nocturnal	Variable	N	6	low	Werner et al. 1993: 16; Slavens and Slavens 1999: 7 years, 7 months
Homopholis walbergii	Gekkonidae	5.9	captive	16.5785	Cathemeral	Variable	N	2	low	Werner et al. 1993: 3 and 8 months; Slavens and Slavens 1999: 5 and 9 months, Hughes 1988: 3 & 2 months
Rhoptropus boultoni	Gekkonidae	3.9	captive	3.954	Diurnal	Variable	N	1	low	Werner et al. 1993: 3; Hughes 1988: 3 and 11 months
Strophurus elderi	Diplodactylidae	4.7	captive	1.72261	Nocturnal	Variable	N	1	low	Werner et al. 1993: 4.7, Slavens and Slavens 1999: 2.11
Thecadactylus rapicauda	Phyllodactylidae	6.9	captive	23.2033	Nocturnal	Variable	N	1	low	Werner et al. 1993: 6.9; Slavens and Slavens 1999: 3 and 2 months
Rhacodactylus auriculatus	Diplodactylidae	20	captive	34.2472	Nocturnal	Variable	Y	NA	Questionable	Werner et al. 1993: 8; Black 2005: exceed 20, (http://www.thegeckotree.com/gargoylegeckocaresheet.htm):20
Pachydactylus capensis	Gekkonidae	8	captive	3.15824	Nocturnal	Variable	N	1	low	Werner et al. 1993: 8; Hughes 1988, Slavens and Slavens 1999: 2 and 5 months
Gehyra mutilata	Gekkonidae	9.3	captive	2.6689	Nocturnal	Variable	N	1	low	Werner et al. 1993: 9.3; Slavens and Slavens 1999: 2
Oedura tryoni	Diplodactylidae	22	captive	10.5672	Nocturnal	Variable	N	NA	Questionable	Wilson 2012: 22, Porter 2008: 20
Phoenicolacerta laevis	Lacertidae	10	captive	6.18067	Diurnal	Variable	N	10	low	(1136 days in jerusalem, 3 years 7 month in Turkey (Bogin et al. 1999), TAUM museum records: 4.55
Anatololacerta danfordi	Lacertidae	13	wild	6.33824	Diurnal	Variable	N	NA	Questionable	(Beser et al. 2015)
Anolis sagrei	Dactyloidae	8	captive	3.17351	Diurnal	Variable	N	1	low	(Campbell, 2000; "Central Pets", 2003; Kaplan, 2003) 1.8 (females, Schwartz & Henderson 1991), 8: (Campbell, 2000; "Central Pets", 2003; Kaplan, 2003)
Psammodromus algirus	Lacertidae	5	captive	10.7728	Diurnal	Variable	N	14	low	(Comas et al. 2016)
Plestiodon laticeps	Scincidae	7.7	captive	16.8436	Diurnal	Variable	N	2	low	(Cooper and Vitt, 1987; Mitchell, 1994) Carey and Judge 2000, Slavens and Slavens 1999: 7 and 8 months
Anolis tropidolepis	Dactyloidae	2	wild	3.09581	Diurnal	Variable	N	78	acceptable	(Fitch 1973) and none after 18 months, assuming specimens were 1 year old I list 2
Cyclura rileyi	Iguanidae	9.2	captive	611.927	Diurnal	Variable	Y	10	low	(Fry, 2001) Carey and Judge 2000: 7.1; Slavens and Slavens 1999, Henderson & Powell 2009: 9 and 2 months
Uta palmeri	Phrynosomatidae	5	wild	15.4015	Diurnal	Variable	Y	NA	Questionable	(Hews 1993)
Egernia stokesii	Scincidae	25	captive	106.307	Diurnal	Variable	N	550	high	(How et al. ,1999) De Magalhaes & Costa 2009: 18.2, Duffield and Bull 1996: 25, Chapple 2003: 25; Hauschild and Gassner 1995: 25; Slavens and Slavens 1999: 18 and 3 months, Brown 2012: 18.5, Greer 1989: 12
Euleptes europaea	Sphaerodactylidae	21	captive	1.30817	Nocturnal	Variable	N	NA	Questionable	(http://archive.is/1MXSv) Werner et al. 1993: 21, Rogner 1997: >20, Petzold 2008: 21 , 21.5 (Hallmann & Griebeler 2015)
Varanus exanthematicus	Varanidae	12.7	captive	799.324	Diurnal	Variable	N	550	high	(http://lafeber.com/vet/basic-information-for-savan h-monitor/) De Magalhaes & Costa 2009: 12.7; Slavens and Slavens 1999: 10 and 6 months; De Lisle 1996: 17
Podarcis muralis	Lacertidae	16	captive	5.88779	Diurnal	Variable	N	550	high	(http://www. turewonders.org/picture?/2194) Carey and Judge 2000, De Magalhaes & Costa 2009, Castanet 1994, Bogin et al. 1999 (10), Jesus 2012: 10, TAUM museum records: 10.1, Bauwens and Diaz-Uriarte 1997: 38 months, Hallmann and Griebeler 2015: 8.5
Oedura marmorata	Diplodactylidae	21.2	captive	18.066	Nocturnal	Variable	N	55	acceptable	(http://www.alicespringsdesertpark.com.au/kids/ ture/reptiles/gecko.shtml) Carey and Judge 2000, De Magalhaes & Costa 2009, Slavens and Slavens 1999: 21.2; Werner et al. 1993: 8 years
Cordylus tropidosternum	Cordylidae	15	wild	8.49645	Diurnal	Variable	N	1	low	(http://www.drsfostersmith.com/pic/article.cfm?c=6016&articleid=2496) 15:(Reissig, Jens (2014), 7.1:(Slavens and Slavens 1999)
Podarcis pityusensis	Lacertidae	18	captive	5.87336	Diurnal	Variable	Y	1	low	(https://prezi.com/dvi9o1u0qsma/ibiza-wall-lizard/) 3 years 4 months (Bogin et al. 1999); Slavens and Slavens 1999: 4 and 7 months; Jesus 2012: 18
Varanus albigularis	Varanidae	16.7	captive	3539.85	Diurnal	Variable	N	4	low	(https://reptilia .wordpress.com/2008/03/01/white-throated-monitor-varanus-albigularis/) Slavens and Slavens 1999: 12.75, King and Green 1999: 16.7
Rankinia diemensis	Agamidae	10	captive	4.4687	Diurnal	Variable	N	NA	Questionable	(https://www.aussiepythons.com/forum/threads/mountain-dragon-care-sheet.152764/) Michael and Lindenmayer 2010
Bradypodion pumilum	Chamaeleonidae	3.5	captive	8.68575	Diurnal	Variable	N	2	low	(Jackson 2007: mature in 18 months) Carey and Judge 2000, Slavens and Slavens 1999
Anolis nebulosus	Dactyloidae	3	wild	1.75609	Diurnal	Variable	N	NA	Questionable	(Kohler et al. 2014), no more than 3 (Lemos-Espil et al. 2013)
Anolis allogus	Dactyloidae	1.7	captive	2.72466	Diurnal	Variable	Y	NA	Questionable	(Slavens and Slavens 1999)
Phyllodactylus tuberculosus	Phyllodactylidae	5	captive	7.17438	Nocturnal	Variable	N	NA	Questionable	(Slavens and Slavens 1999)
Varanus nebulosus	Varanidae	22	captive	2675.19	Diurnal	Variable	N	NA	Questionable	(TAUM)
Tarentola gigas	Phyllodactylidae	5	captive	41.7656	Nocturnal	Variable	Y	NA	Questionable	(Werner et al. 1993)
Carlia bicarinata	Scincidae	2	wild	1.21125	Diurnal	Variable	Y	11	low	(Zug et al. 1982)
Furcifer verrucosus	Chamaeleonidae	4	captive	44.3468	Diurnal	Variable	Y	NA	Questionable	>1: reproducing more than one year(Karsten et al) LeBerre 2009: 4 years
Anolis humilis	Dactyloidae	1.5	wild	1.0621	Diurnal	Variable	N	78	acceptable	1.5: (Fitch 1973)
Sceloporus variabilis	Phrynosomatidae	1.5	wild	6.72109	Diurnal	Variable	N	NA	Questionable	1.5: (Fitch 1973)
Anolis cupreus	Dactyloidae	1.5	wild	2.14919	Diurnal	Variable	N	NA	Questionable	1.5: (Fitch 1973), (Fleming and Hooker 1975)
Pogona barbata	Agamidae	13	captive	123.548	Diurnal	Variable	N	8	low	1-2:(Andrew P. AmeyA and Joan M. Whittier, 2000) TAUM museum records: 13
Varanus varius	Varanidae	22	captive	3518.33	Diurnal	Variable	N	550	high	15-20:(http://www.photomazza.com/?Varanus-varius) Carey and Judge 2000, De Magalhaes & Costa 2009, Slavens and Slavens 1999: 14 and 8 months, Greer 2005, Greer 1989: individual caught as adult lived for 15 years, 7 months, so as it matures in 7 years list 22
Trachylepis spilogaster	Scincidae	2.2	captive	7.11592	Diurnal	Variable	N	1	low	2: female reproducing once every two years (Goldberg, 2006) Slavens and Slavens 1999
Trachylepis varia	Scincidae	1.9	wild	3.59087	Diurnal	Variable	N	672	high	23 months: (Jacobsen 1982)
Lygodactylus capensis	Gekkonidae	2.14795	captive	0.629304	Diurnal	Variable	N	NA	Questionable	25 months (Jacobsen 1982) (https://www.lllreptile.com/articles/180-cape-dwarf-day-gecko/)
Laemanctus serratus	Corytophanidae	5.2	captive	58.5166	Cathemeral	Variable	N	1	low	3-5:(Hribal, J. & V. Holanova, 2004) Slavens and Slavens 1999
Oplurus cuvieri	Opluridae	21.2	captive	94.9015	Diurnal	Variable	Y	NA	Questionable	4-6:(https://www.saczoo.org/document.doc?id=859), Tacutu et al. 2013: 21.2
Hemidactylus turcicus	Gekkonidae	9	wild	2.35887	Nocturnal	Variable	N	55	acceptable	4-9: Kalayci et al. 2015), 7.9 years (Hallmann & Griebeler 2015) Carey and Judge 2000, De Magalhaes & Costa 2009, Amitai and Bouskila 2001, Werner et al. 1993: 8; Hughes 1988, Slavens and Slavens 1999: 8 and 5 months, Cicek et al. 2015:8
Sceloporus occidentalis	Phrynosomatidae	7	wild	13.418	Diurnal	Variable	N	NA	Questionable	5-7:(http://www.friendsofedgewood.org/western-fence-lizard); Alcala 1966 (p216, citing Fitch 1940) says 5+
Agama agama	Agamidae	8	captive	20.2139	Diurnal	Variable	N	22	low	6-10:( Patricia Bartlett, Billy Griswold, Richard D. Bartl 2001) 28:(http://southshieldslizards.co.uk/factfiles/Lizards/RedHeadedRockAgama.php), see Hughes 1988, Snider and Bowler 1992: 2 and 6 months, all look to little; a report on http://www.reptileforums.co.uk/forums/lizards/535882-agamas-life-span.html says 8
Gekko gecko	Gekkonidae	23.6	captive	53.2138	Nocturnal	Variable	N	1000	high	7-10:(http://www.tokaygeckos.org/tokay-gecko-fact-sheet) Carey and Judge 2000, De Magalhaes & Costa 2009, Werner et al. 1993: 20 years, 1 month; Slavens and Slavens 1999: 23.6
Chlamydosaurus kingii	Agamidae	15	captive	301.36	Diurnal	Variable	N	550	high	8-12:(http://www.reptile-centre.com/frilled-lizard) Brown 2012: usually 10-15, exceptio lly even longer, Carey and Judge 2000, De Magalhaes & Costa 2009, Slavens and Slavens 1999: 9.9
Sceloporus graciosus	Phrynosomatidae	8	wild	6.76204	Diurnal	Variable	N	NA	Questionable	Alcala 1966 (p216, citing Stebbins 1948) 3-5:(http://www.lizardsarchive.com/care-sheets/sagebrush-lizard.php)
Eremias strauchi	Lacertidae	7	wild	5.77027	Diurnal	Variable	N	18	low	Arakelyan et al. 2011: 5; Altunisik et al. 2013: 5 for females, 7 for males,Uzum et al. 2014.
Hoplodactylus duvaucelii	Diplodactylidae	50	wild	32.1791	Nocturnal	Variable	Y	55	acceptable	Bannock et al. 1999: 36, Gutierrez et al. 2013, Hoare et al. 2005: 36, Wilson 2010: 50, Morgan-Richards et al. 2015 (>36 years), Cree and Hare 2016: 50 De Magalhaes & Costa 2009, Werner et al. 1993, Slavens and Slavens 1999, A stasiadis and Whitaker 1987: 25
Sceloporus cowlesi	Phrynosomatidae	5	wild	8.09842	Diurnal	Variable	N	2470	high	Bateman and Chung-Maccoubrey 2012: 5
Anolis mariarum	Dactyloidae	2	wild	2.78795	Diurnal	Variable	N	27	low	Bock et al. 2010: almost 2 years after caught as juveniles
Timon lepidus	Lacertidae	35	captive	85.8759	Diurnal	Variable	N	550	high	Bohme and Esser 2015: maximum 11 Carey and Judge 2000, De Magalhaes & Costa 2009: 17, Castanet 1994: 17; Slavens and Slavens 1999: 14.5, Jesus 2012: 28 (citing Philipp Wagner, pers. com.), Bauwens and Diaz-Uriarte 1997: 59 months; Bohme and Esser 2015: 35, 18.5 (Hallmann and Griebeler 2015)
Tropidurus hispidus	Tropiduridae	2	captive	24.246	Diurnal	Variable	N	16	low	Carey and Judge 2000 Marchioro et al. 2005
Mediodactylus kotschyi	Gekkonidae	8	captive	1.44932	Cathemeral	Variable	N	28	low	Cicek et al. 2015: 2-8 Amitai and Bouskila 2001, Werner et al. 1993 (1-4 years), TAUM museum records: 4.8, Beutler 1981 - adults lived for 6 years in captivity, which he takes as 9 and I as 7, Werner 2016 (max 6 years in captivity)
Tarentola mauritanica	Phyllodactylidae	14	captive	4.33241	Cathemeral	Variable	N	550	high	Cicek et al. 2015: ecological longevity 8-9 Carey and Judge 2000, De Magalhaes & Costa 2009: 14, Castanet 1994, Werner et al. 1993 ( 2 years, 5 months; 14 years in Table 2); Slavens and Slavens 1999: 14,Cicek et al. 2015: 14 and ecological longevity 8-9
Lacerta viridis	Lacertidae	10	wild	24.9904	Diurnal	Variable	N	550	high	De Magalhaes & Costa 2009: 10, Castanet 1994: 10; Jesus 2012: 8, Bauwens and Diaz-Uriarte 1997: 38 months, Foufopoulos and Ives 1999 (5 years in the field) Slavens and Slavens 1999: 3 and 11 months
Sceloporus undulatus	Phrynosomatidae	4	captive	7.86811	Diurnal	Variable	N	55	acceptable	Degenhardt et al. 1996, see Alcala 1966, p216 citing Crenshaw 5: (Haenel and John-Alder, 2002; Smith, 1946); (Slavens and Slavens 1999: 1 and 11 months)
Sceloporus magister	Phrynosomatidae	6	wild	30.4	Diurnal	Variable	N	550	high	Degenhardt et al. 1996: 6 (Slavens and Slavens 1999: 5 and 10 months)
Eulamprus tympanum	Scincidae	15	wild	11.758	Diurnal	Variable	N	NA	Questionable	Dubey et al. 2013
Phelsuma ornata	Gekkonidae	3	wild	2.1121	Diurnal	Variable	Y	NA	Questionable	females rarely live longer than 1 breeding season (Rogner 1997), (http://www.darwininitiative.org.uk/documents/15038/21442/15-038%20FR%20Ann5.10%20Ranger%20info%20or te%20day%20gecko.pdf):3
Sceloporus tristichus	Phrynosomatidae	5	wild	9.4704	Diurnal	Variable	N	NA	Questionable	few live more than 4 years (Jones and Lovich 2009), so I write 5
Ctenosaura hemilopha	Iguanidae	13	wild	538.07	Diurnal	Variable	N	55	acceptable	Grismer 2002: "I have observed a colony of three to six lizards that has lived on the same rock pile for at least ten years." - Lee confirms (pers. com. 21.06.2014 at least one individual was there over the entire span ("At least one of the individuals was the same one because it had a deformed tail that was quite recognizable") Carey and Judge 2000, De Magalhaes & Costa 2009, Slavens and Slavens…
Cyclura carinata	Iguanidae	14	wild	546.916	Diurnal	Variable	Y	NA	Questionable	Henderson & Powell 2009: 14
Anolis bimaculatus	Dactyloidae	7	captive	34.8093	Diurnal	Variable	Y	10	low	Henderson & Powell 2009: 3 De Magalhaes & Costa 2009: 7; Slavens and Slavens 1999: 2 years, 11 months
Phyllurus platurus	Carphodactylidae	20	captive	3.93095	Nocturnal	Variable	N	NA	Questionable	Iezzi 2008: 9 Iezzi 2008: 20
Gehyra variegata	Gekkonidae	26	wild	2.44338	Nocturnal	Variable	N	2	low	Kitchener et al. 1988 and Wilson 2012:9, Werner et al. 1993: 10, Gruber and Henle 2008: 16, Klaus Henle, 2013: 26, Greer 1989: 5
Goniurosaurus kuroiwae	Eublepharidae	9.4	captive	3.7634	Nocturnal	Variable	Y	1	low	Kurita and Toda 2013: 83 months Slavens and Slavens 1999: 9 and 5 months; Kalayci et al. 2015: 7 years
Sphaerodactylus vincenti	Sphaerodactylidae	4	wild	0.511737	Cathemeral	Variable	Y	46	acceptable	Leclair and Leclair 2011: 48 months
Anolis limifrons	Dactyloidae	1	wild	1.58741	Diurnal	Variable	N	50	acceptable	less than 5% of females reach 1 year (Andrews 1979)
Anolis gemmosus	Dactyloidae	3	wild	5.32703	Diurnal	Variable	N	253	high	Miyata 2013 says a marked adult was captured after 2 years
Furcifer lateralis	Chamaeleonidae	3	captive	8.7	Diurnal	Variable	Y	NA	Questionable	Necas 1999: 1 Necas 1999: up to 3 in captivity, Rogner 1997: 2-3; LeBerre 2009: 2, Glaw and Vences 2007: 2-3 in captivity
Sceloporus grammicus	Phrynosomatidae	3	wild	5.78803	Diurnal	Variable	N	20	low	Ortega-Rubio et al. 1993
Hemidactylus brookii	Gekkonidae	4	wild	2.89656	Nocturnal	Variable	N	1	low	Pancharat and Kumbar 2005: 4 if LAGs correspond to years Carey and Judge 2000: 1.1, Hughes 1988, Werner et al. 1993 and Slavens and Slavens 1999: 1.1
Liolaemus leopardinus	Liolaemidae	12	wild	9.34611	Diurnal	Variable	N	10	low	Santoyo-Brito et al. 2018
Anolis laeviventris	Dactyloidae	2	wild	2.17634	Diurnal	Variable	N	NA	Questionable	Savage 2002
Amphibolurus muricatus	Agamidae	4	captive	17.7445	Diurnal	Variable	N	NA	Questionable	Smith et al. 2013: 4 6-7:(https://museumvictoria.com.au/discoverycentre/infosheets/lizards-found-in-victoria/jacky-lizard/)
Amphibolurus norrisi	Agamidae	7	wild	15.4599	Diurnal	Variable	N	NA	Questionable	Smith et al. 2013: 7
Pogona vitticeps	Agamidae	18	wild	107.75	Diurnal	Variable	N	1	low	Tacutu et al. 2013 (age): 12 Slavens and Slavens 1999, Snider and Bowler 1992: 10 and almost 2 months,
Urosaurus ornatus	Phrynosomatidae	3	wild	4.5502	Diurnal	Variable	N	882	high	Tinkle and Dunham 1983: 3 >1 :(http://www.dlblanc.com/coloherp/careshts/other/colo-liz.php#U.or tus)
Saltuarius cornutus	Carphodactylidae	2	wild	12.5529	Nocturnal	Variable	N	1	low	Werner et al. 1993: 2
Tropidurus torquatus	Tropiduridae	3	wild	17.9293	Diurnal	Variable	N	413	high	Wiederhecker et al. 2003
Eumeces schneideri	Scincidae	22	captive	49.3836	Diurnal	Terrestrial	N	5	low	Carey and Judge 2000: 9.3, at least 12, Amitai and Bouskila 2001; Slavens and Slavens 1999: 9.25, Hughes 1988: 18 in Jerusalem, Hauschild and Gassner 1995: 18; TAUZ: (June 2014), so 22 at least, Lang: 20 years
Mochlus sundevalli	Scincidae	2.5	captive	12.3287	Diurnal	Fossorial	N	1	low	Slavens and Slavens 1999
Bassiana duperreyi	Scincidae	7	wild	4.03674	Diurnal	Terrestrial	N	NA	Questionable	Hutchinson 1993: 7 years
* Number of individuals count for each species when longevity were estimated.
N<30 = low sample
N<? = unknown sample = questionable
N≥30 = acceptable sample
N≥100 = high sample

## Sheet: Longevity References
Authors of bibliography:	Full References:
Abts, 1987	Abts, M. 1987. Environment and variation in life history traits of the chuckwalla, Sauromalus obesus. Ecological Monographs, 57: 215-232.
Adams, 2004	Adams, C. 2004. Obituary. Iguana Specialist Group Newsletter, 7/1: 1-14. Accessed February 28, 2011 at http://www.iucn-isg.org/newsletters/pdf/ISG_News_7(1).pdf.
Aguirre and Gatica, 2010	Aguirre T. A. y Gatica C. A. 2010. Ficha técnica de Coleonyx brevis. En: Gatica C. A. (compilador). Diagnóstico de algunas especies de anfibios y reptiles del Norte de México. Laboratorio de Ecología y Biodiversidad Animal. Instituto de Ciencias Biomédicas, Universidad Autónoma de Ciudad Juárez. Bases de datos SNIB-CONABIO. Proyecto No. CK007. México, D.F.
Alcala & Brown, 1966	Alcala, A. C., & Brown, W. C. (1966). Thermal relations of two tropical lizards on Negros Island, Philippine Islands. Copeia, 1966(3), 593-594.
Alcala, 1966	ALCALA, A. (1966). Populations of three tropical lizards on Negros Island, Philippines. Unpubl (Doctoral dissertation, Ph. D. Thesis, Stanford Univ).
Alderton & Tanner, 1991	Alderton, D., & Tanner, B. (1991). Crocodiles & alligators of the world. Facts on file.
Alderton, 1988	Alderton, D. (1988). Turtles & tortoises of the world. Facts on File. Inc., New York.
Allison, 1982	Allison, A. (1982). Distribution and ecology of New Guinea lizards. In Biogeography and ecology of New Guinea (pp. 803-813). Springer, Dordrecht.
ALTUNIŞIK et al. 2013	ALTUNIŞIK, A., GÜL, Ç., ÖZDEMİR, N., TOSUNOĞLU, M., & ERGÜL, T. (2013). Age structure and body size of the Strauch's racerunner, Eremias strauchi strauchi Kessler, 1878. Turkish Journal of Zoology, 37(5), 539-543.
Anastasiadis & Whitaker, 1987	Anastasiadis, J. M., & Whitaker, A. H. (1987). Longevity of free-living Hoplodactylus maculatus (Reptilia: Gekkonidae). New Zealand journal of ecology, 10, 141-142.
Andreone & Guarino, 2003	Andreone, F., & Guarino, F. M. (2003). Giant and long-lived? Age structure in Macroscincus coctei, an extinct skink from Cape Verde. Amphibia-Reptilia, 24(4), 459-470.
Andreone et al. 2005	Andreone, F., Guarino, F. M., & Randrianirina, J. E. (2005). Life history traits, age profile, and conservation of the panther chameleon, Furcifer pardalis (Cuvier 1829), at Nosy Be, NW Madagascar. Tropical Zoology, 18(2), 209-225.
Antonio, 1980	Antonio, F. 1980. Mating behavior and reproduction of the eyelash viper (Bothrops schlegeli) in captivity. Herpetologica, 36/3: 231-233.
Arakelyan et al. 2013	Arakelyan, M., Petrosyan, R., Ilgaz, Ç., Kumlutaş, Y., Durmuş, S. H., Tayhan, Y., & Danielyan, F. (2013). A skeletochronological study of parthenogenetic lizards of genus Darevskia from Turkey. Acta Herpetologica, 8(2), 99-104.
Arribas, 2004	Arribas, O. J. (2004). Characteristics of the reproductive biology of Iberolacerta aurelioi (Arribas, 1994). Herpetozoa, 17, 3-18.
Ashton, 2005	Ashton, K. G. (2005). Life history of a fossorial lizard, Neoseps reynoldsi. Journal of Herpetology, 39(3), 389-395.
Auffenberg, 1981	Auffenberg, W. (1981). The behavioral ecology of the Komodo monitor. University Press of Florida.
Avery, 1975	Avery, R. 1975. Age-structure and longevity of common lizard (Lacerta vivipara) populations. Journal of Zoology, 176/4: 555-558.
Axtell & Axtell, 1971	Axtell, R. W., & Axtell, C. A. (1971). A new lizard (Sceloporus jarrovii cyanostictus) from the Sierra Madre of Coahuila, Mexico. Copeia, 89-98.
Baig et al. 2012	Baig, K. J., Wagner, P., Ananjeva, N. B., & Boehme, W. (2012). A morphology-based taxonomic revision of Laudakia Gray, 1845 (Squamata: Agamidae). Vertebrate Zoology, 62(2), 213-260.
Bannock et al. 1999	Bannock, C. A., Whitaker, A. H., & Hickling, G. J. (1999). Extreme longevity of the common gecko (Hoplodactylus maculatus) on Motunau Island, Canterbury, New Zealand. New Zealand Journal of Ecology, 101-103.
Barbault, 1976	Barbault, R. (1976). Population dynamics and reproductive patterns of three African skinks. Copeia, 483-490.
Barrows et al. 2010	Barrows, C. W., Rotenberry, J. T., & Allen, M. F. (2010). Assessing sensitivity to climate change and drought variability of a sand dune endemic lizard. Biological Conservation, 143(3), 731-736.
Bartlett and Bartlett, 2000	Bartlett, R., P. Bartlett. 2000. Ball Pythons. Hauppauge, New York: Barrons Educational series.
Bartlett and Wagner, 1997	Bartlett, P., E. Wagner. 1997. Pythons: A complete pet owners manual. Hauppaauge, NY 11718: Barons Educactional Series, Inc.
Bartlett et al. 2001	Bartlett, P., B. Griswold, R. Bartlett. 2001. Reptiles, amphibians, and invertebrates: an identification and care guide. Hauppauge, New York: Barrons Educational series.
Bartlett, 2001	Bartlett, R., P. Bartlett. 2001. Day Geckos. Hauppauge, NY: Barron's Educational Series, Inc..
Bateman & Chung-MacCoubrey, 2012	Bateman, H. L., & Chung-MacCoubrey, A. (2012). Growth and activity of Sceloporus cowlesi (southwestern fence lizard).
Bateman et al. 2010	Bateman, H. L., Snell, H. L., Chung-MacCoubrey, A., & Finch, D. M. (2010). Growth, activity, and survivorship from three sympatric parthenogenic whiptails (Family Teiidae). Journal of Herpetology, 44(2), 301-306.
Bauer et al. 2004	Bauer, A. M., Sumontha, M., Grossmann, W., PAUWELS, O. S., & VOGEL, G. (2004). A new species of Dixonius (Squamata: Gekkonidae) from Kanchanaburi Province, western Thailand. Current herpetology, 23(1), 17-26.
Bauwens & Diaz-Uriarte, 1997	Bauwens, D., & Diaz-Uriarte, R. (1997). Covariation of life-history traits in lacertid lizards: a comparative study. The American Naturalist, 149(1), 91-111.
Beane et al. 2014	Beane, J. C., Graham, S. P., Thorp, T. J., & Pusser, L. T. (2014). Natural history of the southern hognose snake (Heterodon simus) in North Carolina, USA. Copeia, 2014(1), 168-175.
Behler & King, 2000	Behler, J. L., & King, F. W. (2000). National Audubon Society field guide to North American amphibians and reptiles.
Blair, 1976	Blair, W. 1976. Some aspects of the biology of the ornate box turtle, Terrapene ornata. The Southwestern Naturalist, 21/1: 89-103.
Blair, 1991	Blair, D. 1991. "West Indian Iguanas of the Genus Cyclura: Their Current Status in the Wild, Conservation Priorities and Efforts to Breed Them in Captivity" (On-line pdf). Accessed March 06, 2011 at http://www.vipersgarden.at/PDF/DB_Cyclura.pdf.
Bock et al. 2010	Bock, B. C., Zapata, A. M., & Páez, V. P. (2010). Survivorship rates of adult Anolis mariarum (Squamata: Polychrotidae) in two populations with differing mean and asymptotic body sizes. Papéis Avulsos de Zoologia (São Paulo), 50(3), 43-50.
Bogaerts, 2006	Bogaerts, S. (2006). First data in the reproduction of Lanzai’s skinks, Chalcides lanzai Pasteur, 1967. Podarcis, 7(1).
Bogin et al. 1999	Bogin, Y., Efrati, N. P., & Werner, Y. L. (1999). Captive Longevity in Lacerta laevis laevis (Reptilia: Sauria): Hypothetical Effects of Sex, Temperature and Climate. Russian Journal of Herpetology, 6(2), 87-91.
Bonin et al. 2006	Bonin, F., Devaux, B., & Dupré, A. (2006). Turtles of the World. JHU Press.
Boretto et al. 2015	Boretto, J. M., Cabezas‐Cartes, F., & Ibargüengoytía, N. R. (2015). Energy allocation to growth and reproduction in a viviparous lizard endemic to the highlands of the Andes, Argentina. Journal of Zoology, 297(1), 77-86.
Bouskila & Amitai, 2001	Bouskila, A., & Amitai, P. (2001). Handbook of amphibians and reptiles of Israel. Jerusalem: Keter Publishing House.
Bowler, 1977	Bowler, J. K. (1977). Longevity of reptiles and amphibians in North American collections as of 1 November, 1975. Society for the Study of Amphibians and Reptiles.
Boycott & Morgan, 1990	Boycott, R. C., & Morgan, D. R. (1990). Observations on Reproduction in Southern African Boomslang, Dispholidus typus. The Journal of the Herpetological Association of Africa, 38(1), 51-52.
Branch, 2012	Branch, B. (2012). Tortoises, terrapins & turtles of Africa. Random House Struik.
Brito & Rebelo, 2003	Brito, J. C., & Rebelo, R. (2003). Differential growth and mortality affect sexual size dimorphism in Vipera latastei. Copeia, 2003(4), 865-871.
Brito et al. 2001	BRITO, S.P.; ABE, A.S., & ANDRADE, D.V. 2001.Tupi nambis merianae Tegu lizard - Longevity.Herpetological Review, 32(4): 260–261.
Broadley, 1983	Broadley, D. G. (1983). FitzSimons' snakes of southern Africa. Delta Books.
Brochu, 2003	Brochu, 2003. "TAXONOMY & NOMENCLATURE" (On-line). Accessed November 18, 2008 at http://spot.colorado.edu/~humphrey/fact%20sheets/gharial/gharial.htm#threats.
Bronikowski and Vleck, 2010	Bronikowski, A., D. Vleck. 2010. Metabolism, body size and life span: a case study in evolutionarily divergent populations of the garter snake (Thamnophis elegans). Integrative and Comparative Biology, 50.5: 880-887.
Brown, 2012	Brown, D. (2012) A guide to Australian dragons in captivity.Reptile Publications, Burleigh, Qld.
Brushko, 1979	BRUSHKO, Z. (1979). AGE STRUCTURE OF THE POPULATION AND LENGTH OF LIFE OF THE BIG-EARED ROUNDHEAD LIZARD IN THE SANDY PLAINS OF THE CENTRAL COURSE OF THE ILI RIVER. SOVIET JOURNAL OF ECOLOGY, 10(1), 84-86.
Bülbül et al. 2016	Bülbül, U., Kurnaz, M., Eroğlu, A. İ., Koç, H., & Kutrup, B. (2016). Age and growth of the red-belied lizard, Darevskia parvula. Animal Biology, 66(1), 81-95.
Cabezas-Cartes et al. 2015	Cabezas-Cartes, F., Boretto, J. M., & Ibargüengoytía, N. R. (2015). Age, growth and life-history parameters of an endemic vulnerable lizard from Patagonia, Argentina. The Herpetological Journal, 25(4), 215-224.
Campbell, 2000	Campbell, T. 2000. "The brown anole, Anolis sagrei" (On-line ). Institute for Biological Invasions Invader of the Month. Accessed March 19, 2003 at http://invasions.bio.utk.edu/invaders/sagrei.html.
Carey & Judge, 2000	Carey, J. R., & Judge, D. S. (2000). Longevity records: life spans of mammals, birds, reptiles, amphibians and fish. Odense Monographs on Population Aging (ed. B. Jeaune and JW Vaupel). Odense: Odense University Press.
Carr & Giraldo, 2009	Carr, J. L., & Giraldo, A. (2009). Rhinoclemmys nasuta (Boulenger 1902), Large-Nosed Wood Turtle, Chocoan River Turtle. Chelon Res Monogr, 5, 034-1.
Carr, 1952	Carr, A. 1952. Handbook of Turtles. Ithaca, New York, USA: Cornell University Press.
Castanet & Baez, 1991	Castanet, J., & Baez, M. (1991). Adaptation and evolution in Gallotia lizards from the Canary Islands: age, growth, maturity and longevity. Amphibia-Reptilia, 12(1), 81-102.
Castanet, 1994	Castanet, J. (1994). Age estimation and longevity in reptiles. Gerontology, 40(2-4), 174-192.
Chacón et al. 2016	Chacón, Danilo & Gomez, Aaron & Corrales, Greivin. (2016). Captive longevity for Micrurus nigrocinctus (Serpentes: Elapidae) at Instituto Clodomiro Picado, Costa Rica. Mesoamerican Herpetology. 3. 1101-1104.
Chapple, 2003	Chapple, D. G. (2003). Ecology, life-history, and behavior in the Australian scincid genus Egernia, with comments on the evolution of complex sociality in lizards. Herpetological Monographs, 17(1), 145-180.
Çiçek et al. 2012	Çiçek, K., Kumaş, M., Ayaz, D., & Tok, C. V. (2012). Preliminary data on the age structure of Phrynocephalus horvathi in Mount Ararat (Northeastern Anatolia, Turkey). Biharean Biologist, 6(2), 112-115.
Cissé et al. 1977	Cissé, M., Karns, D. R., & Karns, K. C. (1977). Aspects of the ecology of Acanthodactylus dumerili Milne Edwards (Sauria: Lacertidae) in Senegal. Bul. Inst. Fondam. Afr. Noire Ser. A Sai. Nat, 39(1), 190-218.
Comas et al. 2016	Comas, M., Reguera, S., Zamora–Camacho, F. J., Salvadó, H., & Moreno–Rueda, G. (2016). Comparison of the effectiveness of phalanges vs. humeri and femurs to estimate lizard age with skeletochronology. Animal Biodiversity and Conservation, 39(2), 237-240.
Conant and Collins, 1998	Conant, R., J. Collins. (1998). Reptiles and Amphibians: Eastern/Central North America. New York: Houghton Mifflin Company.
Converse et al. 2005	Converse, S., J. Iverson, J. Savidge. 2005. Demographics of an ornate box turtle population experiencing minimal human-induced disturbances. Ecological Applications, 15/6: 2171-2179.
Cooper and Vitt, 1987	Cooper, W., L. Vitt. 1987. Deferred agonistic behavior in a long-lived scincid lizard Eumeces laticeps: Field and laboratory data on the roles of body size and residence in agonistic strategy. Oecologia, 72/3: 321-326.
Corry et al. 2010	Corry, E., Martin, L., Morton, M. N., Hilton, G. M., Young, R. P., & Garcia, G. (2010). A species action plan for the Montserrat galliwasp Diploglossus montisserrati. Montserrat: Department of Environment.
Cree & Hare, 2016	Cree, A., & Hare, K. M. (2016). Reproduction and life history of New Zealand lizards. Chap. 7. New Zealand lizards. Springer, Cham.
Crews and Gans, 1992	Crews, D., C. Gans. 1992. Biology of the Reptilia: Physiology: Hormones, Brain, and Behavior. Chicago: University of Chicago Press.
Cuadrado, 2001	Cuadrado, M., MARTÍN, J., & LÓPEZ, P. (2001). Camouflage and escape decisions in the common chameleon Chamaeleo chamaeleon. Biological Journal of the Linnean Society, 72(4), 547-554.
de Espinoza et al. 1990	de Espinoza, N. C., Rothenstein, D., Salas, A., & Werner, Y. L. (1990). Radiation and convergence among desert geckos: Phyllodactylus species resembling both Ptyodactylus and Stenodactylus. Amphibia-Reptilia, 11(1), 1-13.
De Magalhaes & Costa, 2009	De Magalhaes, J. P., & Costa, J. (2009). A database of vertebrate longevity records and their relation to other life‐history traits. Journal of evolutionary biology, 22(8), 1770-1774.
de Magalhaes, 2013	de Magalhaes, J. 2013. "AnAge entry for Crocodylus novaeguineae" (On-line). The Animal Ageing and Longevity Database. Accessed June 19, 2013 at http://genomics.senescence.info/species/entry.php?species=Crocodylus_novaeguineae.
De Vosjoli, 1992	De Vosjoli, P. 1992. The Green Iguana Mannual. Lakeside, California: Advanced Vivarium Systems.
Dearing & Schall 1994	Dearing, M. D., & Jos. J. Schall. (1994). Atypical reproduction and sexual dimorphism of the tropical Bonaire Island whiptail lizard, Cnemidophorus murinus. Copeia, 760-766.
Degenhardt et al. 1996	Degenhardt, William G.; C. W. Painter, and A. H. Price 1996. Amphibians and reptiles of New Mexico. Univ. New Mexico Press, 431 pp.
Dickinson & Fa, 2000	Dickinson, H. C., & Fa, J. E. (2000). Abundance, demographics and body condition of a translocated population of St Lucia whiptail lizards (Cnemidophorus vanzoi). Journal of Zoology, 251(2), 187-197.
Dubey et al. 2013	Dubey, S., Sinsch, U., Dehling, M. J., Chevalley, M., & Shine, R. (2013). Population demography of an endangered lizard, the Blue Mountains Water Skink. BMC ecology, 13(1), 4.
Dubos, 2013	Dubos, N. (2013). New locality record for Phelsuma grandis (Sauria: Gekkonidae) in Reunion, in sympatry with the critically endangered Phelsuma inexpectata. Herpetology Notes, 6, 309-311.
Duffield & Bull, 1996	Duffield, G. A., & Bull, M. C. (1996). Characteristics of the litter of the Gidgee skink, Egernia stokesii. Wildlife Research, 23(3), 337-341.
Dunham, 1981	Dunham, A. E. (1981). Populations in a fluctuating environment: the comparative population ecology of the iguanid lizards Sceloporus merriami and Urosaurus ornatus.
Eckhardt et al. 2017	Eckhardt, F., Kappeler, P. M., & Kraus, C. (2017). Highly variable lifespan in an annual reptile, Labord’s chameleon (Furcifer labordi). Scientific reports, 7(1), 11397.
Eipper, 2012	Eipper, S. (2012). A Guide To--Australian Snakes in Captivity: Elapids & Colubrids. Reptile Publications.
Eisenberg & Werning, 2012	Eisenberg, T., & Werning, H. (2012). Phymaturus cf. palluma in captivity: observations on its reproduction and biology. Salamandra, 48, 198-206.
El Hassan et al. 1999	El Hassan, E. M., Znari, M., & Brown, R. P. (1999). Skeletochronology and mark±recapture assessments of growth in the North African agamid lizard (Agama impalearis).
Ergül et al. 2014	Ergül, T., Özdemir, N., Gül, Ç., & Tosunoğlu, M. (2014). Variation in body size and age structure of Stellagama stellio (L., 1758)(Reptilia: Agamidae) from Turkey. Acta Zool Bulgar, 66, 65-72.
Ernst & Barbour, 1989	Ernst, C. H., & Barbour, R. W. (1989). Snakes of Eastern North America. Distributed by arrangement with University Pub. Associates.
Ernst & Ernst, 2003	Ernst, C. H., & Ernst, E. M. (2003). Snakes of the United States and Canada. Smithsonian Books.
Ernst & Lovich, 2009	Ernst, C. H., & Lovich, J. E. (2009). Turtles of the united states and Canada. JHU Press.
Ernst and Ernst, 2011	Ernst, C., E. Ernst. 2011. Venomous Reptiles of the United States, Canada, and Northern Mexico. Baltimore, Maryland: Johns Hopkins University Press.
Ernst et al. 1994	Ernst, C., R. Barbour, J. Lovich. 1994. Turtles of the United States and Canada. Washington, D.C., USA: Smithsonian Institution Press.
Eroglu et al. 2017	Eroglu, A. I., Bulbul, U., & Kurnaz, M. (2017). Age structure and growth in a Turkish population of the Crimean Wall Lizard, Podarcis tauricus (PALLAS, 1814)(Squamata: Sauria: Lacertidae). HERPETOZOA, 29(3-4), 125-133.
Fellers et al. 1998	Fellers, G. M., Drost, C. A., Mautz, W. J., & Murphey, T. G. (1998). Ecology of the Island Night Lizard, Xantusia riversiana, on San Nicolas Island, California (p. 80). US Navy.
Ferguson et al. 2004	Ferguson, G., J. Murphy, J. Ramanamanjato, . Raselimanana. 2004. The Panther Chameleon: Color Variation, Natural History, Conservation, and Captive Management. Malabar, Florida: Krieger Publishing Company.
Fielder et al. 2015	Fielder, D. P., Limpus, D. J., & Limpus, C. J. (2015). Reproduction and population ecology of the vulnerable western sawshelled turtle, Myuchelys bellii, in the Murray–Darling Basin, Australia. Australian Journal of Zoology, 62(6), 463-476.
Filippi & Luiselli, 2000	Filippi, E., & Luiselli, L. (2000). Status of the Italian snake fauna and assessment of conservation threats. Biological Conservation, 93(2), 219-225.
Fitch, 1960	Fitch, H. 1960. Autecology of the copperhead. University of Kansas Museum of Natural History Publications, 13: 85-288.
Fitch, 1973	Fitch, H. S. (1973). Population structure and survivorship in some Costa Rican lizards. Estructura poblacional y sobrevivencia en algunas lagartijas costarricenses. Occasional Papers, (18), 1-41.
Fleming & Hooker, 1975	Fleming, T. H., & Hooker, R. S. (1975). Anolis cupreus: the response of a lizard to tropical seasonality. Ecology, 56(6), 1243-1261. R. S. (1975). Anolis cupreus: the response of a lizard to tropical seasonality. Ecology, 56(6), 1243-1261.
Fornasiero et al. 2016	Fornasiero, S., Bonnet, X., Dendi, F., & Zuffi, M. A. (2016). Growth, longevity and age at maturity in the European whip snakes, Hierophis viridiflavus and H. carbonarius. Acta Herpetologica, 11(2), 135-149.
Foufopoulos & Ives, 1999	Foufopoulos, J., & Ives, A. R. (1999). Reptile extinctions on land-bridge islands: life-history attributes and vulnerability to extinction. The American Naturalist, 153(1), 1-25.
Fry, 2001	Fry, S. K. (2001). Ecology of the endangered Sandy Cay rock iguana, Cyclura rileyi cristata, in the Bahamas (Doctoral dissertation, Loma Linda University).
Frye, 1995	Frye, F. 1995. Iguana Iguana, Guide for Successful Captive Care. Malabar, Florida: Krieger Publishing Company.
Gadsden & Castañeda, 2013	Gadsden, H., & Castañeda, G. (2013). Life history of the marbled whiptail lizard Aspidoscelis marmorata from the central Chihuahuan desert, Mexico. Acta Herpetologica, 8(2), 81-91.
Garstka, 1981	Garstka, W. 1981. Female sex pheromone in the skin and circulation of garter snake. Science, 214: 681-683.
Gates, 1963	Gates, G. O. (1963). ECOLOGY OF THE IGUANID LIZARD, UROSAURUS GRACIOSUS, IN ARIZONA.
Germano, 1994	Germano, D. J. (1994). Comparative life histories of North American tortoises. Biology of North American Tortoises, 175-185.
Gibson et al. 2015	Gibson, S., Penniket, S., & Cree, A. (2015). Are viviparous lizards from cool climates ever exclusively nocturnal? Evidence for extensive basking in a New Zealand gecko. Biological Journal of the Linnean Society, 115(4), 882-895.
Goldsmith, 1984	Goldsmith, S. 1984. Aspects of the Natural History of the Rough Green Snake, Opheodrys aestivus (Colubridae). The Southwestern Naturalist, Vol. 29, No. 4: 445-452.
Gorzula et al. 1997	Gorzula, S., W. Nsiah, W. Oduro. 1997. "Survey of the Status and Management of the Royal Python (Python regius) in Ghana" (On-line pdf). Accessed April 23, 2010 at ec.europa.eu/environment/cites/pdf/studies/royal_python_ghana.pdf.
Gray, 2014	Gray, Brian S. 2014. Carphophis amoenus amoenus (eastern wormsnake) longevity. Herpetological Review 45 (2): 256
Greer, 1989	Greer, A. E. (1989). The biology and evolution of Australian lizards. Surrey Beatty and Sons.
Greer, 2006	Greer, A. E. (2006). Encyclopedia of Australian reptiles. Australian Museum Online http://www. amonline. net. au/herpetology/research/encyclopedia. pdf Version date, 7.
Grenard, 1991	Grenard, S. 1991. Handbook of Alligators and Crocodiles. Malabar, Florida: Krieger Publishing Company.
Grismer, 2002	Grismer, L. L. (2002). Amphibians and reptiles of Baja California, including its Pacific islands and the islands in the Sea of Cortés (Vol. 4). Univ of California Press.
Gruber & Henle, 2008	Gruber, B., & Henle, K. (2008). Analysing the effect of movement on local survival: a new method with an application to a spatially structured population of the arboreal gecko Gehyra variegata. Oecologia, 154(4), 679-690.
Guggisberg, 1972	Guggisberg, C. 1972. Crocodiles: Their Natural History, Folklore, and Conservation. Great Britain: David & Charles Limited.
Gul et al. 2015	GÜL, S., ÖZDEMİR, N., Avci, A., KUMLUTAŞ, Y., & Ilgaz, C. (2015). Altitudinal effects on the life history of the Anatolian lizard (Apathya cappadocica, Werner 1902) from southeastern Anatolia, Turkey. Turkish Journal of Zoology, 39(3), 507-512.
Gul et al. 2017	Gul, S., Ilgaz, C., Kumlutas, Y., & Candan, K. (2017). Age structure and growth pattern in an east Anatolian high altitude population of Iranolacerta brandtii (DE FILIPPI, 1863). HERPETOZOA, 30(1-2), 3-7.
Gutiérrez et al. 2013	Gutiérrez, J. A., Piantoni, C., & Ibargüengoytía, N. (2013). Altitudinal effects on life history parameters in populations of Liolaemus pictus argentinus (Sauria: Liolaemidae).
Hall & Fitch, 1971	Hall, R. J., & Fitch, H. S. (1971). Further observations on the demography of the great plains skink (Eumeces obsoletus). Transactions of the Kansas Academy of Science (1903-), 74(1), 93-98.
Hallmann & Griebeler, 2015	Hallmann, K., & Griebeler, E. M. (2015). Eggshell types and their evolutionary correlation with life-history strategies in squamates. PloS one, 10(9), e0138785.
Hammerson, 2007	Hammerson, G. 2007. "Heterodon simus" (On-line). The IUCN Red List of Threatened Species 2007: e.T63821A12718888. Accessed September 11, 2016 at http://dx.doi.org/10.2305/IUCN.UK.2007.RLTS.T63821A12718888.en.
Harbig, 2000	Harbig, P. (2000). Erste Erfahrungen bei Terrarienhaltung und Zucht des Laos-Kielskinks, Tropidophorus laotus Smith, 1923. Sauria, 22, 3-9.
Harding and Rockafield, 2012	Harding, J. H. and Rockafield, K. 2012. Nerodia sipedon (northern watersnake). Captive longevity. Herpetological Review 43: 265.
Harding, 1997	Harding, J. 1997. Amphibians and Reptiles of the Great Lakes Region. Ann Arbor, Michigan: The University of Michigan Press.
Harding, 2006	Harding, J. 2006. Amphibians and Reptiles of the Great Lakes Region. United States of America: The University of Michigan Press.
Harless & Morlock, 1979	Marion Harless & Henry Morlock, eds., 1979. Turtles: Perspectives and Research. John Wiley & Sons, New York
Hauschild & Gassner, 1995	Hauschild, A., & Gassner, P. (1995). Skinke im Terrarium. Landbuch-Verlag.
Heatwole & Taylor, 1987	Heatwole, H., & Taylor, J. A. (1987). Ecology of reptiles.
Henderson & Powell, 2009	Henderson, R. W., & Powell, R. (2009). Natural history of West Indian reptiles and amphibians. University Press of Florida.
Hews, 1993	Hews, D. K. (1993). Food resources affect female distribution and male mating opportunities in the iguanian lizard Uta palmeri. Animal Behaviour, 46(2), 279-291.
Hirth, 1963	Hirth, H.F. 1963. The ecology of two lizards on a tropical beach. Ecological Monographs 33: 83-112.
Hoare et al. 2005	Hoare, J. M., Stephens, C. L., Daugherty, C. H., & Phillpot, P. M. S. (2005). Oligosoma lineoocellatum (spotted skink). Longevity, site fidelity. Herpetological Review, 36, 181.
Hofmeyr, 2009	Hofmeyr, M.D. 2009. Chersina angulata (Schweigger 1812) – Angulate Tortoise, South African Bowsprit Tortoise. Chelonian Research Monographs (5): 030.1-030.6
Holman et al. 1999	Holman, J., J. Harding, M. Hensley, G. Dudderar. 1999. Michigan Snakes. East Lansing, MI: Michigan State University Extension/MSU Museum.
Honegger, 1969	Honegger, R. E. (1969). Notes on some amphibians and reptiles at Zurich Zoo. International Zoo Yearbook, 9(1), 24-28.
Hoser, 1989	Hoser, R. 1989. Australian Reptiles and Frogs. Australia: Pierson & Co.
Hossie et al. 2013	Hossie, T. J., Hassall, C., Knee, W., & Sherratt, T. N. (2013). Species with a chemical defence, but not chemical offence, live longer. Journal of evolutionary biology, 26(7), 1598-1602.
Houston & Shine, 1994	Houston, D., R. Shine. 1994. Low growth rates and delayed maturation in Arafura file snakes (Serpentes: Acrochordidae) in tropical Australia. American Society of Ichthyologists and Herpetologists, 1994/3: 726-731.
Hughes, 1988	Hughes, B. (1988). Herpetology in Ghana (West Africa). British Herpetological Society Bulletin, 25, 29-38.
Iverson et al. 2004	Iverson, J. B., Hines, K. N., & Valiulis, J. M. (2004). The nesting ecology of the Allen Cays rock iguana, Cyclura cychlura inornata in the Bahamas. Herpetological Monographs, 18(1), 1-36.
Jackson, 2007	Jackson, J. C. (2007). Reproduction in dwarf chameleons (Bradypodion) with particular reference to B. pumilum occurring in fire-prone fynbos habitat (Doctoral dissertation, Stellenbosch: Stellenbosch University).
Jennings & Hayes, 1994	Jennings, M. R., & Hayes, M. P. (1994). Amphibian and reptile species of special concern in California (p. 255). Rancho Cordova, CA: California Department of Fish and Game, Inland Fisheries Division.
Jesus, 2012	Jesus, J. (2012). Evidence of high longevity in an Island lacertid, Teira dugesii (Milne-Edwards, 1829). First data on wild specimens. Acta Herpetologica, 7(2), 309-313.
Jin & Liao, 2015	Jin, Y., & Liao, P. (2015). An elevational trend of body size variation in a cold-climate agamid lizard, Phrynocephalus theobaldi. Current Zoology, 61(3), 444-453.
Johnson, 1965	Johnson, S. 1965. An ecological study of the chuckwalla, Sauromalus obesus Baird, in the western Mojave Desert. Amer. Midl. Nat., 73/1: 1-29.
Johnston, 1999	Johnston, G. (1999). Reproductive biology of the Peninsula dragon lizard, Ctenophorus fionni. Journal of Herpetology, 33(4), 694-698.
Jones & Lovich, 2009	Jones, L. L., & Lovich, R. E. (2009). Lizards of the American Southwest: a photographic field guide. Rio Nuevo Publishers.
Juvik et al. 1981	Juvik, J. O., Andrianarivo, A. J., & Blanc, C. P. (1981). The ecology and status of Geochelone yniphora: a critically endangered tortoise in northwestern Madagascar. Biological Conservation, 19(4), 297-316.
Kalayci et al. 2015	KALAYCI, T. E., ALTUNIŞIK, A., GÜL, Ç., ÖZDEMİR, N., & TOSUNOĞLU, M. (2015). Preliminary data on the age structure of Asaccus barani (Baran's leaf-toed gecko) from southeastern Anatolia, Turkey. Turkish Journal of Zoology, 39(4), 680-684.
Kaplan, 2003	Kaplan, M. 2003. "Melissa Kaplan's Herp Care Collection" (On-line ). Anoles. Accessed March 21, 2003 at http://www.anapsid.org/anole.html.
Kidov et al. 2017	Kidov, A. A., Timoshina, A. L., Khayrutdinov, I. Z., & Matushkina, K. A. (2017). Vozrast, rost i razmnozheniye artvinskoy yashcheritsy, Darevskia derjugini (Nikolsky, 1898) na severovostochnoy periferii areala [Age, growth and reproduction of the artinian lizard, Darevskia derjugini (Nikolsky, 1898) on the north-eastern periphery of the area]. Vestnik Chuvashskogo gosudarstvennogo pedagogicheskog…
Kivit & Wiseman, 2000	Kivit, R., & Wiseman, S. (2000). The Green Tree Python & Emerald Tree Boa: Their Captive Husbandry and Reproduction. Kirschner & Seufer Verlag.
Köhler et al. 2014	Köhler, G., Pérez, R. G. T., Petersen, C. B. P., & de la Cruz, F. R. M. (2014). A revision of the Mexican Anolis (Reptilia, Squamata, Dactyloidae) from the Pacific versant west of the Isthmus de Tehuantepec in the states of Oaxaca, Guerrero, and Puebla, with the description of six new species. Zootaxa, 3862(1), 1-210.
Kumaş & Ayaz, 2014	Kumaş, M., & Ayaz, D. (2014). Age determination and long bone histology in Stellagama stellio (Linnaeus, 1758)(Squamata: Sauria: Agamidae) populations in Turkey. Vertebr Zool, 64, 113-126.
Lamar et al. 2015	Lamar, W. W., Barrio-Amorós, C. L., Dwyer, Q., Abarca, J. G., & De Plecker, R. (2015). The gerrhonotine genus Coloptychon (Sauria: Anguidae). Mesoamerican Herpetology, 2, 88-104.
Langerwerf, 2006	Langerwerf, B. (2006). Water Dragons. TFH Publications Inc.
Laver et al. 2012	Laver, R. J., Purwandana, D., Ariefiandy, A., Imansyah, J., Forsyth, D., Ciofi, C., & Jessop, T. S. (2012). Life-history and spatial determinants of somatic growth dynamics in Komodo dragon populations. PLoS One, 7(9), e45398.
Le Berre & Bartlett, 2009	Le Berre, F., & Bartlett, R. D. (2009). The chameleon handbook. Barron's Educational Series.
Leclair Jr & Leclair, 2011	Leclair Jr, R., & Leclair, M. H. (2011). Life-history traits in a population of the dwarf gecko, Sphaerodactylus vincenti ronaldi, from a xerophytic habitat in Martinique, West Indies. Copeia, 2011(4), 566-576.
Legler & Vogt, 2013	Legler, J., & Vogt, R. C. (2013). The turtles of Mexico: land and freshwater forms. Univ of California Press.
Lemos-Espinal & Dixon, 2013	Lemos-Espinal, J. A., & Dixon, J. R. (2013). Amphibians and Reptiles of San Luis Potosí. Eagle Mountain Publishing.
Lillywhite, 1996	Lillywhite, H. B. (1996). Husbandry of the little file snake, Acrochordus granulatus. Zoo Biology, 15(3), 315-327.
Lim & Lim, 1992	Lim, K. K. P., & Lim, F. L. K. (1992). A Field Guide to the Amphibians & Reptiles of Singapore, 160. Singapore Science Centre, Singapore.
Loveridge, 1942	Loveridge, A. (1942). Scientific Results of a Fourth Expedition to Forested Areas in East & Central Africa: IV, Reptiles. Museum of Comparative Zoölogy.
Marais, 2004	Marais, J. 2004. A Complete Guide to the Snakes of Southern Africa, 2nd ed. Struik Publishers, 312 pp.
Marchioro et al. 2005	Marchioro, M., Nunes, J. M. D. A. M., Ramalho, A. R., Molowny, A., Perez-Martinez, E., Ponsoda, X., & Lopez-Garcia, C. (2005). Postnatal neurogenesis in the medial cortex of the tropical lizard Tropidurus hispidus. Neuroscience, 134(2), 407-413.
Martins & Souza, 2008	Martins, F. I., & Souza, F. L. (2008). Estimates of growth of the Atlantic rain forest freshwater turtle Hydromedusa maximiliani (Chelidae). Journal of Herpetology, 42(1), 54-60.
Mattioli et al. 2006	Mattioli, F., Gili, C., & Andreone, F. (2006). Economics of captive breeding applied to the conservation of selected amphibian and reptile species from Madagascar. Natura–Società italiana di Scienze naturali e Museo civico di Storia Naturale di Milano, 95(2), 67-80.
Mattison, 1995	Mattison, C. 1995. The Encyclopedia of Snakes. New York, NY: Facts on File, Inc.
Mattison, 2007	Mattison, C. 2007. The New Encyclopedia of Snakes. New Jersey: Princeton University Press.
Mautz & Lopez-Forment, 1978	Mautz, W. J., & Lopez-Forment, W. (1978). Observations on the activity and diet of the cavernicolous lizard Lepidophyma smithii (Sauria: Xantusiidae). Herpetologica, 311-313.
Mendyk, 2015	Mendyk, R. W. (2015). Life expectancy and longevity of varanid lizards (Reptilia: Squamata: Varanidae) in North American zoos. Zoo biology, 34(2), 139-152.
Mertz, 2009	Mertz, L. 2009. "Alligators and Caimans" (On-line). Accessed November 28, 2009 at http://www.novelguide.com/a/discover/grze_07/grze_07_00439.html#Common_caiman.
Minakami, 1979	Minakami, K. 1979. An Estimation of Age and Life-span of the Genus Trimeresurus (Reptilia, Serpentes, Viperidae) on Amami Oshima Island, Japan. Journal of Herpetology, 13/2: 147-152.
Mitchell, 1994	Mitchell, J. 1994. The Reptiles of Virginia. Washington, DC: Smithsonian Institution Press.
Miyata. 2013	Miyata, K. I. (2013). Studies on the ecology and population biology of little known ecuadorian Anoles. Bulletin of the Museum of Comparative Zoology, 161(2), 45-78.
Montanucci, 1997	Montanucci, R. 1997. Captive management, behavior and conservation of chuckwallas, Sauromalus obesus (Lacertilia: Iguanidae). Bull Chicago Herp. Soc., 32/6: 121-127.
MONTANUCCI, 2015	MONTANUCCI, RICHARD R. 2015. A taxonomic revision of the Phrynosoma douglasii species complex (Squamata: Phrynosomatidae) Zootaxa 4015 (1): 001–177
Morgan-Richards et al. 2013	Morgan-Richards, M., Hinlo, A. R., Smuts-Kennedy, C., Innes, J., Ji, W., Barry, M., ... & Hitchmough, R. A. (2016). Identification of a rare gecko from North Island New Zealand, and genetic assessment of its probable origin: a novel mainland conservation priority?. Journal of Herpetology, 50(1), 77-86.
Mussart et al. 2006	Mussart, N. B., Barboza, N. N., Fioranelli, S. A., Koza, G. A., Prado, W. S., & Coppo, J. A. (2006). Age, sex, year season, and handling system modify the leukocytal parameters from captive Caiman latirostris and Caiman yacare (Crocodylia: Alligatoridae). Revista Veterinaria, 17(1), 3-10.
Necas, 1999	Necas, P. (1999). Chameleons-Nature's Hidden Jewels. Edition Chimaira, Frankfurt; 348 pp. ISBN 3-930612-04-6 (Europe)< br/> ISBN 1-57524-137-4 (USA, Canada).
Ortega-Rubio, 1993	Ortega-Rubio, A. (1993, February). Skeletochronology in the mezquite lizard, Sceloporus grammicus. In Proceedings of the Oklahoma Academy of Science (Vol. 73, pp. 31-34).
O'Shea, 2005	O'Shea, M. 2005. Venomous Snakes of the World. Princeton, NJ: Princeton University Press.
Pal et al. 2009	Pal, A., Swain, M. M., & Rath, S. (2009). Long bone histology and skeletochronology in a tropical Indian lizard, Sitana ponticeriana (Sauria: Agamidae).
Panov & Zykova, 2016	Panov, E. N., & Zykova, L. Y. (2016). Rock Agamas of Eurasia. KMK Scientific Press.
Pauwels et al. 2017	Pauwels, Olivier & Luis Bonnin, Jose & Sancho, Vicente & Wilms, Thomas. (2017). Uromastyx nigriventris (Moroccan Spiny-tailed Lizard). Longevity.. Herpetological Review. 48. 569.
Pearson & Jones, 2000	Pearson, D. J., & Jones, B. (2000). Lancelin Island skink recovery plan. Department of Conservation and Land Management.
Pernetta & Burgin, 1983	Pernetta, J. C., & Burgin, S. (1983). The status and ecology of crocodiles in the Purari. In The Purari—tropical environment of a high rainfall river basin (pp. 409-428). Springer, Dordrecht.
Perry & Dmi'el, 1994	Perry, G., & Dmi'el, R. (1994). Reproductive and population biology of the fringe-toed lizard, Acanthodactylus scutellatus, in Israel. Journal of Arid Environments, 27(3), 257-263.
Petzold et al. 2008	Petzold, H. G., Murphy, J. B., & Murphy, J. B. (2008). The Lives of Captive Reptiles. Society for the Study of Amphibians and Reptiles.
Pianka & King, 2004	Pianka, E., & King, D. (Eds.). (2004). Varanoid lizards of the world. Indiana University Press.
Pianka & Parker, 1975	Pianka, E. R., & Parker, W. S. (1975). Ecology of horned lizards: a review with special reference to Phrynosoma platyrhinos. Copeia, 141-162.
Pianka & Pianka, 1970	Pianka, E. R., & Pianka, H. D. (1970). The ecology of Moloch horridus (Lacertilia: Agamidae) in western Australia. Copeia, 90-103.
Pianka, 2011	Pianka, E. R. (2011). Notes on the natural history of the tiny skink Menetia greyi. Western Australian Naturalist (Perth), 28, 12-17.
Piantoni et al. 2006	Piantoni, C., Ibargüengoytía, N. R., & Cussac, V. E. (2006). Growth and age of the southernmost distributed gecko of the world (Homonota darwini) studied by skeletochronology. Amphibia-Reptilia, 27(3), 393-400.
Plummer, 1985	Plummer, M. 1985. Demography of Green Snakes (Opheodrys aestivus). Herpetologica, Vol. 41, No. 4: 373-381.
Plummer, 1997a	Plummer, M. 1997. Population Ecology of Green Snakes (Opheodrys aestivus) Revisited. Herpetological Monographs, Vol. 11: 102-123.
Plummer, 1997b	Plummer, M. 1997. Speed and Endurance of Gravid and Nongravid Green Snakes, Opheodrys aestivus. Copeia, Vol. 1997, No. 1: 191-194.
Purwandana et al. 2015	Purwandana, D., Ariefiandy, A., Imansyah, M. J., Ciofi, C., Forsyth, D. M., Gormley, A. M., ... & Jessop, T. S. (2015). Evaluating environmental, demographic and genetic effects on population‐level survival in an island endemic. Ecography, 38(10), 1060-1070.
Ramiro et al. 2017	Ramiro, C. N., Junior, M. T., & Rodrigues, M. T. (2017). Reproductive Biology of Three Sympatric Species of Gymnophthalmid Lizards from the Sand Dunes of the Middle São Francisco River, Bahia, Brazil. South American Journal of Herpetology, 12(1), 76-88.
Read, 1998	Read, J. L. (1998). The ecology of sympatric scincid lizards (Ctenotus) in arid South Australia. Australian Journal of Zoology, 46(6), 617-629.
Reading, 2004	Reading, C. J. (2004). Age, growth and sex determination in a population of smooth snakes, Coronella austriaca in southern England. Amphibia-Reptilia, 25(2), 137-150.
Reagan, 1992	Reagan, D. P. (1992). Congeneric species distribution and abundance in a three-dimensional habitat: the rain forest anoles of Puerto Rico. Copeia, 392-403.
Regalado, 2006	Regalado, R. (2006). Reproduction and growth of seven species of dwarf geckos, Sphaerodactylus (Gekkonidae), in captivity. Herpetological Review, 37(1), 13-19.
Ripple, 1996	Ripple, J. 1996. Sea Turtles. Minnesota: Voyaguer Press.
Robin et al. 2011	Robin, L., Dickman, C., & Martin, M. (2011). Desert Channels: The Impulse to Conserve. CSIRO PUBLISHING.
Rodríguez-Romero et al. 2004	Rodríguez-Romero, F., Smith, G. R., Cuellar, O., & Méndez de la Cruz, F. R. (2004). Reproductive traits of a high elevation viviparous lizard Sceloporus bicanthalis (Lacertilia: Phrynosomatidae) from Mexico. Journal of Herpetology, 38(3), 438-443.
Rodríguez-Romero et al. 2011	Rodríguez-Romero, F., Smith, G. R., Méndez-Sánchez, F., Hernández-Gallegos, O., Nava, P. S., & Méndez de la Cruz, F. R. (2011). Demography of a semelparous, high-elevation population of Sceloporus bicanthalis (Lacertilia: Phrynosomatidae) from the Nevado de Toluca volcano, Mexico. The Southwestern Naturalist, 56(1), 71-77.
Rogner, 1997	Rogner, M. (1997). Lizards: husbandry and reproduction in the vivarium. Volume 1. Geckos, flap-footed lizards, agamas, chameleons, and iguanas.
Rotger et al. 2016	Rotger, A., Igual, J. M., Smith, J. J., & Tavecchia, G. (2016). Relative role of population density and climatic factors in shaping the body growth rate of Lilford’s Wall Lizard (Podarcis lilfordi). Canadian Journal of Zoology, 94(3), 207-215.
Sasa et al. 2009	Sasa, M., Wasko, D. K., & Lamar, W. W. (2009). Natural history of the terciopelo Bothrops asper (Serpentes: Viperidae) in Costa Rica. Toxicon, 54(7), 904-922.
Sastrawan & Ciofi, 2002	Sastrawan, P., & Ciofi, C. (2002). Komodo Dragons: Biology and Conservation.
Schleich & Kästle, 2002	Schleich, H. H., & Kästle, W. (2002). Amphibians and reptiles of Nepal. Biology, Systematics, Field Guide. Koenigstein: Koeltz Scientific Books, 1201.
Schleich et al. 1996	Schleich, H. H., Kästle, W., & Kabisch, K. (1996). Amphibians and reptiles of North Africa (Vol. 63). Germany: Koeltz scientific books, Koenigstein.
Seufer et al. 2005	Seufer, H., Kaverkin, Y., & Kirschner, A. (Eds.). (2005). The eyelash geckos: care, breeding and natural history. Kirschner & Seufer Verlag.
Seufer, 2017	SEUFER, H. 2017. Eine schier unglaubliche Geschichte oder Anmerkungen zum Lebensalter von Doppelschleichen (Amphisbaenia) Sauria 39 (1): 17-20
Shaw, 1959	Shaw, J. (1959). Salt and water balance in the East African fresh-water crab, Potamon niloticus (M. Edw.). Journal of Experimental Biology, 36(1), 157-176.
Shea, 2010	Shea, G. M. (2010). The suburban terrestrial reptile fauna of Sydney–winners and losers. The natural history of Sydney, 154-197.
Sherbrooke, 2003	Sherbrooke, W. C. (2003). Introduction to horned lizards of North America (No. 64). Univ of California Press.
Sinsch et al. 2002	Sinsch, U., Martino, A. L., & di Tada, I. E. (2002). Longevity and sexual size dimorphism of the Pampa de Achala copper lizard Pristidactylus achalensis (Gallardo, 1964). Amphibia-Reptilia, 23(2), 177-190.
Slavens and Slavens, 1994	Slavens, F. L., & Slavens, K. (1994). Reptiles and amphibians in captivity: breeding, longevity, and inventory, current January 1, 1994.
Smirina & Ananjeva, 2007	Smirina, E. M., & Ananjeva, N. B. (2007). Growth layers in bones and acrodont teeth of the agamid lizard Laudakia stoliczkana (Blanford, 1875)(Agamidae, Sauria). Amphibia-Reptilia, 28(2), 193-204.
Smirina & Ananjeva, 2017	Smirina, E., & Ananjeva, N. (2017). On the longevity, growth and reproductive characteristics of Lichtenstein’s Toadhead Agama, Phrynocephalus interscapularis Lichtenstein, 1856 (Agamidae, Sauria). Amphibia-Reptilia, 38(1), 31-39.
Smith et al. 2013	Smith, A. L., Bull, C. M., & Driscoll, D. A. (2013). Skeletochronological analysis of age in three'fire-specialist'lizard species. South Aust. Nat, 87, 6-17.
Snider and Bowler, 1992	Andrew T. Snider, J. Kevin Bowler, Society for the Study of Amphibians, & Reptiles. (1992). Longevity of reptiles and amphibians in North American collections (No. 21). Ssar Publications.
Sousa et al. 2015	Sousa, H. C. D., Soares, A. H. S., Costa, B. M., Pantoja, D. L., Caetano, G. H., Queiroz, T. A. D., & Colli, G. R. (2015). Fire regimes and the demography of the lizard Micrablepharus atticolus (Squamata, Gymnophthalmidae) in a biodiversity hotspot. South American Journal of Herpetology, 10(3), 143-156.
Spotila et al. 2000	Spotila, J. R., Reina, R. D., Steyermark, A. C., Plotkin, P. T., & Paladino, F. V. (2000). Pacific leatherback turtles face extinction. Nature, 405(6786), 529.
Stafford & Meyer, 2000	Stafford, P. J., & Meyer, J. R. (2000). guide to the reptiles of Belize. Academic Press.
Stebbins & McGinnis, 2012	Stebbins, R. C., & McGinnis, S. M. (2012). Field guide to amphibians and reptiles of California: revised edition (Vol. 103). Univ of California Press.
Stevenson et al. 2003	Stevenson, D., K. Dyer, B. Willis-Stevenson. 2003. "SURVEY AND MONITORING OF THE EASTERN INDIGO SNAKE IN GEORGIA."" (On-line). Accessed April
Sullivan and Sullivan, 2008	Sullivan, B., K. Sullivan. 2008. Common chuckwalla (Sauromalus ater) populations in the Pheonix metropolitan area: stability in urban preserves. Herpetological Conservation and Biology, 3/2: 149-154.
Svatek & van Duin, 2001	Svatek, S., & van Duin, S. (2001). Keeping and Breeding Leaf-tailed Geckos: The Genus Uroplatus. Brähmer-Verlag.
Szczerbak, 2003	Szczerbak, N. N. (2003). Guide to the reptiles of the Eastern Palearctic. Krieger Publish Compani, Malabar, 260 p.
Tacutu et al. 2013	Tacutu, R., T. Craig, A. Budovsky, D. Wuttke, G. Lehmann, D. Taranukha, et al. 2013. Human Ageing Genomic Resources: integrated databases and tools for the biology and genetics of ageing. Nucleic Acids Res. 41:D1027–D1033.
Tanner & Krogh, 1975	Tanner, W. W., & Krogh, J. E. (1975). Ecology of the zebra-tailed lizard Callisaurus draconoides at the Nevada test site. Herpetologica, 302-316.
TAUM	Tel Aviv University, Zoological Museum data
Tinkle & Dunham, 1983	Tinkle, D. W., & Dunham, A. E. (1983). Demography of the tree lizard, Urosaurus ornatus, in central Arizona. Copeia, 585-598.
Tomašević-Kolarov et al. 2010	Tomašević-Kolarov, N., Ljubisavljević, K., Polović, L., Džukić, G., & Kalezić, M. L. (2010). The body size, age structure and growth pattern of the endemic Balkan mosor rock lizard (Dinarolacerta mosorensis Kolombatović, 1886). Acta Zoologica Academiae Scientiarum Hungaricae, 56(1), 55-71.
Towns & Ferreira, 2001	Towns, D. R., & Ferreira, S. M. (2001). Conservation of New Zealand lizards (Lacertilia: Scincidae) by translocation of small populations. Biological conservation, 98(2), 211-222.
Towns, 1994	Towns, D. R. (1994). The role of ecological restoration in the conservation of Whitaker's skink (Cyclodina whitakeri), a rare New Zealand lizard (Lacertilia: Scincidae). New Zealand journal of zoology, 21(4), 457-471.
Tsellarius & Tsellarius, 2009	Tsellarius, A. Y., & Tsellarius, E. Y. (2009). LONGEVITY AND FACTORS OF MORTALITY IN THE ROCK LIZARD DAREVSKIA BRAUNERI (REPTILIA, SAURIA) BASED ON LONG-TERM OBSERVATIONS IN THE NAVAGIR RIDGE. ZOOLOGICHESKY ZHURNAL, 88(10), 1276-1280.
Tuberville et al. 2000	Tuberville, T., J. Bodie, J. Jensen, L. LaClaire, J. Gibbons. 2000. Apparent decline of the southern hog-nosed snake, Heterodon simus. Journal of the Elisha Mitchell Scientific Society, 116/1: 19-40.
Tucker et al. 1997	Tucker, A. D., McCallum, H. I., & Limpus, C. J. (1997). Habitat use by Crocodylus johnstoni in the Lynd River, Queensland. Journal of Herpetology, 31(1), 114-121.
Üzum et al. 2015	ÜZÜM, N., Avci, A., KUMLUTAŞ, Y., BEŞER, N., & Ilgaz, C. (2015). The first record of age structure and body size of the Suphan Racerunner, Eremias suphani Başoğlu & Hellmich, 1968. Turkish Journal of Zoology, 39(3), 513-518.
van der Reijden, 2008	van der Reijden, J. 2008. The captive maintenance and breeding of Diporiphora winneckei (Cane grass dragon) at the Alice Springs Desert Park. Australian Society of Zoo Keeping INC. Special Publication
Vial et al. 1977	Vial, J., T. Berger, W. McWilliams, Jr.. 1977. Quantitative demography of copperheads Agkistrodon contortrix (Serpentes: Viperidae). Researches on Population Ecology, 18: 223-234.
Vincent & Birkett, 1999	Vincent, M., & Birkett, J. (1999). The arafura file snake (Acrochordus arafurae).
Wapstra et al. 2001	Wapstra, E., Swain, R., & O'Reilly, J. M. (2001). Geographic variation in age and size at maturity in a small Australian viviparous skink. Copeia, 2001(3), 646-655.
Weaver, 2009	Weaver, R. 2009. Microhabitat and prey odor selection in Hypsiglena chlorophaea. Copeia, 2009/3: 475-482. Accessed February 20, 2012 at http://www.asihcopeiaonline.org/doi/abs/10.1643/CE-08-094.
Wechsler, 2001	Wechsler, D. 2001. Garter Snakes. New York: The Rosen Publishing Group, Inc.
Werner & Sivan, 1994	Werner, Y. L., & Sivan, N. (1994). Systematics and zoogeography of Ptyodactylus (Reptilia: Sauria: Gekkonidae) in the Levant: 2, Taxonomy, with a review of ecology and zoogeography. Rev. Esp. Herp, 8, 105-122.
Werner et al. 1993	Werner, Y. L., Frankenberg, E., Volokita, M., & Harari, R. (1993). Longevity of geckos (Reptilia: Lacertilia: Gekkonoidea) in captivity: an analytical review incorporating new data. Israel Journal of Zoology, 39(2), 105-124.
Werner, 2016	Werner, Y. L. (2016). The effects of temperature on regeneration speed: a comment on Saccucci et al., 2016. Journal of Zoology, 300(4), 237-238.
While et al. 2009	While, G. M., Uller, T., & Wapstra, E. (2009). Family conflict and the evolution of sociality in reptiles. Behavioral Ecology, 20(2), 245-250.
Whitaker & Sadlier, 2011	Whitaker, A. H., & Sadlier, R. A. (2011). Skinks and geckos from New Caledonia. The IUCN Red List of Threatened Species. Version 2015-3.
Wiederhecker et al. 2003	Wiederhecker, H. C., Pinto, A. C., Paiva, M. S., & Colli, G. R. (2003). The demography of the lizard Tropidurus torquatus (Squamata, Tropiduridae) in a highly seasonal Neotropical savanna. Phyllomedusa: Journal of Herpetology, 2(1), 09-19.
Wikelski & Thom, 2000	Wikelski, M., & Thom, C. (2000). Marine iguanas shrink to survive El Niño. Nature, 403(6765), 37.
Wilms, 2005	Wilms, T. (2005). Uromastyx: natural history, captive care, breeding. Herpeton.
Wilson & Swan, 2009	Wilson, S., & Swan, G. (2009). What Lizard is That?: Introducing Australian Lizards. Reed New Holland.
Wilson, 2012	Wilson, S. (2012). Australian lizards: a natural history. Csiro Publishing.
Wyrich et al. 2015	Wyrich, Luke, Robert HIll and Brad Lock. 2015. Captive husbandry of the Arakan Forest turtle (Heosemys depressa) and its implications for conservation. Herpetological Review 46 (1): 49-54
Yakin & Tok, 2015	Yakin, B. Y., & Tok, C. V. (2015). Age estimation of Anatololacerta anatolica (Werner, 1902) in the vicinity of Çanakkale by skeletochronology. Turkish Journal of Zoology, 39(1), 66-73.
Yakin et al. 2012	Yakin, B. Y., Gürkan, M., Hayretdağ, S., & Tok, C. V. (2012). Preliminary Data on Age Estimation and Body Size of the Dwarf Lizard, Parvilacerta parva (Boulenger, 1887)(Reptilia: Lacertilia) from Akşehir, Konya (Turkey). Ecologia Balkanica, 4(1).
Zaldívar-Riverón & Nieto-Montes, 2002	Zaldívar-Riverón, A., & Nieto-Montes de Oca, A. (2002). Variation in the rare lizard Barisia rudicollis (Wiegmann)(Anguidae) with description of a new species from central Mexico. Herpetologica, 58(3), 313-326.
Zug et al. 1982	Zug, G. R., Barber, M. M., & Dudley, J. C. (1982). Gonadal histology and reproduction in Carlia bicarinata (Scincidae, Sauria, Reptilia) of the Port Moresby area, Papua New Guinea. Herpetologica, 418-425.
Zúñiga-Vega et al. 2005	Zúñiga-Vega, J. J., Rojas-González, R. I., Lemos-Espinal, J. A., & Pérez-Trejo, M. E. (2005). Growth ecology of the lizard Xenosaurus grandis in Veracruz, México. Journal of Herpetology, 39(3), 433-443.
Zweifel & Lowe, 1966	Zweifel, R. G., & Lowe, C. H. (1966). The ecology of a population of Xantusia vigilis, the desert night lizard. American Museum novitates; no. 2247.
